# Supplementary material
Source: PubMed Central journal article supplement (PMC7313240)
Supplement: NIHMS1596626-supplement-Sup1.pdf [file NIHMS1596626-supplement-Sup1.pdf]

*Authors' Note:* In an effort to follow our own advice calling for greater transparency in science and publishing, this is an example of the “transparent peer review” process that is being used in some journals such as Nature Communications and the BioMed Central and PLoS families of journals.

The present article went through 2 rounds of review by 4 anonymous reviewers. The full sets of reviews, responses, original, and revised submissions follow in reverse chronological order.

---

7 December 2018

## **Responses to reviews of Revision 1: “Scientific Integrity Issues in Environmental Toxicology: improving research reproducibility, credibility, and transparency”**

We greatly appreciate the continuing interest and constructive advice from all four reviewers. Our point-by-point responses and explanations of revisions follows. Original comments are in black text and our responses are indented and in blue colored text.

### **Associate Editor Comments**

Comments to the Author:

Thank you again for submitting your paper to IEAM. As the assigned editor, I apologize for the 12-day delay in completion of the second review. That was my fault.

The paper still needs minor revisions, but it does not have to go back to the peer reviewers again. Please address the reviewers' comments on the second draft.

Two reviewers had comments about the tone of the manuscript. Here are a couple examples:

"...the opening sentence about elections is weak... it sets an unfortunate political tone that implies bias."

"Line 760-765: Unnecessary ridicule of researchers that lacks a reference. Remove or rephrase."

These are valid criticisms that should be addressed to improve the impact of the paper.

[The relevant sections of those sentences have been removed to appease the reviewers' criticisms.](#)

\*\*\*\*\*

### **Reviewer(s)' Comments to Author:**

#### **Reviewer: 1**

Comments to the Author

I noted that the authors added "chemistry" to the title but forgot to also add that to the rest of the manuscript. Many of the recommendations and examples only address ecotoxicologists, e.g. the section "Education as the way forward".

We also added a specific section on chemistry issues. Changing most usages to “ecotoxicology and chemistry” would be ponderous, and some aspects are specific to ecotoxicology.

Line 66. Remove "ample" for a more balanced view.

We acknowledge that Reviewer 1 may not accept our examples and arguments that “*there is ample room for improvement within our discipline.*” We think the word “ample” is appropriate and was kept

Line 381. Add missing full stop after "breastfeeding". Good catch

Figures: Consider removing them completely. I understand your wish to make the text funny but I do not think that type of figures belongs in scientific papers.

The goal with this paper boils down to a hope that many will critically consider some of these points and spur further discussions and refinement of potential improvements. The approach of using cartoons to illustrate serious points and writing in a less formal way than is customary in science policy literature is aimed at hopefully hooking interest. We realize that by attempting to introduce elements of whimsy or humor into the arguments, some will be put off, but we hope more might continue reading and appreciate it. We think that a long, sincere essay of this sort could be dreadfully sincere, preachy and set aside by most. For example, journals such as Nature commission cartoons to inject humor into serious topics, such as [this](#), [this](#), or [that](#) or [this other](#) one. Reviewer #1 and others might think such dressings distract and detract from the serious business of science, but [others](#) argue for science writing to be less turgid and a drudge for readers. This one aims for the latter.

Line 488. Is the quote meant to be funny? It does not follow your own argumentation at all. Remove the quote.

Amended the lead in to spell it out – the point is that universities are dependent on external industry research funding, and the need for sufficient funding can trump concerns by administrators over the color of money. And some (obviously not all) readers might appreciate a memorable turn of phrase.

Line 634: To increase the relevance further, scientists should also read regulatory assessments (or is that included in "available literature"?). Suggested reference: <https://www.ncbi.nlm.nih.gov/pubmed/28452384>

We had overlooked the Ågerstrand paper. It is a good reference and we added it to the “Relevance” subheading.

Line 668: Suggested references for this section: <https://www.ncbi.nlm.nih.gov/pubmed/29960649>  
<https://www.ncbi.nlm.nih.gov/pubmed/30075188>

OK

Line 760-765: Unnecessary ridicule of researchers that lacks a reference. Remove or rephrase.

While we are unapologetic about trying to goad authors who can't be bothered to show their supporting data or work to change their ways, we agree the use of scare quotes confuse our strong criticisms as being a quote from others. Thus, we edited it out

The snip of the original text is pasted below:

759 (EC50, EC10, etc.), or no-and lowest-observed effects concentrations (NOECs, LOECs). These  
760 derived values are not data. Such data-poor publications essentially represent an implicit claim  
761 by the researcher to “*trust us, we know what we’re doing, our interpretation of the data is the*  
762 *only appropriate interpretation, you don’t need to see what you don’t see, and besides it’s our*  
763 *data to share as we see fit.*” Such attitudes reflect the norm in scientific publishing prior to the  
764 early 2000s, in which strict page limits and word limits precluded authors “wasting” space  
765 publishing data tables. With the provisions for electronic supplemental material beginning in the

And the revised text:

783 (EC50, EC10, etc.), or no-and lowest-observed effects concentrations (NOECs, LOECs). These  
784 derived values are not data. Such data-poor publications ~~essentially represent an implicit claim~~  
785 ~~by the researcher to “*trust us, we know what we’re doing, our interpretation of the data is the*~~  
786 ~~*only appropriate interpretation, you don’t need to see what you don’t see, and besides it’s our*~~  
787 ~~*data to share as we see fit.*”~~ Such attitudes reflect the norm ~~were necessary~~ in scientific  
788 publishing prior to the early 2000s, in which strict page limits and word limits precluded authors  
789 “wasting” space publishing ~~detailed data tables~~. With the provisions for electronic supplemental  
790 material beginning in the 2000s, and dedicated data repositories becoming widely available at

## Reviewer: 2

### Comments to the Author

The paper is significantly improved and is close to final. In particular, it is better organized and more consistent. However, I have a few specific suggestions.

I still think the opening sentence about elections is weak. I doubt that public opinions on science or expertise decided any recent election. In the case of BREXIT, apparently the major issue was immigration followed by nationalism. Discounting of expertise was a way of diminishing concerns about the economic consequences. Also, as an opening statement, it sets an unfortunate political tone that implies bias.

[Removed the election reference](#)

p. 4. I do not agree with the following response to my comment:

123-127 I do not consider this to be a deception. Journals do not want an account of a research program; most readers do not want it either and papers do not claim to present it. The reported methods are the methods that generated the reported results. Presenting all of the mistakes and failed methods would just be confusing. This is from a quote and presumably would be read as that one person’s viewpoint. It is not just “one person’s

viewpoint.” You adopted it as your viewpoint when you wrote that Goldstein “put it well.” I do not believe that it is desirable to describe an appropriate and generally accepted practice as deception. Nobody is deceived.

Changed “*Goldstein (1995) put it well*” to “*as Goldstein (1995) put it*” plus a remark that if concise writing neglects to mention statistical fishing or excludes data that don’t fit, that could bias the literature.

p. 18, items 1, 2. Field based environmental effects studies are seldom experiments. Most are observational. I suggest studies (as in the previous draft) or investigations. **Good point – made the change**

p. 18, items 5. You should not hope for a positive relationship, particularly in this paper! You should hope to accurately estimate the actual relationship. (I missed this one last time.)

**Fair point – changed to detecting real relationships if present**

### **Reviewer: 3**

#### Comments to the Author

I think the paper will be publishable, but there are still some suggestions I’d strongly recommend before publication:

(1) Most importantly, there’s still ambiguity about what exactly the paper’s take-home lesson is regarding how to promote scientific integrity. The last sentence of the abstract made it sound like their focus is on promoting rigor, relevant reproducible research, transparency, and education. But it wasn’t clear throughout the rest of the paper if this precise list was indeed the take-home lesson. On p. 17, they listed objectivity as part of their list with rigor, relevance, reproducibility, and transparency, and they didn’t mention education (although education was discussed later in the paper). At the end of the paper, on p. 32, they mention objectivity again in their list and don’t mention transparency. And then at the very end of the paper there’s a list of concrete suggestions. I liked the suggestions, but it wasn’t totally clear how these related to all the stuff about rigor, relevance, reproducibility, and transparency. It sounded like maybe the suggestions were focused specifically on promoting transparency, but I think the suggestions could promote all the items on the list. I would frame the list as a set of concrete strategies that different individuals and institutions could take to promote the rigor, relevance, reproducibility, and transparency that the authors are calling for.

The reviewer is correct that we certainly don’t have a plan to solve every behaviour. We have a few concrete suggestions but much of “scientific integrity” are things to consider or watch out for but don’t necessarily have prescriptive fixes. While we thought that objectivity ran throughout our other points on minimizing bias, we appreciate the criticism here that for parallel structure it could be good to have something specific to objectivity. So, we added a short section that mostly relies on links to other literature for a more detailed treatment

(2) Given how comprehensive the paper is, I think it’s somewhat surprising that it doesn’t mention the limitations of disclosure as a response to conflicts of interest. There’s important empirical literature suggesting that people who disclose conflicts of interest may feel more comfortable being biased as a result, and those who receive the information about conflicts of interest often don’t really know what to do with that information. I still think it makes sense to disclose conflicts of interest, but these cautionary points ought to be noted. (See Cain DM, Loewenstein G, Moore DA. The dirt on coming clean: perverse effects of disclosing conflicts of interest. *J Legal Stud* 2005;34:1–25.)

**That’s a good point. Transparency is well and good but avoiding conflicts of interest is better.**

(3) When the authors discuss cases of failing to disclose conflicts of interest on the top of p. 9, I would suggest mentioning the recent case where the journal Critical Reviews in Toxicology issued a correction because authors of articles in a supplement about glyphosate failed to acknowledge assistance provided by Monsanto. That whole case is reminiscent of the “publication planning” by industry that has been widely criticized in biomedical research. That sort of publication planning appears to be happening in toxicology research as well. (See <https://www.bloomberg.com/news/articles/2018-09-27/monsanto-s-role-in-roundup-safety-study-is-corrected-by-journal>)

Agreed, that is a relevant recent development in the field. Added citation to, but no discussion of this incident

(4) As I noted earlier, the section beginning on p. 17 about promoting integrity in ecotoxicology is confusing because it gives a list of key concepts and then proceeds to talk about all of them except objectivity. I mentioned this in my previous review. They need to drop the mention of objectivity there or include a section about it like they do with the other concepts. Another organizational weakness of that section is that they have sub-sections at the end on environmental chemistry and critical reviews. I’d be inclined to put those in a separate section because they don’t fit with the series of key concepts (rigor, reproducibility, relevance, transparency) that otherwise make up that section.

As noted above, we added a short section specific to objectivity. Objectivity should run throughout, and the discussion of confirmation bias is effectively on objectivity.

(5) I think it’s a mistake to say that education is the only way forward (see p. 31). It makes it sound like the best way to promote integrity is to tell people how to do the right thing, but a lot of psychological research suggests that’s not effective. You have to change people’s incentives, not just tell them what to do. This is why the NSF changed their science ethics program from a focus on education to a focus on “Creating Cultures for Ethical STEM.” The authors can keep that section on education as one piece of the solution, but they shouldn’t make it sound like the main solution.

We agree we shouldn’t imply education is the only way forward, but it is a way to foster a culture of science integrity. Revisions include making the title less specific and adding mentions of the importance of culture and enforcement.

(6) Instead of making education sound like the main solution, I think the authors should focus more on their concluding list of strategies. I would frame them as a list of concrete ways to promote the rigor, relevance, reproducibility, and transparency that they called for earlier.

Same as above

(7) When they talk about reproducibility, it seems like a shame not to mention the paper by Munafò et al. (2017) that provides concrete recommendations for promoting reproducibility: Munafò, M.R., Nosek, B.A., Bishop, D.V., Button, K.S., Chambers, C.D., du Sert, N.P., Simonsohn, U., Wagenmakers, E.J., Ware, J.J. and Ioannidis, J.P., 2017. A manifesto for reproducible science. Nature Human Behaviour, 1(1), p.0021.

We agree and appreciate having it pointed out to us

#### Reviewer: 4

[Reviewer 4 carried forward some previous author responses from the first round of reviews. These are indicated with red text.]

#### Review of IEAM-2018-029-CR-R1

**General:** Having read the author responses to reviewer comments for all four reviewers I think they have done a fairly reasonable balanced job overall. The manuscript is now much more structured and fluid. Moreover, I appreciate acknowledgment by the authors regarding the need to address educational consideration and focus, with particular mention in the abstract. Consequently I believe the manuscript is acceptable and I have only provided minor comments below, but these are not considered to be mandatory for publication, rather for consideration.

**Specific** (note these page/line number pertain to the previous version and comments):

Page 14, Page 301-304: Do the author's feel that such disclosures should be universal regardless of funding source and affiliation? It has been my experience that for industry funded projects or collaborations the requisite degree of disclosure (conflicts of interest etc.) are quite onerous relative to other sectors. Would it be reasonable to suggest a more generally prescriptive approach that is consistent across sectors and reflective of equality?

Perhaps we are naïve, but our suggestion is that for most people and situations regardless of where the funding came from, a more prescriptive approach is doubtfully helpful. Instead we argue "simple, unambiguous statements of the funding sources that directly or indirectly allowed the work to be completed should generally be sufficient."

***As a personal anecdote, the expectation for industry sponsored research is to not only indicate as much (which makes perfect sense for any funding source) but also to indicate if an author is employed by, or otherwise affiliated with, the sponsor. Additionally, I have recently been requested to detail roles and responsibilities of individual authors in the acknowledgments. I do not necessarily take exception to these requirements in principle, but rather the lack of tripartite equality per se. If the goal is transparency, to be an egalitarian society, then consistency is paramount.***

Hopefully our viewpoint comes through clearly that such disclosures are appropriate for all, although in practice some will be tedious and redundant. No change made.

Page 18, Lines 383-384: Why "particularly when funded by sponsors with financial interests in the findings"? In what situation does a 'funder' not have interest in the findings? This seems to be venturing into the realm of the subjective here

In my (cm) experience with government-funded research (other than NRDA), the funding entity does not stand to directly gain or lose financially from the study outcomes. They have just wanted a reliable answer to their questions, not a particular answer. No changes made.

***Honestly that is a bit of a softball response, and I still take exception to the word "particularly", although this may be an artifact of the cited source. Also, emphasizing 'financial incentive' as an agent of bias vulnerability suggests disproportionate influence relative to reputational bias, personal bias, political bias etc. Moreover, although in cases where a funding entity may be considered bias neutral, that neutrality does not necessarily transfer to the recipient of the funding. Anyway, just seems a little loaded to me...***

(In my copy, this phrase was at line 411). That's a fair criticism, especially since the phrase was specific to risk assessment, not studies in general. Removed the sentence fragment about financial bias, since as noted, alternatively agency risk assessors can "be on a mission" or subject to other kinds of bias. It reads better to delete rather than balance with other types of potential bias.

Page 18, Lines 384-389: These are artifacts of scale, resolution, technical precision as well as matters of policy. Risk assessments are often screening level by design in order to minimize type-II errors, but seldom move to higher tiers of refinement because there is no established mechanism for interpretation and incorporation.

That's a perceptive point, but to actually work it into the text would require expansion and additional literature searching and citing. The manuscript had gained weight as it is through responses to review suggestions, and in consideration, we think it best to leave this paragraph as is.

***Fair enough, though it is often poorly understood just how conservative screening-level risk assessments are (and they are with good reason), and that in fact the EPA subscribes to a tiered risk assessment framework to potentially address the type I/type II error rate artifact (hypothetically).***

We agree this is an important point, but after some attempts to work it into the paragraph with enough words to make sense, but not too many words, it seemed like it was getting off point and we didn't incorporate those points. Also, we were unable to quickly find a good reference on the point that risk assessments "*seldom move to higher tiers of refinement because there is no established mechanism for interpretation and incorporation.*" The risk assessment terminology hadn't been used earlier in the manuscript and would need explanations such as screening levels, and higher tiers. The terminology and definitions vary somewhat between European and American regulatory approaches. We have so much already, getting more into the particulars of risk assessment practices seemed a little too much.

By the way, the line numbers between Reviewer 4 and our proof go out of sync here, for in the author proof, the text mentioning risk assessment uncertainties that corresponds with the comment was at lines 405 to 418 on p. 12 of our version (that is, the printed number 12 on the bottom of the page, not the pdf generated numbers).

Page 31, Lines 650-667: This may be somewhat true for field experiments but less-so for lab-based experiments, especially those conducted under GLP guidelines with extensive validation.

This is encouraging to hear, but we're not sure whether information supporting this observation have made it into the open literature. The Owen (2010) rainbow trout study referenced was conducted under GLP, so we think these points are at least sometimes relevant.

***Perhaps a good point of reference would be the requirement within a number of FIFRA ecotox protocols to have a positive control test conducted on a defined schedule to ensure laboratory performance. In such studies the performance of the positive control needs to be consistent with historical data and within the bounds of performance acceptability criteria for the lab to be considered competent to perform the studies. For example, in OPPTS 850.3020 (Honey Bee Acute Contact Toxicity): "A concurrent positive control with a substance of known toxicity is not required. However, a quarterly or semiannual test with a laboratory standard (reference toxicant) is recommended as a means of detecting possible interlaboratory or temporal variation. A laboratory standard is also recommended when there is any significant change in source of bees"***

In the "Reproducibility" section, we added a sentence on the benefit of positive controls.

Page 36, Lines 746-756: Are the authors referring to the actual "raw" data here or summarized data? Best to specify.

Added several sentences explaining that most often, when researchers ask for "raw data" they probably really want a detailed data summary.

***Not sure that is entirely accurate, my experience has always been to request, or have requested, the entire raw data compilation.***

In context, we are probably thinking of the same way as Reviewer 4, but the sentence wasn't clearly written. Replaced it with an example of what constitutes "raw" data in a typical toxicity test. Otherwise, we think the wording in the paragraph is OK. "Raw data" may vary depending on the question and context. For example, in a toxicity test, counts or measurements from each replicate and all discrete, measured chemical values would likely be considered "raw data." We (mostly) take the concentrations that the chemists tell us, and don't really want the raw

instrument records of GC-MS time elution graphs or the raw spectral plots from an ICP-MS. If the study were into comparative performance of different chemical methods, “raw data” would mean something else.

Page 37, Line 780: “manipulation” sounds a little shady, do you mean evaluation?

I was thinking more of transformations and standardizations that need to be done before statistical analyses, how to handle missing data, non-detects. No change was made.

**Still sounds shady (and not like the Real Slim Shady), perhaps data transformation or handling or something...**

Replaced data manipulation with “data reduction and data standardization.” We do cite a wide variety of sources, but not The Real Slim Shady.

Page 37, Lines 780-787: This is where establishing criteria for evaluation *a priori* is critical (see Van Der Kraak et al. 2014 for example (Crit Rev Toxicol. 2014 Dec;44 Suppl 5:1-66. doi: 10.3109/10408444.2014.967836)

Already added reference to Moermond, which seems to cover similar ground.

**Similar, but not the same in my opinion. I could mistakenly sense some reluctance to cite Van Der Kraak et al., 2014, however, regardless of the subject matter content under evaluation, the principle of the review (i.e. quantitative weight of evidence with a priori established criteria and transparency of documentation) is quite important.**

*We added the Van Der Kraak citation as the reviewer has persistently suggested. We agree that Van der Kraak did a nice job in their Table 1 of laying out tangible criteria for critically rating literature. Reviewer 4 is perceptive – we were reluctant to cite another salvo between the atrazine combatants, as citation is a form of signaling (as Reviewer 2 noted, taking exception to another one of our citations). Also, we wondered just how “a priori” Van der Kraak’s decision criteria truly were since most of the ground evaluated had been well trod by some of those authors before that paper. Nevertheless, we agree that Van der Kraak’s Table 1 gives a nice example of a rating scheme that can be applied objectively and transparently in critical reviews.*

## Editorial Office

Comments to the Author

- Footnotes are not allowed in the text. Please incorporate the footnotes into the main body. [OK](#)

- The citation on page 2 is for Huff and Geist (1954) but the reference has the names Huff and Geis. (no "t"). Please correct. [Done](#)

- Figures 1 & 2 are low resolution, 72 dots per inch (dpi). Figures should have a minimum resolution of 300 dpi to ensure high quality reproduction in the typeset article.

I reloaded the files with the highest resolution that was provided to me.

\*\*\*\*\*



## **Responses to reviews of the original submission of “*Scientific Integrity Issues in Environmental Toxicology: improving research reproducibility, credibility, and transparency*”**

### **Reviewer 1**

#### Comments to the Author

This is a well-written manuscript that deals with an important issue. I have a few comments:

1. Both “scientist” and “researcher” is used in the manuscript. Are these used as synonyms or are you referring to different groups? Sometimes I got the impression that you were talking about academic researchers and sometimes a broader group, i.e. those publishing in peer-reviewed journals. Please clarify.

We think the context is reasonably clear that we mean “scientists,” which is broader than academic researchers, generally referring to anyone who is engaged in scientific pursuits and publishes in peer-reviewed journals.

2. Provide references to the biomedical research mentioned in row 75.

Most of the 32 cited examples from lines 50-65 relate to biomedical research, as do the 2 citations following in the same paragraph at lines 81-84. Thus, the point seems sufficiently referenced without further cluttering the prose.

3. The whole section on row 392-404 lacks references. This is especially problematic since it includes harsh allegations. Provide references or rephrase.

Added citations supporting statement that site remediation can be in the hundreds of millions or more (Gustavson 2007, ES&T “Superfund and mining megasites”; NYT – [GE spent \\$1.6B USD dredging PCBs in the Hudson River](#)). The suggestions that such tremendous financial consequences might actually have some effect on how scientific data are scrutinized are hardly “harsh allegations.”

4. The section on row 429-445 lacks a critical discussion of the implications (for credibility and scientific integrity) of having industry-funded research (industry control 40% of the research in the US) and education.

We think we do touch on the dual potential benefits and pitfalls of industry funded research, and have added another sentence on the need and benefit of full transparency

5. The section on row 455-481 should also include a couple of sentences on the numerous cases of misconduct from the chemical industry, to clarify why it could be relevant to consider the funder of the study. Examples of misconduct include perfluorinated chemicals, trichloroethylene, formaldehyde, styrene, dibromochloropropane, 1,3-butadiene, chromium (VI), benzene, vinyl chloride, lead, pharmaceuticals, asbestos, beryllium, and tobacco.

We’ve worked in more examples, limited to a few in the open literature which do not appear to be actively disputed. Some of the examples suggested by the reviewer are contested and this review/commentary is not the place for original research of science misconduct allegations.

6. Row 520: Add that the cost of attending meetings and conferences is a major concern for NGOs.

Good point; we added a statement to the text.

7. The section on reproducibility on row 608. Add the reference by Moermond et al. (CRED method) since it includes a list of reporting recommendations to authors of ecotoxicity studies that has the possibility to enhance reproducibility of studies.

Good suggestion, added

8. The “implicit claim by researchers” mentioned on row 710 is an ill-disposed interpretation that should be left out of this manuscript.

It is intended to be provocative to readers that presenting a study without supporting data is effectively a “trust me” claim. Doubtfully all will agree

9. Provide a reference on the attitude change mentioned on row 713.

Changed to more accurately state the historic limited details in scientific papers was due publication constraints rather than changes in attitudes

10. Row 823: Systematic review methodology is now being used also for chemical assessments. Environmental International has a new editor, Paul Whaley, that has addressed this in several publications that should be cited, e.g.

A primer on systematic reviews in toxicology Hoffmann, S., de Vries, R.B.M., Stephens, M.L., Beck, N.B., Dirven, H.A., Fowle, J.R., Goodman, J.E., Hartung, T., Kimber, I., Lalu, M.M., Thayer, K.A., Whaley, P., Wikoff, D., Tsaioun, K. 07/2017 In: Archives of Toxicology. 91, 7, p. 2551-2575. 25 p.

Raising the standard of systematic reviews published in Environment International Whaley, P., Letcher, R.J., Covaci, A., Alcock, R. 12/2016 In: Environment International. 97, 3 p.

Assuring high-quality evidence reviews for chemical risk assessment: five lessons from guest editing the first environmental health journal special issue dedicated to systematic review

Whaley, P., Halsall, C.J. 07/2016 In: Environment International. 92-93, 3 p.

Implementing systematic review techniques in chemical risk assessment: challenges, opportunities and recommendations. Whaley et al.

We appreciate having this work pointed out. Added citation to the “Implementing” paper.

\*\*\*\*\*

## Reviewer: 2

### General Comments:

The manuscript is an excellent review of the issue of scientific integrity. However, it is rather long and loosely organized. What is the purpose other than literature review? The abstract promises a framework, but the word does not even appear in the rest of the paper. The last sentence of the introduction seems to set a goal of relating remedies for nuanced issues in scientific integrity from other sciences to SETAC’s science. That is done but not clearly or consistently. (The sentence itself is unclear.) Eleven points related to transparency are presented in the last section. It is not clear whether these are the promised remedies from other sciences or if the remedies are limited to transparency. If the conclusions all concern transparency, why discuss bias, rigor, relevance, etc.? Is transparency the solution to all scientific integrity issues? In sum, the paper reads like a committee effort: lots of good

information that feels somewhat thrown together. One of the authors should do a major rewrite to tighten up the organizational logic.

There are suggestions and recommendations scatter through the text. They do not appear consistently at the end of sections and good ideas (e.g., videos of the methods) are not distinguished from recommended or required practices.

We've tried to clean up these points to keep the logic logical and the flow better. Specifics follow.

Specific Comments:

Title. Why just toxicology and not Chemistry? The text frequently refers to SETAC. Is integrity not an issue in chemistry or less of an issue?

That's a fair criticism. We agree that chemistry has its own issues, and added a section on readily available pitfalls in environmental chemistry. We also added "chemistry" to the title of the article.

25 Where is the framework? This is the only place that the term is used.

Framework was probably not the best term. Removed.

29 How have recent elections shown that large segments of society distrust science? In the U.S., Trump said that global warming is a hoax but I have not seen any evidence that his election hinged on that position. I have not heard of any election in which scientific integrity was a major issue.

The sentence doesn't imply anything about specific issues being in play in the US elections, but that large fractions of electorates do not trust in "experts." Added citation to Nichols 2017, (Death of Expertise) who specifically discusses the discounting of "experts" in UK's Brexit vote

41-43 This may be intended as a joke. It misrepresents Socrates. His dialogues are exercises in essentialist argument and do not rely on evidence. Perhaps you are thinking of Aristotle who was an empiricist and proto-scientist.

Fine to remove, as I am not a classical scholar. The point was that he was put to death for his views/teachings which contradicted mainstream thought

45 Archaeoraptor was never a scientific discovery. It was synthesized by a farmer/collector in China and bought by a dinosaur enthusiast in the U.S. Its description was rejected by Nature and Science. It was published by National Geographic without checking the science. Creationists described it as a failure of science, but no scientist who looked at it or at images of it believed it was legitimate. The failure was that nobody warned National Geographic until they were in press and they did not check. Hence, it was never accepted by the scientific community nor by a peer-reviewed scientific journal. This is a picky comment but I am sensitive to this case because it is used regularly by creationists.

Yes, but the point is none of those examples were valid scientific discoveries, but at some points were presented as such. Amended to "purported discoveries."

50-64 This is a list of bad practices (called concerns) in science. The comment about beer at the end does not belong in that series.

Fine, deleted. We thought it ironic that studies have been published attributing beer as both causing and preventing cancer questioning the credibility of both. It was an attempt to slip in a bit of humor.

73 maintain should be maintaining  
Correction made.

106 You do not need to cite Kolok for “the dose makes the poison.” It is a common paraphrase of Paracelsus.

[Concur; citation deleted.](#)

115 Lackey’s contention that scientists should avoid normative concepts is naive. Environmental laws and regulations contain normative requirements. Scientists are required to operationalize concepts in environmental laws such as biotic integrity, impairment, and toxic effects. Business managers or government attorneys are not going to do that themselves.

[Revised to remove the citation here to Lakey’s advocacy of nonadvocacy. This is explored more in the section on advocacy.](#)

123-127 I do not consider this to be a deception. Journals do not want an account of a research program, most readers do not want it either and papers do not claim to present it. The methods are the methods that generated the reported results. Presenting all of the mistakes and failed methods would just be confusing.

[This is from a quote and presumably would be read as that one person’s viewpoint](#)

173 Misplaced period.  
Corrected.

244 The primary school norms are cute, but “practice makes perfect” is not reproducibility. I am not sure what is. Perhaps this is an exception to the hypothesis that we learned the needed norms as children. It is listed as a “profession-specific provision” in the first sentence. Perhaps those provisions should not be among the primary school norms.

[We agree that alluding to primary school norms and folk idioms only goes so far, but the purpose is to ground our discussion of scientific integrity in universal behaviors, rather than an emphasis on procedural. This and other attempts to bring humor and whimsy into the discussion are done deliberately with the hope that it will increase the likelihood of actually being read and thought about. Some of these attempts will undoubtedly bomb with some readers. Reworded, but largely retained.](#)

328-330 Awkward sentence.  
[Agree. Rewritten.](#)

349, 352 The “doubtfully” construction is awkward. I had to read the sentence in 349 twice.  
[Agree. Reworded](#)

409-412 Edit this very long and not entirely grammatical sentence.  
[Agree. Shortened.](#)

407-421 This seems to imply that scientists employed or contracted by natural resource trustee agencies stand to financially benefit from NRDA. Who has a financial incentive in the U.S.? Not the scientists or lawyers (who are just public service grunts) or regulators (regulators are not trustees so they have no standing). The situation is quite different from a product liability tort where the lawyers get a fraction of the take and expert witnesses are paid to present testimony to support one side. The leadership of the trustee agencies have an incentive to obtain funding to remediate the damages, but it does not line their pockets. NRDA is a scientific integrity issue to the extent that the scientists at trustee agencies are likely to be personally invested in the protection and restoration of natural resources.

However, that is a potential source of bias whether or not financial damages are involved. The situation may be like product liability torts in other countries, but I do not know.

This is a fair point and we revised it to split out NRDA from toxic torts.

482-484 I agree that scientists should not be dismissed based on their employment or funding. However, it is appropriate to look at the body of evidence in a case to determine whether there is a bias associated with the source of funding. If industry funded studies and foundation funded studies consistently come down on one side or the other (e.g., Atrazine), that should be noted and if possible it should be accounted for.

We think we've captured this point in the present text, following this sentence

522-523 Also, environmental advocacy groups conduct or fund little science. They mainly review other people's science, so they do not have much to present at a SETAC conference. They might also feel uncomfortable with the large industry presence. It would be interesting to know whether they go the less industry-dominated societies like the Ecological Society of America or Society for Freshwater Science.

That could be. I (cm) participated in SFS for several years and interacted with a few NGO representatives, who were advocates for insect or species conservation. Cost could be a major factor (noted by Reviewer 1). We haven't researched the point and don't want to go too far into this guessing.

531-532 Fix grammar

Fixed

581 Melvin et al (2009) is not a field study.

Good catch. Reworded. It with was with effluents and intended to inform environmental effects monitoring.

579-607 Parallel structure would make the 8 principles easier to read and understand. For example, only a few are complete sentences and two (4 and 7) are imperative case, but not others.

Rephrased as factors leading to rigor, and reworded to avoid the mix of cases

655-656 I do not have a lot of sympathy for this excuse. If it is impossible to produce the same effect twice in laboratory studies, can it really be called science? But you address that in the next paragraph.

We kept the wording as is. In toxicity testing, even standard test organisms can show quite different responses to very similar test organisms. For instance, USEPA's water quality criteria derivation guidance consider that if normalized toxicity test results of the same species differ by more than a factor of 10, it may be appropriate to reject some values. A factor of 10 is a large difference.

742-743 What if the author dies or is incapacitated? All data should be posted, in my opinion. See 760-762.

We tend to share that view, but are trying to build the case. Added a sentence pointing out that eventually all scientists die and that important data sets need not die with them.

868-883 The laws use normative terms. If an environmental toxicologist says only that something is changed without stating whether the change is adverse, he is not doing his job (note, he and his are indefinite masculine pronouns, not signs of sexism).

We think we've captured this point, and but added the point that laws and international agreements are inherently normative

935 practice (singular)  
Change made.

943 Which is it: avoid or not tolerate? They are very different recommendations.

True. We mean not tolerate

944-945 This is unclear.

Deleted this sentence which was the simplest resolution

960 Change to: Workshops and resulting publications.

Done

\*\*\*\*\*

### Reviewer: 3

I think this paper provides a nice overview of a lot of material related to scientific integrity in toxicology.

However, I have some concerns and suggestions.

One fundamental concern is that it's not entirely clear to me how all the different parts of the paper fit together. Parts of the paper seem like a review of the literature on scientific integrity related to environmental toxicology, but other parts of the paper seem like more of a commentary on how to promote integrity. Maybe it's OK to have multiple things going on, but I think the authors could do more to clarify how it all fits together and what the new points are that they are trying to defend.

Another concern is that the parts of the paper where they seem to be defending new points could be strengthened. In the abstract and introduction, the authors make it seem like their biggest new contribution is to conceptualize scientific integrity as an extension of personal integrity. Two thoughts: (1) I think this is a questionable move, because there's so much recognition nowadays that integrity is not just a personal, individual issue but also an institutional, community-level issue. (After all, the authors themselves note all the valuable things that SETAC can do to help promote integrity.) Thus, I think the authors should, at minimum, talk about integrity as a joint individual- and community-level enterprise.

True. Deleted the personal integrity wording from the abstract.

(2) I thought the authors' discussion of the concepts of relevance, rigor, reproducibility, objectivity, and transparency was one of the most interesting parts of the paper, so I think they should consider playing up those concepts in the abstract and introduction as a more central element of their positive account of scientific integrity in toxicology.

Concur; abstract has been significantly reworded.

Speaking of relevance, rigor, reproducibility, objectivity, and transparency, somehow I missed the discussion of objectivity. Did they skip over it accidentally and go directly from reproducibility to transparency? I'd also encourage the authors to consider their list of recommendations at the very end of the paper. It seemed like kind of a mish-mash of different ideas from throughout the paper. Is there any way to systematize or motivate that particular list of ideas a little better?

We think that objectivity is a thread throughout our arguments. Listing specific recommendations is a good idea.

Some smaller points, largely involving literature that might be good to cite or mention:

(1) Sheldon Krimsky's book *Science in the Private Interest* would be a good piece to cite when talking about concerns that industry-academic partnerships can be problematic (2) Resnik and Elliott have a piece on "Taking Financial Relationships into Account When Assessing Research" that discusses how research shouldn't automatically be dismissed because of the funding source

Concur Krimsky is relevant here. Resnick and Elliott's arguments were already made.

(3) Linda Birnbaum and colleagues have an important paper discussing an important issue that wasn't discussed much in the "relevance" section of the article. Specifically, they point out that a lot of the standardized toxicology studies done for regulatory purposes may not actually provide very good indications of risk in humans with diverse genetics being exposed to chemical mixtures. See Birnbaum et al, "Informing 21<sup>st</sup> Century Risk Assessments with 21<sup>st</sup> Century Science"

It is an important paper, but they're taking on huge and somewhat different questions – better rigor in animal models for informing human health risks, better use of epidemiology, better use of molecular tools to predict clinical-level effects. In our context, which emphasizes ecotoxicology, it might confuse readers. We didn't add it.

(4) An interesting opinion piece promoting industry collaborations with academics as beneficial is: Edwards, "[Reproducibility: Team up with Industry](#)"

Yes, we appreciate you pointing this article out. While not all aspects of this big-money human health genomics work would apply to the typically much smaller ecotox experimental world, some are probably universal such as mandating data sharing and defining quality criteria. We added mention of some of the relevant features.

(5) In the authors' discussion of transparency, I think they need to provide more emphasis on the problematic fact that most toxicology studies done for regulatory purposes are not published or made public (although there's an important initiative by Bayer to make more of their data available; see <https://croppscience-transparency.bayer.com/> )

Both of these were mentioned. The Bayer transparency note was promoted from a footnote to the main text.

(6) For the discussion on advocacy, it would be wise for the authors to cite Roger Pielke's book *The Honest Broker*, which discusses strategies for scientists to avoid falling into inappropriate advocacy

Reasonable point. It's a high-profile book and some have reviewed it favorably. We have added a reference to this text in the discussion about "stealth advocacy"

\*\*\*\*\*

#### Reviewer: 4

General: I enjoyed reading this article, I found the content and expressed perspectives to be balanced, thoughtful and insightful. Moreover, the multi-partite authorship composition, reflecting the many sectors that constitute the society, conveyed a sense of consensus view. I have provided a number of specific suggestions/comments/questions below, however, the most significant detraction from the

manuscript is the lack of consideration/focus on education. SETAC (in my opinion) as an entity has evolved into a more student oriented venue, relatively speaking, and given the greater focus on students (participation and consideration) I was a little surprised at the lack of specific focus on this demographic. I fully support the content and perspectives conveyed by the authors, but I don't think we can achieve broader success as a Society unless there is a concerted effort to instill this ethos in students, which requires a strategy for education. The tenants of science and scientific method need consistent reinforcement beyond just the 'SETAC crowd' and this is best achieved in the classroom in addition to conferences and workshops. I would encourage the authors to consider this point and reflect it as appropriate in the article. Other than that my comments are pretty minor and feel the article is acceptable with revision.

Upon reflection, we concur we gave the education strategy short shrift. We added a brief section about strategy for education of early-career scientist and reinforcement for latter career scientists.

Specific (note author page and line numbers used, not the automated ones):  
Page 1, Line 21: ...such as poor reliability/reproducibility and bias.

OK, changed

Page 2, Line 29: Whatever do you mean?

Added another citation on that point (book, "Death of Expertise").

Page 2, 3: Although it is eluded to it would be of value to illustrate how sensationalism has been incentivized. Personally I think there is immense pressure put on tenure track professors and tenure package reviews are often gauged by H-index, impact factor etc., and unfortunately this (in my opinion) has led to an incentivizing of sensational results. It is a peculiarity that many sensational (and I don't presume to suggest sensational necessarily equals questionable) research findings are pre-empted by news briefs and press releases before the article is even published (i.e. publicly evaluated). This is not to suggest undue institutional pressure, but given the metrics for evaluation, the more sensational the findings, the greater the media coverage, the higher the proportion of citations, H-index and so on and so forth. Personally I think this is a dubious practice, but it seems to be becoming more common. There was a recent article in the journal Ecotoxicology by Hanson et al entitled "Evidence of citation bias in the pesticide ecotoxicology literature" that was quite interesting and may be of value for the author's to consider as a perspective.

In early drafts, we went into some detail on publication pressures and practices, but the manuscript was becoming unwieldy with length, so we pulled out most of the publication practice material. We intend to address publication matters more in a separate manuscript. We appreciate pointing out the 2018 article which we hadn't yet seen, and we agree it likely is highly relevant.

Page 9, Line 190: What are the peer-review procedures in place to identify and address FFP? Does this vary by journal on a case by case basis? I can only feature the Andrew Wakefield saga where a full retraction by The Lancet was issued for his falsified 'seminal' research linking vaccines and autism...a perception that unfortunately persists to this day at the expense of public health and safety.

Unfortunately, peer-review will seldom catch outright fabrication or fraud. This will probably only be found out through post-publication scrutiny.



Page 10, Lines 216-219: What about the Freedom of Information Act (FOIA)? This is an oft-used mechanism to obtain transparency within the Federal Government.

True, when used to pry raw data or code that would help with analyses and reproducibility and when aimed at scientists. It also is a venue for harassment through vexatious demands for notes, emails, etc. We mention the double-edged sword of transparency in the “Weaponizing scientific integrity section.”

Page 11, 233-234: cooking data...I think the degree or imposition of this issue is dependent on whether or not the criteria, assumptions, and uncertainties were disclosed and if this was done so *a priori*

At those lines, the cleaning or cooking of data is posed as rhetorical question which we come back to in the bias section.

Page 14, Page 301-304: Do the author’s feel that such disclosures should be universal regardless of funding source and affiliation? It has been my experience that for industry funded projects or collaborations the requisite degree of disclosure (conflicts of interest etc.) are quite onerous relative to other sectors. Would it be reasonable to suggest a more generally prescriptive approach that is consistent across sectors and reflective of equality?

Perhaps we are naïve, but our suggestion is that for most people and situations regardless of where the funding came from, a more prescriptive approach is doubtfully helpful. Instead we argue “simple, unambiguous statements of the funding sources that directly or indirectly allowed the work to be completed should generally be sufficient.”

Page 16, Line 337: ...can influence scientists to modify their perception and thinking

Concur; change made.

Page 16, Lines 345-346: Again, as described earlier for other sectors, there tends to be a bias towards studies demonstrating significant effects vs those that don’t. Obviously if you are a drug maker you’re much less likely to publish a non-significant therapeutic effect, which unfortunately is lost information that could have informed other approaches. As with the sensational, perhaps the scientific community should aspire to the more fundamentally neutral, valuing the non-significant equally to the significant.

We expanded on this a little, pointing out that study results that favor the interests of the funder don’t necessarily imply experimental bias, they might just have greater expertise with the chemical.

Page 17, Lines 360-316: This sentence reads oddly/awkwardly

Checked and edited.

Page 17, Lines 364-365: I can appreciate the obviousness of this example, but the Aviv article was anything but balanced, and conveying citations as if weighted equally in terms of content, rigor, reproducibility etc. is a little disingenuous.

The goal is to lead readers to sources on a conflict in the science, not to attempt to referee which is more persuasive. However, we concur that the Aviv article could be replaced from more scholarly literature. Removed it, and added peer reviewed sources from both camps: Rohr & McCoy (2010), Bero et al 2016, Hanson et al (2018)

Page 18, Lines 383-384: Why “particularly when funded by sponsors with financial interests in the findings”? In what situation does a ‘funder’ not have interest in the findings? This seems to be venturing into the realm of the subjective here

In my (cm) experience with government-funded research (other than NRDA), the funding entity does not stand to directly gain or lose financially from the study outcomes. They just want a reliable answer to their questions, not a particular answer. No changes made.

Page 18, Lines 384-389: These are artifacts of scale, resolution, technical precision as well as matters of policy. Risk assessments are often screening level by design in order to minimize type-II errors, but seldom move to higher tiers of refinement because there is no established mechanism for interpretation and incorporation.

That's a perceptive point, but to actually work it into the text would require expansion and additional literature searching and citing. The manuscript had gained weight as it is through responses to review suggestions, and in consideration, we think it best to leave this paragraph as is.

Page 19, Lines 405-421: I feel like the concept of litigation has not been adequately addressed thus far (it is only briefly touched on here). Action by litigation is often touted as an effective tool to bring about scientific, regulatory, or policy action, but it is categorically abused, primarily in the U.S. There are cases where litigation is absolutely necessary, particularly in ensuring human and environmental health, but when taken advantage of by thinly veiled interest groups to support litigious enterprises that's problematic and detracts from scientific objectivity and integrity.

That's a reasonable point. Added a mention of the hired guns and biased research associated with toxic torts in the subsection "*Some particularly challenging situations in ecotoxicology*"; also touched on in the "Weaponizing transparency" section

Page 20, Lines 423-428: As a point of reference it may be worth mentioning the Gold King mine spill here as well.

I had looked into that, but it didn't really fit the point. The references linked to on Mount Polley, in contrast, have quite a "bad science" drama to them. Litigation from Imperial Metals asserted faulty design, bad science and engineering by their consultant Knight Piesold, who designed the tailings facility. Knight Piesold in turn argued that in the years since their design and initial construction, Imperial Metals raised the height of the dam without their consultation, which cut into the safety margins of the dam construction review.

Page 22, Lines 446-466: I agree, but...what about other collaborating entities such as NGOs, do the same issues/considerations apply?

In concept, they do although in practices NGOs usually don't have funding to support research. The Van Kirk episode (lines 470-480 in the original submission) was from an academic-NGO collaboration. It didn't go well.

Page 23, Line 490-493: This seems like an ideal place to discuss 'research contracts', which could loosely be analogous to a marriage certificate of sorts. Personally, I have been involved in establishing numerous research contracts with a variety of academic institutions and all have advocated for academic freedom. I think there is a perception that such contracts are highly restrictive, but again that has not been my experience.

We haven't made any efforts to research this point and only have our own experiences which are mostly in line with the comment. Added a line to note that such contracts often establish expectations of academic freedom.

Page 25, Lines 527-529: I'm not sure I agree with this statement, I don't think it is purely subjective. For example, if you consider the Sir Austin Bradford Hill criteria for causality, these are not purely subjective considerations to gauge scientific merit.

The "subjective judgment" isn't essential to the sentence's meaning and was removed, to wit:  
*"While "scientific integrity" is ultimately a subjective judgment that cannot easily be reduced to review checklists, ...*

Page 26, Line 552: I think 'sensational' is more accurate and appropriate here than surprising, or at least surprising and/or sensational.

Agree. Added "sensational" to read "sensational or at least surprising."

Page 26, Lines 549-561: Again suggest to consider Hanson et al. 2018 here (<https://doi.org/10.1007/s10646-018-1918-4>)

We aren't really taking on the publication bias issue here. We're a bit cautious invoking that study since the publication bias explored by Hansen et al. focused on papers by some of the same authors or collaborators, which muddies the publication bias angle. We plan to come back to publication bias and more questionable publication practices in a follow-up article.

Page 28, Line 579: First I think it is more fundamental to have a basic understanding of the need for experimentation...why are we asking the question(s) – should precede considerations for design Page 28, Lines 579-592: What about thoroughly vetting the available literature etc. to inform questions and study design? Understanding the issues to ask informed questions is the first step in my opinion

Good point. We added these thoughts as new #1 in the list.

Page 30: Again, designing a robust, reliable, reproducible experiment is dependent on thoroughly understanding the question(s) being posed. Inability to understand the question leads to vague and often misguided experimentation that undermines the scientific process. Asking a novel question does not preclude the application of scientific rigor; we need greater educational training of scientific method.

Worked these thoughts into new #2.

Page 31, Lines 650-667: This may be somewhat true for field experiments but less-so for lab-based experiments, especially those conducted under GLP guidelines with extensive validation.

This is encouraging to hear, but we're not sure whether information supporting this observation have made it into the open literature. The Owen (2010) rainbow trout study referenced was conducted under GLP, so we think these points are at least sometimes relevant.

Page 32, 672-682: Suggest to also include an example where a claim of anomalous reporting was in-fact falsified.

We think that might be kicking a hornet's nest that's best left at a little distance. It's hard to say when incongruent results falsify one another, such as the atrazine and frogs controversy from line 365 (in the original version). Even in some situations which as a near-outsider seem resolved such as the bacteria-arsenic-phosphorus controversy, or inflated pharmaceutical concentrations (see the new material on Environmental Chemistry) despite the failure of other researchers to repeat anything close to the original findings, the original authors seem to still think they were right and the others have technique or other limitations.

Page 36, Lines 746-756: Are the authors referring to the actual “raw” data here or summarized data? Best to specify.

Added several sentences explaining that most often, when researchers ask for “raw data” they probably really want a detailed data summary.

Page 36, Lines 758-759: Sentence reads oddly/awkwardly

Reworded. Hopefully it’s clearer

Page 37, Line 780: “manipulation” sounds a little shady, do you mean evaluation?

I was thinking more of transformations and standardizations that need to be done before statistical analyses, how to handle missing data, non-detects. No change was made.

Page 37, Lines 780-787: This is where establishing criteria for evaluation *a priori* is critical (see Van Der Kraak et al. 2014 for example (Crit Rev Toxicol. 2014 Dec;44 Suppl 5:1-66. doi: 10.3109/10408444.2014.967836)

Already added reference to Moermond, which seems to cover similar ground.

Page 38, Lines 792-799: So use Google scholar (I agree)? Or is the point to use multiple search resources?

Yes, one should use Google scholar to discover literature, but we can’t directly say so. US government authors such as the first author are specifically prohibited from endorsing specific products, firms, or services. Regardless of this specific prohibition, search engines and their performance may rapidly change, and more specific recommendations could become quickly dated.

Page 39, Line 817: The EPA Mid-Continent Ecotox Database is quite useful, but there are no strict review criteria for inclusion of data and users ought to be aware of this...just because you can find it in the EPA database doesn’t necessarily mean is credible.

We wholeheartedly agree, but also think the existing text captures this point adequately that uncritical reliance on this or any secondary sources can introduce or perpetuate errors.

Page 39, Line 828: “science can never answer “should” questions, but can inform issue.

Good point. Amended to include.

Page 42, Line 896: “Covert advocacy”...what about explicit advocacy? I agree that advocacy should be minimized in principal, but if it is obvious and explicit at least one acknowledges a position.

We’re making the argument that explicit advocacy is a personal and situational decision.

Page 43, Lines 918-922: Lawsuits by who? I think the authors need to expand a little on the litigation issues as a whole.

We added one more citation to a harassing lawsuit of a private researcher (Robbins) and earlier had added a short-section on toxic torts, cautioning that litigation-support science is questionable at best. But generally, it’s become a fairly lengthy article as is, and we only scratch the surface of important topics such as this. We think that readers will find the several references are useful leads to more reading.

Page 44: It is a little surprising to see that a focus on education a crucial and fundamental mechanism to ensure scientific method and enhance scientific integrity has been omitted here. I think this is a major

oversight and the authors really need to focus on education as a concept and strategy to reinforce not only the tenants of science but the perspectives they have comprehensively conveyed in this manuscript. I think this manuscript is valuable and I largely agree with the authors, but it is not going to be useful in practice unless there is a greater focus on students with consistent and compelling messaging.

We think this is a good point and we were remiss in not being more direct. We added a section on education and enforcement.

Page 44, Point #2: Nice alliteration! ☺

Rrrr! Thanks.

Page 44, Point #5: ...that could contribute to, or be perceived as, bias. Also, as a general principal conflict should be avoided but that is not always possible and requires further consideration of tact, morals and ethics.

Good point. Reworded as suggested to make it more explicit to avoid conflicts when possible.

Page 45: Another seeming omission is the lack of perspective on enforcement? Self-enforcement, institutional-enforcement, peer-review-enforcement...all of the above?

Good point. All of the above, plus professional society to some extent. Worked it into the Education section.

**Integrated Environmental  
Assessment and Management**

**Scientific Integrity Issues in Environmental Toxicology and  
Chemistry: improving research reproducibility, credibility,  
and transparency**

|                               |                                                                                                                                                                                                                                                                                                                                                                                                                                                                                                                                                                                                                                                                                                                                                                                                                                                                                                                                                                                                                                                                           |
|-------------------------------|---------------------------------------------------------------------------------------------------------------------------------------------------------------------------------------------------------------------------------------------------------------------------------------------------------------------------------------------------------------------------------------------------------------------------------------------------------------------------------------------------------------------------------------------------------------------------------------------------------------------------------------------------------------------------------------------------------------------------------------------------------------------------------------------------------------------------------------------------------------------------------------------------------------------------------------------------------------------------------------------------------------------------------------------------------------------------|
| Journal:                      | <i>Integrated Environmental Assessment and Management</i>                                                                                                                                                                                                                                                                                                                                                                                                                                                                                                                                                                                                                                                                                                                                                                                                                                                                                                                                                                                                                 |
| Manuscript ID                 | IEAM-2018-029-CR.R1                                                                                                                                                                                                                                                                                                                                                                                                                                                                                                                                                                                                                                                                                                                                                                                                                                                                                                                                                                                                                                                       |
| Wiley - Manuscript type:      | Critical Review                                                                                                                                                                                                                                                                                                                                                                                                                                                                                                                                                                                                                                                                                                                                                                                                                                                                                                                                                                                                                                                           |
| Date Submitted by the Author: | 16-Sep-2018                                                                                                                                                                                                                                                                                                                                                                                                                                                                                                                                                                                                                                                                                                                                                                                                                                                                                                                                                                                                                                                               |
| Complete List of Authors:     | Mebane, Christopher; National Oceanic and Atmospheric Administration, Sumpster , John; Brunel University<br>Fairbrother, Anne; Exponent, EcoSciences<br>Augspurger, Tom; USFWS<br>Canfield, Timothy; US Environmental Protection Agency, National Risk Management Research Laboratory, Ground Water and Ecosystems Restoration Division<br>Goodfellow, William; Exponent Inc<br>Guiney, Pat; Guiney<br>LeHuray, Anne; Chemical Management Associates LLC<br>Maltby, Lorraine; University of Sheffield, Department of Animal and Plant Sciences<br>Mayfield, David; Gradient, Toxicology<br>Ortego, Lisa; Bayer CropScience LP<br>McLaughlin, Mike; CSIRO/University of Adelaide,<br>Schlekat, Tamar; Society of Environmental Toxicology and Chemistry<br>Scroggins, Rick; Environment Canada,<br>Verslycke, Tim; Gradient,                                                                                                                                                                                                                                               |
| Keywords:                     | reproducibility, bias, transparency, research integrity, scientific integrity                                                                                                                                                                                                                                                                                                                                                                                                                                                                                                                                                                                                                                                                                                                                                                                                                                                                                                                                                                                             |
| Abstract:                     | High profile reports of detrimental scientific practices leading to retractions in the scientific literature contribute to lack of trust in scientific experts. While the bulk of these have been in the literature of other disciplines, environmental toxicology and chemistry are not free from problems. While we believe that egregious misconduct such as fraud, fabrication of data, or plagiarism is rare, scientific integrity is much broader than the absence of misconduct. We are more concerned with more commonly encountered and nuanced issues such as poor reliability and bias. We review a range of topics including conflicts of interests, competing interests, some particularly challenging situations, reproducibility, bias, and other attributes of ecotoxicological studies that enhance or detract from scientific credibility. Our vision of scientific integrity encourages a self-correcting culture promoting scientific rigor, relevant reproducible research, transparency in competing interests, methods and results, and education. |

1  
2  
3  
4  
5  
6  
7  
8  
9  
10  
11  
12  
13  
14  
15  
16  
17  
18  
19  
20  
21  
22  
23  
24  
25  
26  
27  
28  
29  
30  
31  
32  
33  
34  
35  
36  
37  
38  
39  
40  
41  
42  
43  
44  
45  
46  
47  
48  
49  
50  
51  
52  
53  
54  
55  
56  
57  
58  
59  
60

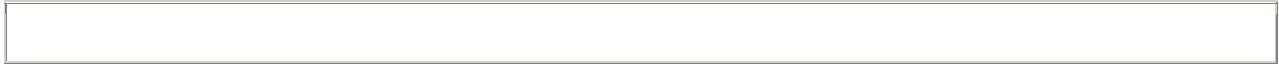

SCHOLARONE™  
Manuscripts

# Scientific Integrity Issues in Environmental Toxicology and Chemistry: improving research reproducibility, credibility, and transparency

Christopher A. Mebane<sup>1</sup>, John P. Sumpter<sup>2</sup>, Anne Fairbrother<sup>3</sup>, Thomas P. Augspurger<sup>4</sup>, Timothy J. Canfield<sup>5</sup>, William L. Goodfellow<sup>6</sup>, Patrick D. Guiney<sup>7</sup>, Anne LeHuray<sup>8</sup>, Lorraine Maltby<sup>9</sup>, David B. Mayfield<sup>10</sup>, Michael J. McLaughlin<sup>11</sup>, Lisa Ortego<sup>12</sup>, Tamar Schlekot<sup>13</sup>, Richard P. Scroggins<sup>14</sup>, Tim A. Verslycke<sup>15</sup>

<sup>1</sup>U.S. Geological Survey, Boise, ID USA; <sup>2</sup>Brunel University London, UK; <sup>3</sup>Exponent Inc., Bellevue, WA, USA; <sup>4</sup>U.S. Fish and Wildlife Service, Raleigh, NC USA; <sup>5</sup>U.S. Environmental Protection Agency, Ada, OK USA; <sup>6</sup>Exponent Inc., Alexandria, VA USA; <sup>7</sup>University of Wisconsin, Madison, WI USA; <sup>8</sup>Chemical Management Associates LLC, Alexandria VA, USA; <sup>9</sup>University of Sheffield, Sheffield, UK; <sup>10</sup>Gradient, Seattle, WA, USA; <sup>11</sup>University of Adelaide, Adelaide, South Australia, Australia; <sup>12</sup>Bayer, Crop Science Division, Research Triangle Park, NC, USA; <sup>13</sup>SETAC, Pensacola, FL USA; <sup>14</sup>Environment and Climate Change Canada, Ottawa, ON, Canada; <sup>15</sup>Gradient, Cambridge, MA, USA

## Abstract

High profile reports of detrimental scientific practices leading to retractions in the scientific literature contribute to lack of trust in scientific experts. While the bulk of these have been in the literature of other disciplines, environmental toxicology and chemistry are not free from problems. While we believe that egregious misconduct such as fraud, fabrication of data, or plagiarism is rare, scientific integrity is much broader than the absence of misconduct. We are more concerned with more commonly encountered and nuanced issues such as poor reliability and bias. We review a range of topics including conflicts of interests, competing interests, some particularly challenging situations, reproducibility, bias, and other attributes of ecotoxicological studies that enhance or detract from scientific credibility. Our vision of scientific integrity encourages a self-correcting culture promoting scientific rigor, relevant reproducible research, transparency in competing interests, methods and results, and education.

## Introduction

Highly polarized recent elections in Europe and North America have shown that large segments of society are distrustful of scientific and other experts. Some have suggested that we are in a culture in which reality is defined by the observer and objective facts do not change peoples' minds, and those that conflict with one's beliefs are justifiably questionable (Campbell and Friesen 2015; Nichols 2017). Science and scientists have been central to these debates, and the boundaries of science, policy and politics may be indistinct. In a social climate skeptical of science, the easy availability of numerous reports of dubious scientific practices gives fodder to skeptics. Because environmental regulations on use of chemicals and waste management rely heavily on the disciplines of ecotoxicology and chemistry, the integrity of the science is of utmost importance. Here we discuss scientific integrity in the applied environmental sciences,



1  
2  
3 38 with a focus on ecotoxicology and how the role and culture of the Society of Environmental  
4 39 Toxicology and Chemistry (SETAC) may influence such issues.

6 40 Science has long endured questionable science practices and a skeptical public. Galileo's  
7 41 criticisms of prevailing beliefs resulted in his issuing a public retraction of his seminal work. In  
8 42 contrast, purported science "discoveries" such as Piltdown Man, canals on Mars, cold fusion,  
9 43 Archaeoraptor, homeopathic water with memory, arsenic-based life, and many others have not  
10 44 stood the test of time (Gardner 1989; Schiermeier 2012). By 1954, Huff and Geist (1954)  
11 45 illustrated how the presentation of scientific data could be manipulated to become completely  
12 46 misleading yet accurate. Are things worse now? Recent articles in both the scientific literature  
13 47 and popular print and broadcast venues paint a bleak picture of the status of science. One does  
14 48 not have to search hard to find plenty of published concerns about the credibility of science.  
15 49 These include overstated and unreliable results (Harris and Sumpter 2015; Henderson and  
16 50 Thomson 2017; Ioannidis 2005), conflicts of interest (Boone et al. 2014; McGarity and Wagner  
17 51 2008; Oreskes et al. 2015; Stokstad 2012; Tollefson 2015), profound bias (Atkinson and  
18 52 Macdonald 2010; Bes-Rastrollo et al. 2014; Suter and Cormier 2015a, b), suppression of results  
19 53 to protect financial interests (Wadman 1997; Wise 1997), deliberate misinformation campaigns  
20 54 as a public relations strategy for financial or ideological aims (Baba et al. 2005; Gleick and  
21 55 co-authors 2010; McGarity and Wagner 2008; Oreskes and Conway 2011), political interference  
22 56 with or suppression of results from government scientists (Hutchings 1997; Ogden 2016;  
23 57 Stedeford 2007), self-promotion and sabotage of rivals in hypercompetitive settings (Edwards  
24 58 and Roy 2016; Martinson et al. 2005; Ross 2017), publication bias, peer review and authorship  
25 59 games (Callaway 2015; Fanelli 2012; Young et al. 2008), selective reporting of data or adjusting  
26 60 the questions to fit the data (Fraser et al. 2018), overhyped institutional press releases that are  
27 61 incommensurate with the actual science behind them (Cope and Allison 2009; Sumner et al.  
28 62 2014), dodgy journals (Bohannon 2013), and dodgy conferences (Van Noorden 2014).<sup>1</sup>

30 63 Such published concerns reasonably raise doubts about science and scientists and could even  
31 64 lead some to conclude that the contemporary system of science is broken. In writing this  
32 65 commentary, we attempt to address some prominent science integrity concerns in the context of  
33 66 environmental toxicology and chemistry. In our view, there is ample room for improvement  
34 67 within our discipline, but the science is not broken, and some criticisms are overstated. In writing  
35 68 this commentary, we do not pretend to have solutions that will overturn insidious pressures on  
36 69 scientists and funders for impressive results, or hold some moral high ground making us immune  
37 70 from such pressures ourselves, or that all of our own works are above reproach. Our  
38 71 recommendations are pragmatic, not dogmatic. Our goal is to nudge practices and pressures on

---

54  
55 <sup>1</sup> Throughout this commentary, citations are intended to be representative, without the "e.g." qualifier, which would  
56 otherwise be needed in nearly every instance.

1  
2  
3 72 scientists to advance the science, while maintaining and improving credibility through  
4 73 transparency, ongoing review, and self-correction.

5  
6 74 Many of the prominent science integrity controversies have been in the high stakes  
7 75 biomedical discipline, and in response that discipline probably has done more self-evaluation and  
8 76 taken more steps toward best practices than most other disciplines. Results of self-reported,  
9 77 anonymous surveys of scientists, mostly in the biomedical fields, have not been reassuring. In a  
10 78 2002 survey of early and mid-career scientists, 0.3% admitted to falsification of data, 6% to a  
11 79 failure to present conflicting evidence, and 16% to changing of study design, methodology or  
12 80 results in response to funder pressure (Martinson et al. 2005). A subsequent meta-analysis of  
13 81 surveys suggested problems were more common, with close to 2% of scientists admitting to  
14 82 having been involved in serious misconduct, and over 70% reported they personally knew of  
15 83 colleagues committing less severe detrimental research practices (Fanelli 2009). Serious  
16 84 misconduct such as fraud can occur in ecotoxicology just as with any discipline (Enserink 2017;  
17 85 Keith 2015; Marshall 1983) and when exposed, is universally condemned and, in many  
18 86 countries, is career ending. In contrast, the ambiguous, more nuanced issues of science integrity  
19 87 that all of us are likely to experience in our careers require thoughtful consideration, not  
20 88 condemnation. It is toward the latter that we discuss efforts toward remedies from other  
21 89 disciplines to examine similar issues in ecotoxicology, focusing on SETAC.

### 30 90 **What is “science” in the context of scientific integrity?**

31 91 Before we can discuss integrity in ecotoxicology and related environmental science fields, we  
32 92 must first distinguish what is meant by “science” in this context. Broadly speaking,  
33 93 environmental science includes the disciplines of biology, ecology, chemistry, physics, geology,  
34 94 limnology, mineralogy, marine studies, and atmospheric studies; i.e., the study of the natural  
35 95 world and its interconnections. The applications of environmental science extend to agriculture,  
36 96 fisheries management, forestry, natural resource conservation, and chemicals management, all of  
37 97 which have associated multi-billion-dollar industries and vocal environmental advocacy groups.  
38 98 The subdiscipline of environmental toxicology or ecotoxicology, pursued by SETAC scientists,  
39 99 studies in great detail how the natural world is influenced by chemicals, both natural and  
40 100 synthetic, introduced by human endeavors that are largely in pursuit of the production of desired  
41 101 goods and services (food, clean water, plastic products, metals, etc.). Because exposure to  
42 102 chemicals can have negative and sometimes unexpected consequences for people and the  
43 103 environment, a body of regulation has developed over the past century to control the kinds and  
44 104 amounts of allowable chemical exposures. Such regulations necessarily are based on scientific  
45 105 concepts such as Paracelsus’ directive that “the dose makes the poison” and physicochemical  
46 106 properties that influence transport and fate of substances. Because of the complexity,  
47 107 inexactitude, and uncertainty of ecotoxicology and associated sciences, rulemaking often is

1  
2  
3 108 subject to challenge, leading to accusations of profit over people or the environment or  
4 109 unreasonably restrictive and burdensome requirements. Scientists are called upon to inform  
5 110 disputes based on their knowledge or underlying principals or enter the conversation through  
6 111 self-initiated in-depth literature review and commentary. Only by conscientiously adhering to  
7 112 fundamental principles of the scientific method can environmental scientists maintain their  
8 113 integrity and continue to play a valid role in environmental policy and management.

### 12 13 114 **What is “scientific integrity”?**

14 115 Impeccable honesty is a fundamental tenet of science. When we read a paper, we might not  
15 116 agree with the conclusions, authors’ interpretations of its implications, importance, or many  
16 117 other things, but we have to be confident that the procedures described were indeed followed and  
17 118 all relevant data were shown, not just those fitting the hypothesis. Goodstein (1995) put it well:  
18 119 *“There are, to be sure, minor deceptions in virtually all scientific papers, as there are in all other*  
19 120 *aspects of human life. For example, scientific papers typically describe investigations as they*  
20 121 *logically should have been done rather than as they actually were done. False steps, blind alleys*  
21 122 *and outright mistakes are usually omitted once the results are in and the whole experiment can*  
22 123 *be seen in proper perspective.”*

23 124 Various professional and governmental organizations have established policies and definitions  
24 125 prescribing research integrity, responsible conduct of science, or scientific integrity. These may  
25 126 include broad statements of attributes such as the U.S. National Academy of Science’s (NAS) six  
26 127 values that they considered most influential in shaping the norms that constitute research  
27 128 practices and relationships and the integrity of science: objectivity, honesty, openness,  
28 129 accountability, fairness, and stewardship (NAS 2017). More specific “research integrity”  
29 130 guidelines define appropriate expectations of individual researchers and their institutions and  
30 131 may be highly procedural. Protecting the privacy, rights and safety of human research  
31 132 participants and animal welfare with institutional review board clearance requirements is a  
32 133 common element of research integrity guidelines. Academic research integrity guidelines have  
33 134 been established individually or in aggregate by research funders and individual institutions  
34 135 (ARC 2007; Goodstein 1995; NRC-CNRC 2013; NRC 2002; Resnik and Shamoo 2011; Steneck  
35 136 2006). Research institutions are usually responsible for investigating potential breaches of  
36 137 research integrity by its scientists, although this can create difficult conflicts of interest for the  
37 138 institution (Glanz and Armendariz 2017).

38 139 Whether research integrity guidelines should best be defined narrowly or broadly has been an  
39 140 area of controversy. As of 2015, 22 of the world’s top 40 research countries had national  
40 141 research conduct policies, all of which included fabrication, falsification, and plagiarism (FFP),  
41 142 with some going further. In this context, “fabrication” is making up data; “falsification” includes  
42 143 manipulating studies or changing or omitting data such that the record does not accurately reflect

1  
2  
3 144 the actual research; and “plagiarism” includes the appropriation of another person’s ideas,  
4 145 methods, results, or words without giving appropriate credit ([https://ori.hhs.gov/definition-](https://ori.hhs.gov/definition-misconduct)  
5 146 [misconduct](https://ori.hhs.gov/definition-misconduct)). The Research Councils of the UK has a lengthy list of misdeeds including FFP,  
6 147 misrepresentation, breach of duty of care, and improper dealing with allegations of misconduct,  
7 148 with many subcategories (NAS 2017). In contrast, from the 1980s to 2000, the National Science  
8 149 Foundation (US) had defined serious science misconduct broadly to include, “...*fabrication,*  
9 150 *falsification, plagiarism, or other practices that seriously deviate from those that are commonly*  
10 151 *accepted within the scientific community for proposing, conducting and reporting research*”  
11 152 (Goodstein 1995). The controversial part was the catchall phrase “*practices that seriously*  
12 153 *deviate from those commonly accepted...*” To the stewards of public science funds, such a  
13 154 catchall phrase was preferable to an itemized lists of all potential avenues of mischief, yet it  
14 155 raised the specter of penalizing scientists who strayed too far from orthodox thought (Goodstein  
15 156 1995). In 2000, this definition of disbaring research misconduct was narrowed to just  
16 157 “*fabrication, falsification, or plagiarism in proposing, performing, or reporting research*” with  
17 158 lesser offenses classified as questionable research practices. Other misconduct was defined as  
18 159 “*forms of unacceptable behavior that are clearly not unique to the conduct of science, although*  
19 160 *they may occur in the laboratory or research environment.*” Yet only FFP research misconduct  
20 161 findings were subject to reporting requirements to federal science funding agencies, with  
21 162 questionable science practices or other misconduct handled locally (NAS 2017; Resnik et al.  
22 163 2015).

23 164 In many countries, there is an active debate about whether a legal definition is appropriate for  
24 165 something that is really an academic judgment rather than a legal one. Denmark recently  
25 166 similarly narrowed its broad definitions of research misconduct to only FFP following high  
26 167 profile cases in which scientists succeeded in having their academic misconduct findings  
27 168 overturned in the courts. Yet if research conduct policies are considered “academic” without  
28 169 legal weight, institutions may have difficulty enforcing polices, such as when deliberate intent is  
29 170 required to be shown and the researcher claims “honest mistake.” For instance, the U.S. Office of  
30 171 Research Integrity found that a tenured professor had committed research misconduct by  
31 172 inappropriately altering data in five images from three papers. Yet when the university sought to  
32 173 terminate her, she fought back contesting the university’s procedures, and the university  
33 174 ultimately paid her \$100,000 USD to leave (Stern 2017). In private research, it is not obvious  
34 175 which scientific integrity concepts have the force of law. In an example from the U.S., testimony  
35 176 of egregious breaches of scientific integrity norms (including faking credentials and selective  
36 177 publication of only favorable results) was disallowed in a court dispute between two private  
37 178 companies because there was no federal law on scientific integrity (Krimsky 2003).

38 179 Unfortunately, the “other misconduct” that scientists may commit can reflect that of any work  
39 180 place, such as abuse of power; bullying, sexual coercion, assault, or harassment; misuse of funds;

1  
2  
3 181 sabotage; taking advantage of students or subordinates; specious whistleblowing or retaliation  
4 182 against valid whistleblowers; to name a few (e.g., Ghorayshi 2016; Gibbons 2014;  
5 183 <http://retractionwatch.com>). The exclusion of such malfeasance from “research misconduct” has  
6 184 been questioned. For example, a researcher who failed to meet her study objectives after being  
7 185 sabotaged by a rival argued that she was further penalized by being instructed not to divulge the  
8 186 reason for her study failures to her funders (Enserink 2014). In contrast, institutions often do go  
9 187 beyond the minimum “FFP” definition in their policies (Resnik et al. 2015), which has led to  
10 188 objections of conflation of egregious misconduct such as fraud with failure to comply with  
11 189 administrative requirements that did not compromise data validity (Couzin-Frankel 2017).

12  
13  
14  
15  
16  
17 190 The U.S. National Academy of Science (NAS 2017) recently argued that the definitions of  
18 191 research misconduct as fabrication, falsification, or plagiarism were too narrow. In particular,  
19 192 questionable research practices were more than just “questionable,” but were clear violations of  
20 193 the fundamental tenets of research and were given a less ambiguous label of “detrimental.”  
21 194 Consensus detrimental research practices were:

- 22  
23  
24 195 1. Detrimental authorship practices that may not be considered misconduct, such as  
25 196 honorary authorship, demanding authorship in return for access to previously collected  
26 197 data or materials or denying authorship to those who deserve to be designated as  
27 198 authors. [Here we think it is important to distinguish between pairing a data reuse with  
28 199 an invitation to collaborate and share authorship versus demanding authorship as a  
29 200 condition of data access (Duke and Porter 2013)].
- 30  
31  
32  
33 201 2. Not retaining or making data, code, or other information/materials underlying research  
34 202 results available as specified in institutional or sponsor policies, or standard practices  
35 203 in the field.
- 36  
37  
38 204 3. Neglectful or exploitative supervision in research.
- 39  
40 205 4. Misleading statistical analysis that falls short of falsification.
- 41  
42 206 5. Inadequate institutional policies, procedures, or capacity to foster research integrity  
43 207 and address research misconduct allegations, and deficient implementation of policies  
44 208 and procedures, and
- 45  
46  
47 209 6. Abusive or irresponsible publication practices by journal editors and peer reviewers  
48 210 (NAS 2017).

49  
50 211 The term “scientific integrity” is sometimes used synonymously with research integrity.  
51 212 However in recent usage, the term has included insulation of science from political interference,  
52 213 manipulation, or suppression of science (Doremus 2007; Douglas 2014). The term “scientific  
53 214 integrity” has been used in government science policy in the United States. There, scientific

1  
2  
3 215 integrity guidelines were developed in an overarching sense that includes research integrity at the  
4 216 individual and institutional level but were also intended to protect federal scientists from political  
5 217 interferences. Political officials were not to alter or suppress scientific findings, and transparency  
6 218 was encouraged in the preparation of the government-supported scientific research (Obama  
7 219 2009; Stein and Eilperin 2010). The scientific integrity guidelines in the US were followed by  
8 220 derivative policies intended to put substance to the transparency provisions, requiring open-  
9 221 access to federally funded research articles and more importantly, requiring archiving and public  
10 222 availability of the underlying raw data (Holdren 2013). These broad policies become more  
11 223 specific and procedural in government science agencies, and expanded to codes of scholarly and  
12 224 scientific conduct such as a list of 19 principles for the U.S. Department of Interior (U.S.  
13 225 Department of Interior 2014).

19 226 We expect the vast majority of scientists consider themselves to hold science integrity, as self-  
20 227 defined in terms of honesty, transparency, and objectivity, sticking to the research question and  
21 228 avoiding bias in data interpretation (e.g., Shaw and Satalkar 2018). Yet most scientists will  
22 229 encounter ethically ambiguous situations. For instance, some may feel that they struggle to  
23 230 advance science against a rising tide of administrative requirements accompanied by declining  
24 231 support for science and increasing competition for funding. When does cutting through  
25 232 bureaucratic institutional requirements cross the line from being commendable efficiency to  
26 233 violating research integrity rules? Using grant/project funds for unrelated purchases or  
27 234 conference travel? Should minor misbehaviors such as posting ones' article on a website after  
28 235 signing a publication and copyright transfer agreement with the publisher agreeing not to do so  
29 236 still be considered misbehaviors when done by many? When does cleaning data become cooking  
30 237 data when, for example, anomalous values are suppressed? There are many ethically ambiguous  
31 238 situations in which scientists may consider doing the "right thing" (compliance with all rules)  
32 239 might need to be balanced with doing the "good thing," especially when the welfare of others  
33 240 such as students or subordinates is involved (Johnson and Ecklund 2016).

41 241 To us, scientific integrity can be simplified to cultures of personal integrity plus a few  
42 242 profession-specific provisions of transparency and reproducibility. At their roots, these norms  
43 243 are those children are hopefully acculturated to in primary school. *Tell the truth, and tell the*  
44 244 *whole truth* (no data sanitizing, selective reporting, and report all conflicts), *tell both sides of the*  
45 245 *story* (avoid bias), *do your own work* (no plagiarism), *read the book, not just the back cover*  
46 246 *before writing your report* (properly research and cite primary sources), *show your work for full*  
47 247 *credit* (transparency), *practice makes perfect* (rigor), *share* (publish your work and data in peer-  
48 248 reviewed outlets for collective learning), and *listen* (with humility and collegial fraternity to  
49 249 observations and suggestions of others). Finally, the golden rule "*do unto others as you would*  
50 250 *have them do unto you*" should resonate throughout the professional interactions of  
51 251 environmental scientists, and especially in peer reviewing and data sharing. When encountering

1  
2  
3 252 an inevitable science dispute, keep criticisms objective, constructive, and focused on the work  
4 253 and not the worker; do peer reviews of your rivals' work as you would hope to receive reviews  
5 254 of your own, reward and recognize good behavior in science, and so on.  
6  
7

### 8 255 **The interested scientist: conflicts of interest, competing interests, and bias**

9  
10 256 Although we would like to believe that outright fraud or deliberate campaigns to manipulate  
11 257 science are rare in the environmental sciences, at some points in their careers almost every  
12 258 practicing scientist must grapple with questions of conflicting or competing interests and must  
13 259 guard against bias in approaches and interpretation. Conflicts of interest are often narrowly  
14 260 defined to situations where the scientists or their employers stand to gain financially from their  
15 261 work.  
16  
17  
18

19 262 The term “conflicts of interest” is commonly defined as financial conflicts. One definition is  
20 263 “a set of conditions in which professional judgment concerning a primary interest tends to be or  
21 264 could be perceived to be unduly influenced by a secondary interest (such as financial gain). More  
22 265 simply, a conflict of interest is any financial arrangement that compromises, has the capacity to  
23 266 compromise, or has the appearance of compromising trust (Krimsky 2003, 2007). The term  
24 267 “competing interests” is often used where non-financial factors compete with objectivity, such as  
25 268 allegiances, personal friendships or dislikes, career advancement, having taken public stances on  
26 269 an issue, political, academic, ideological, or religious affiliations (Nature Editors 2018; PLOS  
27 270 Medicine Editors 2008). Bias in study design or data interpretation may arise from either  
28 271 conflicts or competing interests and can be either overt or unrecognized by the scientist (Suter  
29 272 and Cormier 2015b)  
30  
31  
32  
33  
34

35 273 Generally, the concern over conflicting or competing interests in science is that secondary  
36 274 interests such as financial gain or maintaining professional relationships compromise the primary  
37 275 interest of upholding scientific norms such as reporting data accurately and completely,  
38 276 interpreting data appropriately, and acknowledging value judgments or interpretive assumptions  
39 277 (Elliott 2014). Conflict of interest policies may be better developed in the biomedical fields than  
40 278 in the applied environmental sciences because the former often involves human participants, and  
41 279 because of the strong financial ties between academia and the pharmaceutical industry (Tollefson  
42 280 2015). For instance, if a research team is reporting on the efficacy of a medical device or a  
43 281 pharmaceutical, and they or their employers hold a patent or stand to gain financially from a  
44 282 positive report, then they clearly have a financial conflict of interest (Figure 1).  
45  
46  
47  
48  
49

50 283

51 284

52  
53  
54 285 The mere existence of a potential conflict of interest should not alone throw results in doubt  
55 286 where it is disclosed and acknowledged appropriately. However, although most authors in the  
56  
57

1  
2  
3 287 environmental sciences routinely disclose funding sources that could be perceived as potential  
4 288 conflicts of interest, major omissions have occurred (Oreskes et al. 2015; Ruff 2015; Tollefson  
5 289 2015). For instance, the findings of a study on risks of contamination from natural gas extraction  
6 290 from hydraulic fracturing of bedrock were undermined when it came out (apparently  
7 291 unbeknownst to the university) that the research supervisor was being paid 3X his university  
8 292 salary by serving as an advisor to an oil and gas company invested in the practice. The failure to  
9 293 disclose this financial relationship in the publication brought the study's objectivity and  
10 294 credibility into question, independent of its substance (Stokstad 2012). Authors and journals have  
11 295 been criticized for gaming ethical financial disclosure requirements, such as by overly narrow  
12 296 disclosures or disclosing a conflict in the cover letter to the editor accompanying the manuscript  
13 297 (which doesn't get published or shared with reviewers) but not including it in the actual article  
14 298 (Marcus and Oransky 2016).

15  
16  
17  
18  
19  
20  
21 299 It should be noted that the severe conflicts of interest that some academic biomedical  
22 300 researchers have created for themselves by setting up business interests to directly and personally  
23 301 profit from their research outcomes (Krimsky 2003) are probably much less of an issue in the  
24 302 environmental sciences. Dual affiliations and the resultant potential for divided loyalties for  
25 303 university researchers have certainly come to light in the environmental sciences, such as if the  
26 304 scientist has a public facing, disinterested, researcher identity but privately has set up spin-off  
27 305 personal, business interests (Fellner 2018; Stokstad 2012). While we are not aware of any  
28 306 systematic review, we think these situations are far less pervasive in the environmental sciences  
29 307 than biomedicine. Rather, in ecotoxicology and environmental chemistry, the more common (and  
30 308 less insidious) concern for authors and institutions to be self-aware of the potential for funding  
31 309 bias through unconscious internalization of the interests of their research sponsors. The  
32 310 informative value of conflict of interest or funding disclosures vary. The shortest (and least  
33 311 informative) statement we have seen was that "*the usual disclaimers apply*" (Descamps 2008),  
34 312 while the detailed disclosures in biomedical literature can go on for pages (Baethge 2013; ICMJE  
35 313 2016). Funding sources can be obscured by channeling funding through intermediaries, such as a  
36 314 critical review of cancer risks from talcum powder funded by a law firm involved in toxic tort  
37 315 litigation (Muscat and Huncharek 2008). Requirements for highly detailed disclosures risk  
38 316 diminishing their importance to that of the "fine print" cautions in commerce that are seldom  
39 317 read. Much like computer software user terms and conditions that have to be clicked past or the  
40 318 ubiquitous consumer product safety stickers that may be written more to avoid product liability  
41 319 claims than for practical safety, detailed conflict of interest disclosures may reach a point of  
42 320 diminishing returns. Twenty years ago, Goodstein (1995) groused that he was tired of reading  
43 321 disclosure statements that were longer than the methods sections in papers, and they have been  
44 322 expanded upon since. Our view is that in ecotoxicology and the environmental sciences, simple,



1  
2  
3 323 unambiguous statements of the funding sources that directly or indirectly allowed the work to be  
4 324 completed should generally be sufficient.

5  
6 325 Non-financial competing factors may also compete with scientific objectivity. Factors or  
7 326 values such as these are usually termed “competing interests” reserving “conflicts of interest” for  
8 327 financial conflicts (Nature Editors 2018; PLOS Medicine Editors 2008). In our observations,  
9 328 competing interests are rarely if ever mentioned in environmental science publications. Rather,  
10 329 they are often discussed behind the scenes, such in correspondence between an editor and  
11 330 potential reviewers, along the lines of “*yes I would be happy to review this article and believe I*  
12 331 *can be objective, however, you should know that I used to be a labmate of the PI and we*  
13 332 *collaborated on an article 3 years ago.*” Whether or how competing interests or values affect the  
14 333 assumptions and perspectives of scientists’ should be more formally stated is an area of rich  
15 334 debate in the philosophy of science literature (Douglas 2015; Elliott 2016; PLOS Medicine  
16 335 Editors 2008).

17  
18 336 We reiterate our belief that the existence of a potential conflicts or competing interests is a  
19 337 ubiquitous part of the environmental science landscape and do not indicate poor science. Most  
20 338 scientists strive to present unbiased data and interpret their data evenhandedly. However, the  
21 339 varied experiences of scientists can influence their perspectives in ways that they may not  
22 340 recognize themselves. The transparency in disclosure reminds the reader to consider perspectives  
23 341 and alternate interpretations when judging the merits of a study, synthesis paper, or risk  
24 342 assessment.

### 25 343 *Bias*

26 344 Many of the published concerns in the environmental science literature come down to  
27 345 cognitive bias (Figure 2). Science is not value free, and personal bias in interpreting science is  
28 346 often related to differing worldviews (Douglas 2015; Elliott 2016; Lackey 2001; Nuzzo 2015).  
29 347 For instance, the collapse of major fisheries that ostensibly had been scientifically managed for  
30 348 sustainable yields helped inspire the Precautionary Principle. This philosophy sought more  
31 349 cautious management and the reversal of the burden of proof for sustainable exploitation of  
32 350 natural resources (Peterman and M'Gonigle 1992). Those with precautionary principle or risk  
33 351 assessment worldviews may interpret the same set of facts very differently. The precautionary  
34 352 principle adherent may emphasize absence of conclusive evidence of safety, and the risk  
35 353 assessment adherent may emphasize absence of conclusive evidence of harm (Fairbrother and  
36 354 Bennett 1999). In such settings, values and biases are interwoven. Even self-disciplined  
37 355 scientists who seek openness and objectivity carry some biases from experiences and  
38 356 acculturation (here meaning how working in different environmental organisations can lead  
39 357 scientists to modify their perception and thinking). Recognizing sources of bias does not imply

1  
2  
3 358 ill intent, for just the process of acculturation to a particular place of employment can bias  
4 359 perceptions and inclinations (Brain et al. 2016; Suter and Cormier 2015a, b).

6 360 Professional societies such as SETAC can serve as a form of acculturation; some of the  
7 361 authors of this essay have been active members of SETAC for much longer than they have been  
8 362 employed by any single employer. Even self-disciplined scientists who seek openness and  
9 363 objectivity carry biases from their experiences. What becomes particularly difficult to self-  
10 364 regulate is the convergence of cognitive bias, a human nature to seek to please one's patron, and  
11 365 the interests of one's employer or client. For instance, studies funded by drug or medical device  
12 366 makers tend to find positive effects that favor the company funding the research (Lexchin et al.  
13 367 2003; Smith 2006), and the funding effect for studies of chemical toxicity may lean toward  
14 368 finding negative effects (Bero et al. 2016; Krinsky 2003, 2013). However, concordance between  
15 369 a funder's self-interest and research findings does not alone indicate bias. Alternatively the  
16 370 industry-funded researchers could have deeper knowledge of a drug or chemical than non-profit  
17 371 funded academic researcher who might have less extensive experience, the industry-funded work  
18 372 was more thoroughly vetted based on internal research, or the industry-funded scientists might  
19 373 have better ability to obtain the resources and skill to carry out well focused and rigorous  
20 374 research (Krinsky 2013; Macleod 2014). It is doubtful that these influences can be completely  
21 375 separated. To us, disclosure, transparency and balanced external reviews are presently the best  
22 376 pragmatic approach to managing cognitive biases.

23 377 Tit for tat, adversarial claims of bias in the scientific literature doubtfully advance the science.  
24 378 Conflicting perspectives can become personalized and intractable. How to know which is more  
25 379 credible? Neither? Both? Food nutrition researchers pointed out examples of selective data  
26 380 interpretations and publication bias in obesity research in relation to sweetened beverage (soft  
27 381 drink) consumption and in the health benefits of breast feeding. They termed this distortion of  
28 382 information to further what may be perceived to be righteous ends as "white hat bias" (Cope and  
29 383 Allison 2009). However, the conflicted financial backing from the soft drink industry and from  
30 384 manufacturers of baby formula contributed to counter-criticisms of funding bias (Bes-Rastrollo  
31 385 et al. 2014; Harris and Patrick 2011; Mandrioli et al. 2016). Unresolved in the claims and  
32 386 counter-claims of bias and financial conflicts of interest was what advice was most credible.

33 387 In environmental toxicology as well, controversies over the best interpretation of sometimes  
34 388 ambiguous facts can become entrenched and focused on the people holding differing views as  
35 389 much as the evidence behind the different views. Examples include deeply held and personalized  
36 390 disagreements over risks of atrazine to amphibians (Hanson et al. 2018; Hayes 2004; Raloff  
37 391 2010; Rohr and McCoy 2010; Solomon et al. 2008); sufficiently safe levels of selenium for fish  
38 392 and birds (Renner 2005; Skorupa et al. 2004); and a dispute that was maintained for over 20  
39 393 years about whether an oil spill resulted in indirect harm to salmon (Burton and Ward 2012).

1  
2  
3 394 These intractable, mutual bias criticisms make it very difficult for non-specialist readers to make  
4 informed judgements of which is the more credible science.  
5 395

6 396 Suter and Cormier (2015a) noted that conflicting assessments on the same question that have  
7 been produced by government agencies, industries, and environmental advocacy groups suggest  
8 397 that biases occur during assessment processes. Sources of bias include personal bias, regulatory  
9 398 capture, advocacy, reliance on volunteer experts, biased stakeholder and peer review processes,  
10 literature searches, excluding new science through dependence on standard methods,  
11 399 inappropriate standards of proof, misinterpretation, and ambiguity. Suter and Cormier (2015a)  
12 400 argue for assessors to adopt practices that would increase objectivity, transparency, and clarity of  
13 assessments and syntheses.  
14 401  
15 402  
16 403  
17  
18

19 404 *Some particularly challenging situations in ecotoxicology*

20 405 Some situations that seem particularly challenging for researcher and institutions to maintain  
21 scientific credibility warrant mention. Elliott (2014) argued that scientific findings that are  
22 406 ambiguous or require a good deal of interpretation or are difficult to establish in an obvious and  
23 407 straightforward manner are prone to bias, particularly if strong incentives to influence research  
24 findings in ways that damage the credibility of research are present. In environmental toxicology,  
25 408 risk assessments or critical reviews fit that test and can be vulnerable to bias, particularly when  
26 409 funded by sponsors with financial interests in the findings (Suter and Cormier 2015a). This can  
27 be heightened by how variability and large uncertainties are handled in environmental toxicology  
28 410 and associated risk assessments and syntheses – for example extrapolation of results from one or  
29 411 more species to protection of wide swaths of our world’s biodiversity; or the difficulty in  
30 reproducing field studies; or the variability of chemical exposures across diverse and expansive  
31 412 landscapes and waters. These challenges may lead to differences of opinion on methods for  
32 413 drawing conclusions to support decision-making that, while prone to bias, have, at their root, the  
33 need for drawing conclusions in the face of uncertainty.  
34 414  
35 415  
36 416  
37 417  
38 418  
39  
40

41 419 Costs of large-scale projects to remediate contaminated environments such as sediments  
42 420 contaminated by urban and industrial sources, aged industrial facilities, or large mining  
43 421 operations can be enormous, running to the hundreds of millions of dollars or more (Gustavson  
44 422 et al. 2007; McKinley 2016). In “polluter-pays” schemes, the potential financial liability  
45 423 associated with such projects could imperil the ongoing viability of companies, which in turn  
46 424 would harm the livelihoods of employees, among other social disruptions. In such a setting, the  
47 425 scientists working on behalf of the those who may have to incur the costs of cleanup might  
48 426 understandably be more cautious about the potential for misguided remediation following Type I  
49 427 error (e.g., falsely discovering environmental degradation) than Type II error (failing to discover  
50 428 degradation when in fact it is occurring), when the science is ambiguous. Conversely, the  
51 429 regulatory scientists entrusted to provide scientific advice to protect environmental quality might  
52  
53  
54  
55  
56  
57  
58  
59  
60

1  
2  
3 430 be obliged to err on the side of precaution and be more accepting of risk of Type I error,  
4 431 especially when it is “other peoples” money at stake.

6 432 While science ethicists and the NAS (Boden and Ozonoff 2008; Elliott 2014; Krimsky 2005;  
7 433 NAS 1992) have emphasized industry funding bias risks, these risks are not unique to industry  
8 434 funding of science. For examples, many countries have provisions for natural resource damage  
9 435 assessment and restoration (NRDAR) to compensate the public for lost opportunities following  
10 436 shipwrecks, oil spills, releases of industrial chemicals, and so on (Boehm and Ginn 2013;  
11 437 Descamps 2008; Flamini et al. 2004; Goldsmith et al. 2014). These assessments rely on science  
12 438 to some degree to establish linkages from the release to harm to the environment. In turn, trustees  
13 439 of natural resources rely on science advisors to assess the extent and scale of injuries (adverse  
14 440 effects) and the monies needed to restore the lost services. In large incidents, the responsible  
15 441 parties will inevitably retain their own science advisors. The resolution of complex situations is  
16 442 resolved either by negotiation or adversarial litigation (Flamini et al. 2004; Goldsmith et al.  
17 443 2014). This environment produces an atmosphere with strong incentives for plaintiff/trustee  
18 444 science advisors to maximize the magnitude and spatial extent of effects to the environment and  
19 445 to downplay uncertainties or the influence of potential other, non-compensable stressors and vice  
20 446 versa for those scientists retained to help defend against claims. Maintaining objectivity and  
21 447 advancing science in such a work environment would require extraordinary self-discipline by the  
22 448 individual scientists, an institutional environment emphasizing science credibility, and an  
23 449 openness to external, disinterested review (Boden and Ozonoff 2008; Elliott 2014; Wagner  
24 450 2005).

25 451 While at least in some jurisdictions, monies from NRDARs must go to restoring the damaged  
26 452 public natural resources (beyond paying for salaries or consulting fees) and cannot be used to  
27 453 enrich those pursuing the cases. Toxic torts by comparison, pursue damages on behalf of private  
28 454 individuals or groups who consider themselves to have been harmed by exposures to toxic  
29 455 chemicals. Toxic tort cases are adversarial proceedings with the lawyers expected to advocate  
30 456 only for their client, and expert witnesses are paid to present testimony to support just one side.  
31 457 These torts may be highly lucrative for the plaintiff attorneys who select the science testimony.  
32 458 For example, in the Vioxx litigation the share for plaintiff lawyers was about \$1.5 billion (32%)  
33 459 of the \$4.85 billion settlement (McClellan 2008), and in successful asbestos litigation the  
34 460 average share of payouts going to the victims was only 37% (Elliott 1988). The lures and risks of  
35 461 such immense payouts in toxic torts create strong incentives for biased science. At best, critical  
36 462 reviews or product defense studies conducted for toxic tort science should be regarded with  
37 463 skepticism.

38 464 Defense of science and engineering in favor of protecting enterprises reflecting years of  
39 465 devoted work is understandable but becomes dangerous when objectivity is compromised. Case

1  
2  
3 466 studies such as the Vioxx case, in which the maker of the drug downplayed increased risks of  
4 467 mortality from a successful product in which they were deeply vested (Curfman et al. 2005;  
5 468 McClellan 2008) and the cross-claims of blame between the engineering consultants and the  
6 469 mine operator in the aftermath of the Mount Polley mine tailing dam failure (Topf 2016), remind  
7 470 us that objective science (including recognizing and disclosing uncertainty, and encouraging  
8 471 additional science to narrow that uncertainty) is good business.

### 12 472 *Academic – Industry Collaborations*

13 473 The role of industry funding and concerns of perceived conflicts of interest in academic-  
14 474 industry collaborations have been addressed in literature and are a common element in  
15 475 institutional research integrity policies (Elliott 2014; Resnik and Shamoo 2011). Often through  
16 476 philanthropic foundations, industry may contribute to basic science education and research to  
17 477 strengthen regional universities and further the science literacy of potential workforce and  
18 478 society. Industry may also support applied ecotoxicology and other environmental science  
19 479 research to inform specific scientific questions that affect their business interests. When industry  
20 480 and academic research interests become at least partially congruent, academic scientists may  
21 481 actively seek out such interest and support for their projects and graduate students.  
22 482 Pragmatically, academic-industry collaborations are necessary since public funding alone may be  
23 483 insufficient to support graduate research or to address important questions relevant to industry  
24 484 and society. In the US, about 40% of national research and development is funded by the private  
25 485 sector (NAS 2017). In the US, public funding for university research on the effects of chemicals  
26 486 in the environment has consistently declined since 2000 (Bernhardt et al. 2017; Burton et al.  
27 487 2017), which implies that without industry-academic collaborations, there would be much less  
28 488 substantive university research. As a university president quipped, “*the only problem with tainted*  
29 489 *research funding is there t’aint enough of it*” (Krimsky 2003).

30 490 Benefits of collaboration run both ways, with expertise from academic and public sectors  
31 491 helping industry find solutions to lessen or avoid contributing to environmental problems  
32 492 (Hopkin 2006). Edwards (2016) lays out several principles for successful, durable industry-  
33 493 academic collaborations, including: establish clear quality criteria and make them public;  
34 494 mandate data sharing; subject work to independent oversight before public release; and enshrine  
35 495 public ownership for all research outputs. Further, effective collaboration between industry and  
36 496 academic scientists requires industry to provide expertise as well as funds. Collaboration with  
37 497 industry scientists engenders a shared desire to succeed and creates a sense of ownership of a  
38 498 project (Edwards 2016). The interchange of science through academic, industry, and government  
39 499 scientists is deeply rooted in SETAC culture, and the favorable views of the authors toward  
40 500 working across sectors is undoubtedly influenced through our history with SETAC. However,  
41 501 industry support to academics or others in support of applied environmental questions may come

1  
2  
3 502 with inherent conflicts of interest, and critics may consider scientists as collaborators in the  
4 503 pejorative sense of the word (Hopkin 2006). This setting requires vigilance from both industrial  
5 504 research sponsors and recipients to avoid unconscious bias.  
6  
7

8 505 While readers might presume situations in which individuals or institutions with strong  
9 506 incentives to influence research findings consistent with their financial interests will do so, it is  
10 507 important not to judge a study solely by its funder, nor to presume the sponsor's preferred  
11 508 outcome. For example, an energy company sponsored a study to see if they could develop a  
12 509 scientific case for relief from costly requirements for meeting dissolved oxygen criteria in a river  
13 510 downstream of its hydroelectric dam. Instead they developed evidence that the existing criteria  
14 511 could impair hatching salmon (Geist et al. 2006). The company scientists easily could have  
15 512 buried the results, which could have been discounted as being from novel techniques. Their path  
16 513 of least resistance would have been to leave the study in the file drawer, rather than going to the  
17 514 trouble of defending novel science and publishing it in the open literature. In the long-view, a  
18 515 reputation of science credibility may be more valuable for companies than short-term project  
19 516 benefits.  
20  
21  
22  
23  
24

25 517 Other examples include scientists from mining and metals trade groups publishing studies  
26 518 showing that existing USEPA criteria for zinc and other metals could be under-protective of  
27 519 aquatic species or entire communities (Brix et al. 2011; DeForest and Van Genderen 2012).  
28 520 Conversely, a university quantitative ecologist accepted support from an environmental  
29 521 advocacy group (through university channels) to model the potential population-level effects of  
30 522 elevated selenium from mining on local native trout populations (Van Kirk and Hill 2007). As  
31 523 the advocacy group had been a persistent opponent of the mining operations, officials from the  
32 524 influential mining company apparently presumed that the academics' work would also be biased  
33 525 to favor the advocacy group's positions, and they questioned the researchers' probity  
34 526 (Blumenstyk 2007). In fact, the selenium concentrations projected by these academics to cause  
35 527 detrimental population-level effects were higher than concentrations previously derived by  
36 528 industry-funded consultants who themselves had been on the receiving end of bias implications  
37 529 because they were aligned with corporate interests (Skorupa et al. 2004; Van Kirk and Hill  
38 530 2007). Unfortunately, these examples are countered by unfavorable examples in which studies  
39 531 were funded as part of deliberate strategies to shape the science to fit business interests. This  
40 532 "tobacco strategy" has been asserted in regard to various substances such as asbestos, benzene,  
41 533 chromium, lead, vinyl chloride, and more (Anderson 2017; Cranor 2008; Krimsky 2003;  
42 534 Michaels 2008; Oreskes and Conway 2011; Sass et al. 2005). As these examples show, judging  
43 535 science and scientists solely by their funding or affiliation is unfair and may lead to  
44 536 misjudgments.  
45  
46  
47  
48  
49  
50  
51  
52  
53  
54  
55  
56  
57  
58  
59  
60

1  
2  
3 537 In keeping with the adage to be careful judging a book by its cover or wine by its label,  
4 538 judging science by its funder or by presumed interests or leanings of the scientists can lead to  
5 539 mistaken and unfair perceptions. Brain et al. (2016) pointed out that the career path of  
6 540 environmental scientists is often ambiguous and whether scientists ended up in careers with  
7 541 industry, academic, or government science has more to do with chance and timing of  
8 542 opportunities rather than a particular desire to work in one sector or another. Such is often the  
9 543 case with academic and government scientists who work with industry to jointly fund or  
10 544 investigate a science question of mutual interest (Hopkin 2006). The convergence of scientific  
11 545 interests with financial interests can lead to a good marriage, so long as the parties are principled  
12 546 and forthright with each other. While there may be a perception that research contracts are highly  
13 547 restrictive, in our experiences these agreements establish expectations of academic freedoms.  
14 548 “Interested science” should be viewed with open-minded skepticism, and studies with immense  
15 549 financial implications warrant a higher level of scrutiny than others (Krumholz et al. 2007; Suter  
16 550 and Cormier 2015b; van Kolschooten 2002). It does not necessarily follow that interested  
17 551 science is wrong or tainted. Ensuring transparency and complete data reporting is one tangible  
18 552 step researchers can take to improve credibility of and perceptions toward industry-academic  
19 553 collaborations.  
20  
21  
22  
23  
24  
25  
26  
27  
28  
29  
30  
31

32 556 *A scientific society founded on the principles of balancing competing interests*

33  
34 557 Scientific societies have important roles in promoting scientific integrity and ethical conduct,  
35 558 such as establishing codes of ethics which include disclosure of conflicts of interest, being a  
36 559 focal point for developing and communicating discipline-specific standards to foster research  
37 560 integrity, and providing educational material (AAAS 2000; NAS 2017).  
38  
39

40 561 We think the Society of Environmental Toxicology and Chemistry (SETAC) is notable for its  
41 562 directed and sustained efforts to balance competing perspectives in its deliberative processes and  
42 563 other activities. The founding principles and structure of SETAC sets out a tripartisan structure  
43 564 with regulatory, industrial, and academic scientists (Bui et al. 2004; Menzie and Smith 2018). As  
44 565 a result, SETAC now has well developed norms for balancing interests, inclusiveness of  
45 566 differing viewpoints, and neutrality in the reporting. These norms have enabled SETAC to be  
46 567 regarded as a source of consensus-based science with successful partnership or advisory roles in  
47 568 United Nations programs and conventions such as the United Nations Environment Programme’s  
48 569 (UNEP) Global Mercury Partnership, Stockholm Convention on persistent organic pollutants,  
49 570 UNEP-SETAC Life Cycle Initiative for reducing hazardous waste as well as informing national-  
50 571 level legislation (Augspurger 2014; Mozur 2012). The intended balanced representation of  
51  
52  
53  
54  
55  
56  
57  
58  
59  
60

1  
2  
3 572 industry, government, and academia isn't always achievable, for there are also guidelines for  
4 573 gender equity, geographic representation, and of course people have to be willing to volunteer.  
5  
6 574 Further, the tripartisan emphasis underrepresents scientists from environmental advocacy groups.  
7  
8 575 These groups are influential for shaping public debate, policy and law on environmental issues,  
9  
10 576 but their low participation in the Society suggests that they may not be attracted to or feel  
11 577 welcomed by a "hard" scientific society such as SETAC, and meeting costs may be a barrier.  
12 578 Despite these imperfections, the norms of seeking to balance potentially conflicting interests and  
13 579 to provide a safe forum to express differing scientific viewpoints are deeply ingrained in the  
14  
15 580 Society's culture and activities.

### 17 581 **Promoting scientific integrity in ecotoxicology**

18  
19 582 While "scientific integrity" is ultimately a subjective judgment that cannot easily be reduced  
20 583 to review checklists, there are some general points to maintain in ecotoxicology and related  
21 584 science. These include relevance, rigor, reproducibility, objectivity, and transparency.

#### 24 585 *Relevance*

25  
26 586 By definition, environmental chemistry and ecotoxicology are concerned with how chemicals,  
27 587 both natural and synthetic, pose a threat or influence the natural world (Johnson et al. 2017).  
28  
29 588 Because of pragmatic and ethical constraints, research in this domain is often done in laboratory  
30 589 environments, testing cultured laboratory organisms or cell lines or other in vitro surrogates for  
31 590 organisms. However, the intent of such research invariably still has some intended relevance to  
32 591 conditions that occur in the environment. We have seen articles in ecotoxicology literature  
33 592 discussing some novel research based on under-tested taxa, underappreciated endpoints,  
34 593 unexpected multiple stressor effects, or unanticipated indirect effects via untested commensal  
35 594 microbes. An article may start out with an introduction on the ecological importance of the  
36 595 novel work, the work is reported, and then the discussion closes arguing that ecological  
37 596 importance of their work, how it should change the thinking in the field, and management  
38 597 implications. Yet to obtain their desired experimental effects, exposure concentrations may have  
39 598 been orders of magnitude higher than those typical in the real world, or exposure routes,  
40 599 chemical forms, or dilution media may be unlike those that the organisms could encounter in  
41 600 nature (Johnson and Sumpter 2016; Mebane and Meyer 2016; Weltje and Sumpter 2017). When  
42 601 authors present such studies with a narrative on the ecological importance of their topic, this may  
43 602 be a form of misrepresentation.

#### 51 603 *Rigor*

52  
53 604 Funders, journals, and institutions reward novelty, such as the short-lived discovery of a  
54 605 bacterium that grows with arsenic instead of phosphorus (Alberts 2012). Highly selective  
55 606 journals with article acceptance rates of 10% or less preferentially publish findings that are



1  
2  
3 607 sensational or at least surprising. These incentives are influential because universities and  
4 608 research institutes often hire and promote scientists based on their record of acquiring grant  
5 609 money and the number of publications times the journal impact factors of the journals published  
6 610 therein (Parker et al. 2016). With finite career opportunities and high network connectivity, the  
7 611 marginal return for being in the top tier of publications may be orders of magnitude higher than  
8 612 an otherwise respectable publication record (Smaldino and McElreath 2016). The editorial quest  
9 613 for novelty has led to publication of questionable articles in elite journals, such as one positing  
10 614 that caterpillars were the results of accidental sex between insects and worms (Borrell 2009).  
11 615 Top tier journals also tend to have higher retraction rates than mid-tier journals, suggesting that  
12 616 rigor has sometimes been compromised in the competition for paradigm shifting results (Nature  
13 617 Editors 2014).

14  
15  
16  
17  
18  
19 618 In ecotoxicology, Harris et al (2014) describe 12 basic principles of sound ecotoxicology that  
20 619 should apply to most environmental toxicity studies. These principles range from carefully  
21 620 considering essential aspects of experimental design through to accurately defining the exposure,  
22 621 adequate replication, unbiased analysis and reporting of the results, and repeating experiments  
23 622 that yielded surprising or ambiguous responses. There are ample opportunities for improvement.  
24 623 For example, Harris and Sumpter (2015) asked a very basic question of a sample of studies  
25 624 published in 2013 in three leading ecotoxicological publications: was the concentration of the  
26 625 test chemical actually measured? Of the studies reviewed from *Environmental Toxicology and*  
27 626 *Chemistry*, 20% failed this basic aspect of experimental credibility, as did 33% and 41% of  
28 627 ecotoxicology studies published in *Aquatic Toxicology*, and *Environmental Science and*  
29 628 *Technology*, respectively (Harris and Sumpter 2015).

30  
31  
32  
33  
34  
35  
36 629 While Harris et al. (2014) emphasized laboratory-based studies, field-based environmental  
37 630 effects studies replace the challenges of the artificiality and questionable relevance of some  
38 631 laboratory-based toxicity testing, with different, messy, real world challenges. Closely related to  
39 632 the 12 principles described by Harris et al, we suggest 8 basic principles relevant to most field-  
40 633 based ecotoxicological studies or environmental effects monitoring.

- 41  
42  
43 634
- 44 635 1. Development of a thorough understanding of the issues to ask informed questions.  
45 636 The available literature should be thoroughly vetted to inform the need for  
46 637 experimentation;
  - 47 638 2. A thorough understanding of the questions being posed is an essential prerequisite for  
48 639 designing a robust, reliable, reproducible experiment. Incomplete understanding of  
49 640 the questions leads to vague and often misguided experimentation that undermines  
50 641 the scientific process (Lindenmayer and Likens 2010; Suter et al. 2002);
  - 51 642 3. The ability to identify and reliably measure sensitive indicators (Melvin et al. 2009),
  - 52 643 4. Careful attention to appropriate reference conditions to avoid potential, actual effects  
53 644 being masked by variability or confounding factors introduced by differences  
54 645 between the reference and test site environments (Arciszewski and Munkittrick 2015);
- 55  
56  
57  
58  
59  
60

- 1  
2  
3 645 Mebane et al. 2015). For example, beaches on rocky headlands and protected bays  
4 646 will have very different benthic invertebrate communities, as do flowing rivers and  
5 647 impounded reservoirs. Study designs that attempt to detect pollution effects on  
6 648 communities across such disparate habitats may have very low discriminatory power  
7 649 and by failing to account for natural variability, adverse pollutant effects could be  
8 650 obscured (Buys et al. 2015; Parker and Wiens 2005; Wiens and Parker 1995);
- 9 651 5. Try to study a number of locations that vary in the degree of the factor under  
10 652 investigation, such as chemical pollution, in order to (hopefully) demonstrate a  
11 653 positive relationship between exposure to the environmental factor of interest and the  
12 654 effect of that factor.
  - 13 655 6. Time and patience: Just as experimental exposures need to be of appropriate duration  
14 656 for effects of interest to be manifested, environmental monitoring needs to be  
15 657 maintained long enough to pick up true trends if present, or to convincingly argue that  
16 658 trends are not present (Lindenmayer and Likens 2010).
  - 17 659 7. Specific definitions of what effects are considered negligible or of concern (Melvin et  
18 660 al. 2009; Munkittrick et al. 2009; Power et al. 1995).
  - 19 661 8. Avoid power failures: use a statistical approach appropriate to the question,  
20 662 considering statistical burden of proof issues. For instance,  $P > 0.05$  in testing for  
21 663 trends or differences between locations does not by itself show the lack of trend or  
22 664 effects (Dixon and Pechmann 2005; Mudge et al. 2012).
  - 23 665 9. Transparent reporting with detailed methods and raw data sufficient for others to  
24 666 reproduce the analyses or to further examine the data using alternative analyses (Duke  
25 667 and Porter 2013; McNutt et al. 2016; Schäfer et al. 2013).

### 30 668 *Reproducibility*

31 669 Reproducibility is one indicator of reliable research. However, the inability of researchers to  
32 670 reproduce influential studies of others or their own has garnered enough attention to be called a  
33 671 “reproducibility crisis” (Baker 2016a; Henderson and Thomson 2017). However, not all studies  
34 672 are easily reproduced. Environmental data are often messy and field studies are more often  
35 673 observational than experimental. Large scale, ecologically realistic studies such as long-term,  
36 674 experimental lake studies difficult to do even once; and no one wishes to replicate mishaps such  
37 675 as tailings dam failures or oil spills (Parker and Wiens 2005; Schindler 1998; Wiens and Parker  
38 676 1995). Such studies require a logical system for causal inference to separate cause-and-effect  
39 677 from serendipitous correlations (Norton et al. 2002; Suter et al. 2002). Even rigorous laboratory  
40 678 studies may be difficult to replicate due to the highly variable nature of biological systems and  
41 679 unanticipated responses to unknown factors. Demands for reproducibility may favor industrial  
42 680 science over academic science. Industry often works within strict Good Laboratory Practice  
43 681 (GLP) rules and with well-studied species tested through standardized protocols (Elliott 2016).  
44 682 Academic science is often framed around education, and grants and graduate student researchers  
45 683 are usually encouraged to go after something new and novel; protocols may be developed as they  
46 684 go, and quality control may be uneven (Baker 2016b; Figure 3). Obstacles to adopting  
47 685 formalized quality management systems such as GLP in small research settings may include

1  
2  
3 686 costs, lack of resources, lack of mandate, independent cultures, and high turnover. Nevertheless,  
4 687 even if regulatory GLP compliance is not required, small academic research facilities can benefit  
5 688 from embracing core components of GLPs, such as defining responsibilities, maintenance and  
6 689 sanitation of common lab spaces, equipment and materials, well defined experimental protocols,  
7 690 quality control testing, data reviews, audits, and archiving (Bornstein-Forst 2017; Moermond et  
8 691 al. 2016).

12 692 Better experimental protocols that are easier to follow is one tangible way to strive for better  
13 693 reproducibility and transferability of both novel and standard experimental methods. Multimedia  
14 694 experimental protocols could be much easier to explain and teach techniques than the  
15 695 conventional, densely worded, printed protocols (Figure 4). The Journal of Visualized  
16 696 Experiments (JoVE) is an innovative peer reviewed, science methods journal in which its articles  
17 697 are a unique blend of the conventional printed article with professionally produced videography.  
18 698 Ecotoxicology methods articles have begun to be published in this format (Calfee et al. 2016;  
19 699 van Iersel et al. 2014). The field would benefit from broader use of new visualization techniques  
20 700 to document new methods and to improve education and training on techniques that need to be  
21 701 highly standardized to be repeatable. At the minimum, with the availability of electronic data  
22 702 repositories and supplemental information in journals, there is no reason why detailed methods  
23 703 including video demonstrations cannot be published.

30 704 Reproducing a statistical summary or model run reported in a scientific publication when the  
31 705 underlying data and code are provided and explained is one thing. Reproducing an actual  
32 706 complex experiment is hard and is rarely attempted, unless perhaps the results are novel and have  
33 707 a high regulatory or societal impact. Even under the best of circumstances, such as when the  
34 708 original researchers have the resources to and are diligent enough to repeat an experiment in the  
35 709 same lab with as close to identical methods as they could manage, it can be difficult or  
36 710 impossible to produce the same result twice (Owen et al. 2010). Nosek and Errington (2017)  
37 711 caution that if investigator #2 reports that the results of study #1 could not be reproduced, that  
38 712 does not indicate which is more credible: result #1, #2, neither, or both. Further, much of the  
39 713 “reproducibility” debate in the natural sciences is focused on cell biology or human behavior  
40 714 (psychology) experiments, which may be more tractable to reproducibility studies than messy  
41 715 environmental observational or experimental studies. Especially with complex biological testing  
42 716 such as multi-generation tests, a green thumb husbandry factor may bring together art and  
43 717 science to environmental chemistry and toxicology. Subtle methods differences, strain  
44 718 differences or stochastic events can be so puzzling that investigators are left thinking demons  
45 719 must have snuck into their study and interfered with one treatment but not others (Hurlbert  
46 720 1984). (We presume that Hurlbert’s (1984) suggestions for exorcisms or human sacrifice for  
47 721 troubleshooting suspected demonic intrusions, might run afoul of some contemporary  
48 722 institutional review board policies.)

1  
2  
3 723 Still, reproducibility is a core tenet of science and successful reproduction adds confidence in  
4 724 the credibility of novel findings. Divergent but individually credible results may further advance  
5 725 the science by illuminating important aspects missed in the initial study (Owen et al. 2010). If for  
6 726 instance, an investigator were to find a novel, major adverse effect of a class of chemicals to a  
7 727 previously untested taxonomic group, then other equally diligent investigators should be able  
8 728 produce similar effects in other research settings, even if the test conditions were only similar. A  
9 729 standalone paper from the 1970s that a snail was anomalously sensitive to Pb was skeptically  
10 730 regarded. Over 30 years later, this open-minded skepticism led to follow-on studies from a new  
11 731 generation of scientists that not only affirmed the anomalous early report of sensitivity but also  
12 732 led to important advances in comparative physiology and underlying mechanisms of toxicity  
13 733 (Brix et al. 2012). Similarly, early reports that freshwater mussels and other mollusks were  
14 734 unusually sensitive to ammonia were not widely persuasive. After repeated studies across  
15 735 multiple laboratories and species showed similar findings, the issue gained traction with  
16 736 standardized method development, inter-laboratory round robin testing, and attention by  
17 737 environmental managers (Farris and Hassel 2006; USEPA 2013).

18 738 Individual investigators may not always have the opportunities for self-replication, but best  
19 739 practices call for repeating what one can (Harris and Sumpter 2015). In field studies, multiple  
20 740 measures of exposure, multiple years of field data, and so on give credence to findings. We  
21 741 recognize that all science has practical resource limits and we are not going as far as arguing that  
22 742 novel findings from small sample studies should never be published. Rather, the appropriate  
23 743 conclusion from such studies is along the lines of “if these findings turn out to be repeatable,  
24 744 they could be an important development.” In our view, novel, major findings that are supported  
25 745 only by a one-off study are best regarded as tentative.

### 26 746 *Transparency*

27 747 Transparency in reporting research, including all the relevant underlying data that were relied  
28 748 upon in the paper, has become a critical element of integrity in science. Science’s claim to self-  
29 749 correction and overall reliability is based on the ability of researchers to replicate the results of  
30 750 published studies (Nosek and 39 co-authors 2015). Studies cannot be replicated or even  
31 751 reconstructed if scientists will not share additional data, information, or materials from published  
32 752 studies, and we believe that upholding such ethical norms is every scientist's responsibility. The  
33 753 embrace of the principle of transparent reporting has been uneven across disciplines, and the  
34 754 field of ecotoxicology has certainly not distinguished itself as a leader in this regard (McNutt et  
35 755 al. 2016; Meyer and Francisco 2013; Parker et al. 2016; Schäfer et al. 2013; Womack 2015).

36 756 Researchers in ecotoxicology and environmental chemistry have long only presented highly  
37 757 reduced data summaries. The only “data” included in some publications are crowded figures and  
38 758 tables with results of statistical outputs, such as F- values, effects concentration point estimates

1  
2  
3 759 (EC50, EC10, etc.), or no-and lowest-observed effects concentrations (NOECs, LOECs). These  
4 760 derived values are not data. Such data-poor publications essentially represent an implicit claim  
5 761 by the researcher to *“trust us, we know what we’re doing, our interpretation of the data is the*  
6 762 *only appropriate interpretation, you don’t need to see what you don’t see, and besides it’s our*  
7 763 *data to share as we see fit.”* Such attitudes reflect the norm in scientific publishing prior to the  
8 764 early 2000s, in which strict page limits and word limits precluded authors “wasting” space  
9 765 publishing data tables. With the provisions for electronic supplemental material beginning in the  
10 766 2000s, and dedicated data repositories becoming widely available at low or no costs to authors in  
11 767 the 2010s, these reasons for opaque publication are no longer justified. Researchers who choose  
12 768 not to transparently report the actual data underlying their scientific findings may have other  
13 769 reasons for doing so. They may be concerned about others scooping them on their own data  
14 770 (McNutt 2016), although counterintuitively, publishing data may actually help establish priority  
15 771 and reduce scooping concerns (Laine 2017). Other less charitable reasons why researchers might  
16 772 resist publishing data include that they haven’t devoted the needed time to organize their data in  
17 773 a coherent fashion that is interpretable by others, because reported results might not be able to be  
18 774 reconstructed from the underlying data, they are not keen to facilitate alternate statistical  
19 775 analyses or interpretations of their data, that they wish to publish unfalsifiable findings, or  
20 776 because there’s simply less there than they led readers to believe (Smith and Roberts 2016).

21 777 Data sharing may still be regarded more as an imposition from science funders to be complied  
22 778 with rather than as a universal principle embraced by those conducting and publishing scientific  
23 779 research (Burwell et al. 2013; Collins and Verdier 2017; European Commission 2016; Holdren  
24 780 2013; Nelson 2009; Nosek and 39 co-authors 2015). There are many pragmatic obstacles to  
25 781 effective data sharing, such as the expertise, extra work, and costs to researchers to organize,  
26 782 serve, and preserve their data in a comprehensible manner, privacy and anonymity concerns for  
27 783 environmental data collected from private property, about human subjects, and balancing  
28 784 intellectual property concerns. Some environmental science research is intended to be  
29 785 confidential, such as private sector economic geology, agricultural chemical product  
30 786 development, and innumerable other corporate research efforts which are intended to develop  
31 787 products and recoup research and development investments. However, in our view, researchers  
32 788 on such ventures cannot have it both ways, by publishing some outcomes in the peer reviewed  
33 789 literature, but withholding the supporting data as private. A recent corporate initiative to make  
34 790 available traditionally protected crop safety information is noteworthy in this regard  
35 791 (<https://cropscience-transparency.bayer.com/>).

36 792 Most environmental science journals have policies encouraging and facilitating data sharing.  
37 793 SETAC journals are probably typical in requiring a statement by the authors’ whether and how  
38 794 the data underlying their analyses are available, with an admonition that authors should share

1  
2  
3 795 upon request. A passable statement may be something as feeble as “*Contact the Corresponding*  
4 796 *Author for data availability.*”

6 797 The strongest data disclosure policy for journals publishing in the environmental sciences is  
7 probably that developed for the Public Library of Science (PLOS) family of journals. “*PLOS*  
8 798 *journals require authors to make all data underlying the findings described in their manuscript*  
9 799 *fully available without restriction, with rare exception*” (PLOS 2014). Exceptions are limited to  
10 800 privacy or vulnerability concerns such as data on human research subjects that could not be fully  
11 801 anonymized, locations of archeological, fossil, or endangered species, that could be exploited or  
12 802 damaged, or safety and security considerations. Penalties for authors who fail to comply include  
13 803 rejection, or if they decline to provide data for an already published article, the editors could flag  
14 804 their article with a cautionary correction or even retract it (PLOS 2014). Whether PLOS’s stand  
15 805 requiring authors to make available all data underlying their findings will lead other journals to  
16 806 stiffen their resolve, or whether the comparatively lax policies of competing journals will  
17 807 undermine PLOS and other open-science advocates remains to be seen (Davis 2016; Nosek and  
18 808 39 co-authors 2015).  
19 809

20 810 Implicit to such requirements is the assumption that common understandings of what  
21 811 constitutes “raw data” will be contextual. Often, when researchers ask for raw data, what they  
22 812 really want are detailed and curated data summaries. Some “data points” such as a streamflow  
23 813 measurement or a chemical concentration in a medium are actually derived values, and the true  
24 814 raw data behind a data point includes survey data, unprocessed sensor readings, spectral outputs,  
25 815 and such. Unless the study involves methods comparisons or forensic data audits, usually the  
26 816 researcher just wants the resultant derived values at a level of detail sufficient to reconstruct and  
27 817 further analyze the original detail.

28 818 While the notion that investigators should preserve and share underlying data is simple, the  
29 819 reality of doing so is much more complicated and challenging. To us, it is a priority to strongly  
30 820 encourage, for without data, the credibility of science cannot be evaluated. Some research has  
31 821 shown the willingness and ability for authors to share data declines significantly with time, and  
32 822 having a weak data availability policy is only marginally better than having no policy at all  
33 823 (Vines et al. 2014). Computer servers get replaced, directories flushed, inactive files get dumped  
34 824 in office moves, and investigators move on, retire, and eventually die.

35 825 Rather than mandates, one simple incentive to improving openness in reporting has been for  
36 826 journals to award prominent open data “badges” for articles verified as being supported by  
37 827 available, correct, usable, and complete data. By showing an open data badge on the issue table  
38 828 of contents, article web page, and including a “verified open data” statement in the bibliographic  
39 829 indexing metadata, articles without such badge endorsement may be seen as incomplete. Over  
40 830 time, this might shift the norm toward open preservation and sharing. In at least one journal, this

1  
2  
3 831 approach appeared to markedly improve the sharing and preservation of data through linked,  
4 832 independent repositories (Kidwell et al. 2016).

### 7 833 *Critical Reviews and Literature Syntheses*

8 834 In ecotoxicology, published literature can roughly be broken down into two categories:  
9 835 original research and the review article. The original research article usually is based upon field  
10 836 observations, laboratory experiments, modelling, or blended approaches. Generalizing original  
11 837 articles through reviews and syntheses are critical parts of the ecotoxicology and most  
12 838 environmental science literature. Critical reviews, risk assessments, environmental quality  
13 839 standards, are based on syntheses of the literature, and not on individual studies. Synthesis  
14 840 articles have rather distinct scientific integrity problems from the original research article.  
15 841 Decisions must be made on how studies were located, results categorized, and a host of data  
16 842 manipulation and analyses decisions need to be made. These decisions and associated biases may  
17 843 be deliberate and clearly explained or the analyst may not even recognize that they have made a  
18 844 decision. In some cases we suspect analysts obscured their decisions. Systematic review  
19 845 methodology is now being used also for chemical assessments in which case data synthesis may  
20 846 be highly structured, with criteria clearly defined upfront for data inclusion and search strategies  
21 847 (Hobbs et al. 2005; Whaley et al. 2016). Other situations may follow the winding path of the  
22 848 present article: discussions among the authors “*have you seen so-and-so?*”, and readings that led  
23 849 to other relevant material through forward and backward citing, along with by some specific  
24 850 subject searches. This path led to much relevant and thoughtful material across many disciplines.  
25 851 But it was hardly systematic or reproducible.

26 852 Literature searches from different sources can yield very different results. For example, using  
27 853 a 2007 original research article on population modeling of selenium toxicity to trout (Van Kirk  
28 854 and Hill 2007), four leading bibliographic indexing services were searched for articles citing that  
29 855 study. Web of Science (WoS), Elsevier’s Scopus, Digital Science’s Dimensions, and Google  
30 856 Scholar found 7, 10, 15, and 22 citing publications respectively. Scopus found all articles found  
31 857 by WoS, plus articles WoS missed in *Human and Ecological Risk Assessment* and *IEAM*. Google  
32 858 Scholar found all articles found by Scopus and WoS, plus articles in *Ecotoxicology Modeling*,  
33 859 *Water Resources Research*, 3 government reports, 2 books, a thesis, a conference proceeding, a  
34 860 duplicate, and 2 ambiguous citations. It follows from this 3-fold difference in valid citations that  
35 861 a critical review of published literature on a topic or a regulatory assessment could miss relevant  
36 862 science if the assessors relied too heavily on a single search provider.

37 863 This simple example was from the “current era” of science, which began by 1996 or so,  
38 864 depending on which bibliographic indexing service scholars are using. Web sites for WoS and  
39 865 Scopus respectively report their indexing databases are reliable from 1971 and 1996 forward.

1  
2  
3 866 Relying exclusively on bibliographic index searching may omit important, relevant older  
4 867 research.

6 868 Thus, we have the indexing bias problem in meta-analyses and assessment (that not indexed  
7 869 won't be retrieved), and the related problem of reviewing the secondary source but citing the  
8 870 original. We have seen assessments that omitted seminal research published before the current  
9 871 digital era, which may reflect indexing bias. Ecotoxicology syntheses often rely on variations of  
10 872 species-sensitivity distributions, which may provide more explanations of statistical  
11 873 characteristics of the datasets, data extrapolations, transformations, normalizations, than on  
12 874 where the data came from in the first place. We have seen micrograms and milligrams mixed up,  
13 875 and rankings that mistakenly commingled endpoints such as time to death in hours with effects  
14 876 concentrations. Some of these issues are undoubtedly related to the online availability of well  
15 877 curated databases such as ECETOC Aquatic Toxicity (EAT) Database from the European Center  
16 878 for Ecotoxicology and Toxicology of Chemicals or the U.S. Environmental Protection Agency's  
17 879 EcoTox databases. These compiled databases are valuable resources but reliance on secondary,  
18 880 compilations deprive the original authors of credit via citations. At least for publicly funded  
19 881 science, citations may be a way that authors demonstrate the value of their work to the scientific  
20 882 community, and thus build the case for further funding. Further, reliance on secondary sources is  
21 883 a good way to introduce or repeat inaccuracies (Rekdal 2014). We echo previous calls for better  
22 884 training and rigor when conducting and reporting secondary analyses of ecotoxicology and  
23 885 related literature. Practices from other fields, such as the Cochrane systematic review approach  
24 886 and guidelines for the ethical reuse of data could be adapted to the ecotoxicology practice (Duke  
25 887 and Porter 2013; Roberts et al. 2006; Suter and Cormier 2015a).

### 36 888 *Environmental Chemistry*

37 889 Environmental chemistry has different scientific integrity challenges than the biological side  
38 890 of ecotoxicology. Unlike the situation in the biological side of ecotoxicology where serious  
39 891 questions have been aired about the reproducibility of some of the published research (Scott  
40 892 2012, 2018; Sumpter et al. 2014; Sumpter et al. 2016), analytical environmental chemistry does  
41 893 not appear to suffer from such problems to the same extent. The likely reason for this is that  
42 894 quality assurance mechanisms are routinely incorporated into analytical projects involving the  
43 895 measurement of environmental concentrations of chemicals, thus ensuring that the results are  
44 896 accurate. These include the use of high quality standards, which are widely available, the use of  
45 897 high specification instruments, and general guidelines proposed by national and international  
46 898 institutions. That combination enables recovery rates to be determined, preferably at different  
47 899 concentration ranges, for intra- and inter-day precision to be assessed, detection limits to be  
48 900 quantified, and matrix effects (interference from other substances) to be investigated. These



1  
2  
3 901 quality assurance procedures are adopted routinely, are always checked by reviewers of  
4 902 analytical papers, and ensure quality is maintained.

6 903 However, the reporting and interpretation of environmental chemistry has common pitfalls,  
7 904 particularly in analyses from large datasets or compiled databases, and in citation practices. For  
8 905 example, metadata specifying fundamental details may be missing or misunderstood, such as  
9 906 whether concentrations of metals or other elements in water are from filtered or unfiltered  
10 907 samples or if they reflect the total mass of the element or only one speciation state (Sprague et al.  
11 908 2017). Aquatic metals concentrations declined from mg/L levels in reports from the 1980s to  
12 909  $\mu\text{g/L}$  or sub  $\mu\text{g/L}$  levels by the late 1990s. This remarkable, widespread decline was not due to  
13 910 better pollution controls or global geochemical change, but to improved recognition and control  
14 911 of ubiquitous contamination in field and laboratory sampling and analysis methods. There are  
15 912 ongoing debates over the most appropriate sampling and analysis methods for inorganic water  
16 913 quality constituents particularly for environments that are expensive and difficult to sample  
17 914 representatively, such as large rivers. (Horowitz 2013). Such sampling biases and analytical  
18 915 method differences may be substantial enough to confound analyses.

25 916 Organic environmental chemistry datasets have similar pitfalls that can confound subsequent  
26 917 reviews and secondary analyses. For example, Kolpin et al (2002a) published a summary of a  
27 918 survey of different pharmaceuticals, hormones and other organic contaminants from 139 streams.  
28 919 This highly influential paper showed that some organic contaminants were widespread in streams  
29 920 and contributed to heightened concern and research interest in their potential health and  
30 921 environmental risks. The paper is presently the most highly cited paper ever published in the  
31 922 journal *Environmental Science & Technology* (1<sup>st</sup> of 46,011 papers published, with 5,104  
32 923 citations in the Scopus database as of 16 August 2018). However, reported concentrations of at  
33 924 least 1 of the 95 chemicals reported, 17 $\alpha$ -ethinyl estradiol (EE2), were questioned because the  
34 925 median and maximum concentrations of 73 and 831 ng/L, respectively were about 10 to 1000  
35 926 times higher than those from other surveys or analyses (Ericson et al. 2002; Hannah et al. 2009).  
36 927 Kolpin et al. (2002b) responded that upon further inspection, they had discovered that their  
37 928 maximum reported EE2 value of 831 ng/L was indeed incorrect owing to analytical  
38 929 interferences. They further explained that they had defined “median” in a peculiar way, as the  
39 930 median of detected values in streams, not in its usual meaning as a central tendency of all values.  
40 931 Because EE2 was undetectable in 94% of streams sampled, the median of detected values was  
41 932 skewed far above the median in all streams (<5 ng/L). However, despite the discovery of the  
42 933 mistakes, no correction was issued for the original publication. The Kolpin et al. (2002b)  
43 934 acknowledgment of the mistaken values was buried among the other 5,103 citing papers and the  
44 935 subtle, peculiar definition of a “median” was likely overlooked by most readers. As of August  
45 936 2018, at least 50 citing papers were identified that re-reported and perpetuated the exorbitant and  
46 937 mistaken 831 ng/L maximum EE2 value for U.S. streams.

1  
2  
3 938 Thus, it is easy for authors to easily misinterpret or to perpetuate erroneous relevant values  
4 939 from the literature. The problem of citing unreliable maximum values would be avoided if  
5 940 authors simply cited extreme statistics, such as percentile concentrations (e.g., the 10<sup>th</sup> to 90<sup>th</sup>, 5<sup>th</sup>  
6 941 to 95<sup>th</sup>, 1<sup>st</sup> to 99<sup>th</sup>) instead of ranges (Weltje and Sumpter 2017). Whereas a single extreme value  
7 942 defines the range, extreme percentiles are more representative of severe conditions that  
8 943 organisms may actually encounter and will be more stable and are far less vulnerable to be  
9 944 mistaken. For instance, Santore et al. (2018, their figure 9) elegantly summarized about 29,000  
10 945 paired reports from aggregated data sources of dissolved and total aluminum (Al) in freshwater.  
11 946 Logically, the dissolved fraction of trace metals in water can be no greater than the total,  
12 947 although in practice results don't always come out that way especially when the two values are  
13 948 close. Factors such as differences in sample digestion, differences between instruments, or slight  
14 949 differences in technique may introduce subtle analytical biases and impede reproducibility (Paul  
15 950 et al. 2016). In the Santore et al. (2018) comparison, at least 150 of the 29,000 Al pairs show the  
16 951 dissolved fraction is greater than the whole. While such logically impossible values should  
17 952 usually simply indicate that close to 100% of the total Al was present in dissolved form, some  
18 953 are obviously impossible values with the dissolved fraction 2-3 orders of magnitude higher than  
19 954 the total concentration. Should an imprudent analyst uncritically report on ranges of dissolved  
20 955 and total Al, they would report nonsense results. Simply backing off to the 99<sup>th</sup> or 95<sup>th</sup> percentile  
21 956 for a large dataset such as this one would still reflect the extremes of environmental conditions  
22 957 but be somewhat insulated from dubious, single values.  
23  
24  
25  
26  
27  
28  
29  
30  
31

### 32 33 958 **Advocacy**

34 959 Science is the enterprise for answering questions and making predictions about the how the  
35 960 universe works. Science can inform issues, but science can never answer “should” questions. For  
36 961 example, science cannot tell societies whether they should restrict chemical uses and releases,  
37 962 whether natural preserves should be set aside from human exploitation, or whether biodiversity  
38 963 should be protected. These are among the myriad value judgements that societies must make, and  
39 964 while science can support societies in making these choices through predictions founded upon a  
40 965 body of knowledge, there are never “scientifically correct” answers to questions of human  
41 966 values, morals, and ethics (Snyder and Hooper-Bui 2018). Scientists are humans, and like all  
42 967 people, hold ethical and moral values which drive assumptions which may not be explicitly  
43 968 stated if even recognized. For example, the notion of “environmental protection” in the  
44 969 environmental toxicology field is rooted in societal norms, statues, and international agreements  
45 970 with goals of minimizing harm (a human concept) from activities such as extraction,  
46 971 manufacture, use, and disposal of chemical products. Scientists in the field develop informed  
47 972 opinions toward the “should” questions relating to their experiences, which leads to questions of  
48 973 whether and how scientists advocate for “should” questions.  
49  
50  
51  
52  
53  
54  
55  
56  
57  
58  
59  
60

1  
2  
3 974 The underpinnings of science are that researchers have no vested interest in the results of their  
4 975 observations, that they objectively record and analyze these results, and that they fairly report the  
5 976 outcomes in the peer-reviewed literature. Advocacy can compromise these underpinnings, at the  
6 977 cost of scientists' credibility (Fenn and Milton 1997). Scientists tend to be passionate about their  
7 978 science, which has led to controversy over the role that scientists should play in related public  
8 979 policy debates. While we think most scientists would agree that advocacy for science having a  
9 980 role in environmental policy debates is appropriate, there is likely much less agreement whether  
10 981 it is appropriate for scientists to advocate for particular outcomes in policy debates. If the policy  
11 982 debate turns on questions of science central to a scientist's particular area of study, probably no  
12 983 one is better positioned than that scientist to lay out the evidence for or against a particular  
13 984 course of action. If the scientist is regarded as a neutral and informed voice, their advice may be  
14 985 valued by all sides in a policy dispute (Sedlak 2016). However, if the scientist's experience or  
15 986 analyses leads them to the strong conviction that one policy direction is more correct and should  
16 987 be adopted, then they are no longer a neutral broker and have become an advocate.

17  
18  
19 988 When questions of science are central to adversarial adjudicated proceedings, the protagonists  
20 989 controlling the proceedings are often lawyers. The lawyers are expected to advocate for their  
21 990 client's interest; not for objective science. The lawyers retain consulting scientists as expert  
22 991 witnesses to support their side of the case. The lawyers' will presumably seek out scientists  
23 992 whose research findings and views will increase their chance of winning. In the close, intense  
24 993 working environment of a team preparing for a complex, science-based legal strategy, it is easy  
25 994 for scientists to get caught up in the enthusiasm of a "team spirit" with a loss of detached  
26 995 impartiality and objectivity. Scientists who begin to function as "hired guns" focused on team  
27 996 wins are no longer scientists but advocates (Christensen and Klauda 1988).

28  
29  
30  
31 997 Policy advocacy is potentially problematic because it may compromise use of research  
32 998 findings in policy and management deliberations if the information is not viewed as credible by  
33 999 all sides (Scott et al. 2007). In some situations, advocacy is beyond reproach, such as a university  
34 1000 scientist who uncovered a lead poisoned community water system. Simply reporting the findings  
35 1001 to the responsible officials likely would have been ineffective, if the ineptitude or indifference of  
36 1002 those same responsible officials contributed to the situation in the first place (Sedlak 2016).  
37 1003 However, not all situations are so clear cut, and reasonable people who share similar  
38 1004 motivations, skills, and agree that researchers should do the right thing may not agree on what  
39 1005 that is. Deliberations on major environmental issues are complex and science may only be one  
40 1006 element of the deliberations. Developing and providing technical and scientific information to  
41 1007 inform policy deliberations in an objective and relevant way is a formidable challenge (Meyer et  
42 1008 al. 2010; Nelson and Vucetich 2009).

1  
2  
3 1009 Institutional constraints aside, how scientists balance these competing issues and choose when  
4 1010 or whether to engage in advocacy is a deeply personal choice and is situational (Meyer et al.  
5 1011 2010; Sedlak 2016). However, just as science journals discourage comingling original research  
6 1012 results and commentary, scientists should keep science and advocacy distinct in their  
7 1013 publications and speaking. In particular, we argue that scientists should be watchful for stealth  
8 1014 policy advocacy. Stealth advocacy is the use of value-laden language in scientific writing that  
9 1015 assumes a policy preference (Lackey 2007; Pielke 2007). Rather than openly disclosing assumed  
10 1016 values or policy preferences, biases may be unconsciously (or deliberately) cloaked through  
11 1017 normative science. Normative science is science developed, presented, or interpreted all based on  
12 1018 an assumed, usually unstated, preference for a particular policy or class of policy choices. This  
13 1019 covert advocacy may be reflected in word choices, and such advocacy is not always apparent  
14 1020 even to the advocate. For instance, value-laden words such as *stressors*, *impacted*, *degraded*,  
15 1021 *improved*, *good*, and *poor* may be used to describe habitats or other environmental features. Less  
16 1022 value-laden words would be *factors*, *exposed*, *altered*, *changed*, *increased*, or *decreased*. The use  
17 1023 of normative science is potentially insidious because the tacit, usually unstated, preference for a  
18 1024 particular policy or class of policy choices is not perceptibly normative to policy makers or even  
19 1025 to many scientists (Lackey 2007).

20  
21  
22  
23  
24  
25  
26  
27  
28 1026 Criticisms of normative science can be excessive, as taken literally, the entire discipline of  
29 1027 conservation biology could be considered too normative. Similarly, the mission statement of  
30 1028 SETAC “*to support the development of principles and practices for protection, enhancement and*  
31 1029 *management of sustainable environmental quality and ecosystem integrity*” could be too much  
32 1030 for some. Science is normative, with topics and study questions influenced by normative treaties  
33 1031 and regulations. Areas of study or techniques once considered appropriate areas of science  
34 1032 inquiry such as craniometry, eugenics, or experimentation on human subjects without informed  
35 1033 consent are no longer considered to be within the norms of ethical science. Within environmental  
36 1034 toxicology, pressure to reduce the use of animal testing might be an example of normative  
37 1035 science.

38  
39  
40  
41  
42  
43 1036 Our point is not to argue for or against scientists engaging in overt policy advocacy, which is  
44 1037 a personal decision, but for clarity and transparency. Just as original results, opinion, judgements  
45 1038 and speculation should not be blended in a scientific paper, science and advocacy need some  
46 1039 separation (Scott and Rachlow 2011). Covert advocacy is a form of bias. Environmental  
47 1040 scientists should clearly differentiate between research findings and policy advocacy based upon  
48 1041 those findings.

### 49 50 51 52 53 1042 **Weaponizing scientific integrity and transparency**

54 1043 We recognize that “scientific integrity” discussions can easily be diminished to going down  
55 1044 the path carved by “sound science” strategic initiatives, which often boiled down to campaigns to

1  
2  
3 1045 call “*my science good science and your science junk*” (Doremus 2007; Kapustka 2016; McGarity  
4 1046 2003; Oreskes and Conway 2011). The goal may be to recast policy, ideological, or economic  
5 1047 disputes as doubt or created conflicts in science. In countries with a tort-based, adversarial legal  
6 1048 system for resolving injuries or damages, science-based information becomes just another tool  
7 1049 for dueling experts, who often have primary responsibility for advocating for the interests of  
8 1050 their client (Wagner 2005). Research integrity policies or requirements for data transparency can  
9 1051 be used as weapons to bury public university or government scientists with vexatious, intrusive,  
10 1052 and costly demands for records such as raw laboratory notebooks, instrument calibration records,  
11 1053 emails between coauthors, working drafts, and peer comments and responses. Such demands can  
12 1054 be effective tools for interfering with the work of public-sector scientists, including academics in  
13 1055 public institutions (Folta 2015; Halpern and Mann 2015; Kloor 2015; Kollipara 2015;  
14 1056 Lewandowsky and Bishop 2016), or academics in private institutions but who receive research  
15 1057 support from public sources (Hey and Chalmers 2010; Shrader-Frechette 2012). For example,  
16 1058 Deborah Swackhamer, an environmental chemist at the University of Minnesota, was targeted  
17 1059 under state sunshine laws with legal demands for raw unpublished data, class notes, purchase  
18 1060 records, telephone records, and more from a 15-year period. Ironically, the identity of those  
19 1061 seeking the information was shielded behind the law firm communicating the demands (Halpern  
20 1062 2015). Some scientists have learned to use transparency laws against their peers in the highly  
21 1063 competitive arena of grant funding. Through freedom of information demands for competing  
22 1064 grant proposals, scientists have been able to obtain details on competitors’ new research  
23 1065 direction, preliminary results, and cost structure. For those targeted scientists, such information  
24 1066 gathering may be seen as research espionage under the rubric of transparency (Carey and  
25 1067 Woodward 2017).

26  
27  
28  
29  
30  
31  
32  
33  
34  
35  
36  
37 1068 The sunshine laws enacted in many jurisdictions were intended to illuminate the business of  
38 1069 government officials and were doubtfully intended by their crafters to sweep up university  
39 1070 professors. Nevertheless, some see scientists are fair targets of such tactics, as inspections of  
40 1071 their erstwhile private communications have uncovered undisclosed conflicts of interest or bias  
41 1072 (e.g., Russell et al. 2010). Privately funded research is generally shielded from such practices  
42 1073 (Brain et al. 2016; Wagner and Michaels 2004). Researchers at private institutions may however  
43 1074 be subject to baseless litigation to intimidate scientists and deter others by inflicting long and  
44 1075 costly legal processes, disruption, and threats of personal financial liability. Such harassing  
45 1076 lawsuits have been employed often enough to get a name, SLAPP suits for Strategic Litigation  
46 1077 Against Public Participation (Johnson 2007; Nature Medicine Editors 2017; Robbins 2017).  
47 1078 While legal, such strategies represent detrimental practices cloaked in the vernacular of  
48 1079 transparent science (Johnson 2007; Levy and Johns 2016; McGarity and Wagner 2008; Wagner  
49 1080 and Michaels 2004).

## 1081 **Education as the way forward**

1082 It is one thing to realize that there is a problem, but quite another to find an effective solution  
1083 to that problem. The unethical behaviors discussed above are primarily a consequence of the  
1084 perverse incentives under which scientists currently operate. These incentives are publications  
1085 and grants. In the case of publications, the number of these seems to be much more important  
1086 than their quality. This is probably because assessing the quality of a scientific article is not easy;  
1087 there is no established, widely accepted way of doing this. The ‘status’ of the journal in which an  
1088 article is published, which is most often taken to be the impact factor of that journal, also is  
1089 considered an important factor. Hence scientists strive to get their papers published in journals  
1090 with high impact factors; and may act unethically to do so. In the case of grants, the more, and  
1091 bigger, they are, the better, as far as institutions are concerned. These incentives, particularly  
1092 those concerning publications (‘the more the merrier’), are probably responsible for the many  
1093 lapses in integrity currently obvious and prevalent in ecotoxicology. Moving from the present  
1094 situation to a significantly more ethical one in which integrity is central to any endeavor in  
1095 ecotoxicology will not be easy to accomplish, nor will it be achieved quickly.

1096 Education of ecotoxicologists, both young and old, is the only way forward towards better  
1097 integrity in our discipline. That education can be delivered in a variety of ways, the two most  
1098 obvious and practical being (1) the publication of articles in journals in which integrity and  
1099 ethics are discussed, and (2) courses run by scientific societies such as SETAC. This article is an  
1100 example of a very direct attempt at highlighting integrity issues in our field, with the hope that by  
1101 making ecotoxicologists aware of these unethical practices they will change their behavior and  
1102 act more ethically. Other, less direct, attempts have involved the publication of papers covering  
1103 suggestions for how to improve the quality of ecotoxicology research, from the planning stage  
1104 (Harris et al. 2014) to the publication stage (e.g., Hanson et al. 2017; Moermond et al. 2016).  
1105 However, it seems unlikely that published papers alone will have a significant influence on the  
1106 quality of ecotoxicology research because few scientists will be aware of them, and even fewer  
1107 will read them carefully and subsequently act on the advice in them.

1108 Although there has been some public discussion about what training and skills the  
1109 ecotoxicologists of the future will require (Harris et al. 2017), this crucial aspect of producing  
1110 better ecotoxicologists, capable of doing better, and hence more useful, research has rarely been  
1111 addressed. Yet there are undoubtedly things that could be done to better educate the  
1112 ecotoxicologists of the future. A radical proposal would be to require aspiring ecotoxicologists to  
1113 pass examinations before they are allowed to practice ecotoxicology, either as researchers or  
1114 regulators. Many professions do insist that its practitioners pass examinations before they are  
1115 allowed to practice: doctors, dentists, accountants and lawyers are obvious examples. This  
1116 strategy ensures that practitioners are adequately trained. As a first step towards the goal of

1  
2  
3 1117 ensuring all ecotoxicologists are appropriately trained, specific courses could be introduced, and  
4 1118 attendance become mandatory. Courses on topics such as experimental design, statistical  
5 1119 analysis, data presentation and how to write a scientific paper could be designed easily. In fact,  
6 1120 many research organizations and some industries already run ‘in house’ courses on these topics.  
7 1121 It would be equally feasible to design a course on integrity in ecotoxicology research. In fact, as  
8 1122 the issue of integrity (or, more accurately, the lack of it) has gained in prominence in the last few  
9 1123 years, some organizations have responded by running training courses for their young scientists  
10 1124 on integrity and ethical behavior in research. SETAC could offer such training courses and does  
11 1125 so to a limited extent already. Another possibility would be for consultancy companies to  
12 1126 develop and run these training courses for clients, who could be universities, research  
13 1127 organizations or industrial companies. Consultancy companies that specialized exclusively in  
14 1128 providing training could be established; this has happened already in many other professions.

15 1129 In summary, identifying that there are problems with the way ecotoxicologists are trained  
16 1130 currently about integrity issues in their discipline is only the first step. Much better education of  
17 1131 ecotoxicologists (both those starting their careers and those well-established already) is  
18 1132 desperately needed. Such education will need to be provided in a range of formats, to maximize  
19 1133 its chances of succeeding. But if ecotoxicology is to be taken seriously as a profession, change  
20 1134 and improve it must. The environment cannot be protected by poor quality ecotoxicology.

### 21 1135 **Promoting scientific integrity in environmental toxicology**

22 1136 Scientific integrity is harnessed by high quality environmental research characterized by rigor,  
23 1137 relevance, reproducibility, and objectivity. Our review suggested several conclusions, tangible  
24 1138 actions and less tangible directions that professional societies such as SETAC could do to  
25 1139 encourage scientists, their supporting institutions, and science journals to maintain and improve a  
26 1140 culture of science integrity. Scientific integrity is reinforced through full transparency  
27 1141 exemplified by full disclosures of potential conflicting and competing interests that could  
28 1142 contribute to bias, and by making all data and observations readily accessible. Specifically:

- 29 1143 1. Scientific integrity in ecotoxicology and the environmental sciences cannot be ensured by  
30 1144 impeccable policies or checklists. It is an attitude to be embraced, maintained, and  
31 1145 enforced through the support, guidance and approval of one’s peers through a community  
32 1146 of practices.
- 33 1147 2. Reliability, rigor, relevance and reproducibility of science are more important than novel  
34 1148 advances, if those advances neglect these “four Rs.”
- 35 1149 3. Increased attention to a culture of quality management training and transparency could  
36 1150 improve the confidence in published findings.
- 37 1151 4. Studies that are not supported by primary data released through data repositories or  
38 1152 detailed supporting information are not fully credible.
- 39 1153 5. Journal publishers and editors could strongly encourage the complete presentation of  
40 1154 supporting data, with prominent labeling on the journal and article front matter indicating

- 1  
2  
3 1155 whether data are available. They should caution authors at the outset that the inability to  
4 1156 produce data upon request could be cause for retraction.
- 5 1157 6. One practical step investigators can take toward improving reproducibility of experiments  
6 1158 would be to produce detailed video illustration of their methods.
  - 7 1159 7. As a community, be aware of and disclose potential conflicting or competing interests  
8 1160 that could contribute to, or be perceived as, bias and not tolerate extreme conflicts or bias.
  - 9 1161 8. Discourage judging science by its funder; rather, open-minded skepticism is applicable  
10 1162 when the funder has a stake in the outcome of a study.
  - 11 1163 9. Scientists, like all people, have moral and ethical assumptions, based upon their values.  
12 1164 These should not be intermixed with their interpretations and reporting of science. If  
13 1165 scientists' values lead them to cross the lines from analysis to advocacy, they need to be  
14 1166 particularly careful about distinguishing between science, values, assumptions, and  
15 1167 opinion.
  - 16 1168 10. Professional societies such as SETAC have an important role in fostering respectful  
17 1169 evidence-based dialog, in meetings and correspondence on published works.
  - 18 1170 11. Professional societies such as SETAC could support a standing training seminar on  
19 1171 principles of scientific integrity, the transparent conduct of science and best practices for  
20 1172 peer review in conjunction with its annual meetings.
  - 21 1173 12. Professional societies such as SETAC have a valuable role in facilitating balanced, expert  
22 1174 reviews of controversial science topics, such as has been done with their Pellston  
23 1175 Workshops series and resulting publications.  
24 1176

## 29 1177 **Supplemental Information**

### 30 1178 SI 1. Peer review process

## 31 1179 **Acknowledgements**

32 1180 We thank the four anonymous peer reviewers and the two institutional reviewers for their  
33 1181 constructive criticisms and insights. This commentary and perspectives followed discussions by  
34 1182 the Society of Environmental Toxicology and Chemistry (SETAC) ad hoc subcommittee on  
35 1183 Scientific Integrity (Fairbrother 2016). Author roles: CAM wrote most of the paper, with  
36 1184 contributions by JPS and AF. All other authors participated in discussions, reviewed and edited  
37 1185 the drafts, supported the recommendations, and approved of its publication. Specific required  
38 1186 disclaimers: The views expressed in this article are those of the authors and do not necessarily  
39 1187 represent the views or policies of SETAC, the U.S. Environmental Protection Agency, or the  
40 1188 U.S. Fish and Wildlife Service. Affiliations are given for identification, but do not necessarily  
41 1189 imply endorsement. Author affiliations reflect a variety of academic, business, and governmental  
42 1190 employment, and all authors have competing interests from our previous experiences and work  
43 1191 environments, but hopefully these were somewhat balanced out. No specific funding was  
44 1192 provided for the writing of this manuscript and no financial conflicts of interest were declared by  
45 1193 any author.



## References

- 1  
2  
3  
4 1194
- 5 1195 AAAS. 2000. The Role and Activities of Scientific Societies in Promoting Research Integrity. April 10-  
6 1196 11, 2000. American Association for the Advancement of Science (AAAS) and the 24 pp.  
7 1197 <https://www.aaas.org/page/scientific-integrity>.
- 8 1198 Alberts, B. 2012. Editor's note [A bacterium that can grow using arsenic instead of phosphorus]. *Science*.  
9 1199 334(6034): 1149. <https://doi.org/10.1126/science.1208877>
- 10 1200 Anderson, K., 2017, Trust Falls — Are We In a New Phase of Corporate Research? (August 15, 2017),  
11 1201 *Scholarly Kitchen* at [https://scholarlykitchen.sspnet.org/2017/08/15/trust-falls-new-phase-](https://scholarlykitchen.sspnet.org/2017/08/15/trust-falls-new-phase-corporate-research/)  
12 1202 [corporate-research/](https://scholarlykitchen.sspnet.org/2017/08/15/trust-falls-new-phase-corporate-research/).
- 13 1203 ARC. 2007. Australian Code for the Responsible Conduct of Research. Australian Research Council  
14 1204 (ARC). <http://www.arc.gov.au/research-integrity>.
- 15 1205 Arciszewski, T.J. and K.R. Munkittrick. 2015. Development of an adaptive monitoring framework for  
16 1206 long-term programs: An example using indicators of fish health. *Integrated Environmental*  
17 1207 *Assessment and Management*. 11(4): 701-718. <https://doi.org/10.1002/ieam.1636>
- 18 1208 Atkinson, R.L. and I. Macdonald. 2010. White hat bias: The need for authors to have the spin stop with  
19 1209 them. *International Journal of Obesity*. 34(1): 83-83. <https://doi.org/10.1038/ijo.2009.269>
- 20 1210 Augspurger, T. 2014. SETAC Hosts Successful TSCA [Toxic Substances Control Act] Risk Assessment  
21 1211 Science Seminar for Congressional Staff (6 November 2014). *SETAC Globe*. 15(11)
- 22 1212 Baba, A., D.M. Cook, T.O. McGarity, and L.A. Bero. 2005. Legislating “Sound Science”: The Role of  
23 1213 the Tobacco Industry. *American Journal of Public Health*. 95(S1): S20-S27.  
24 1214 <https://doi.org/10.2105/AJPH.2004.050963>
- 25 1215 Baethge, C. 2013. The effect of a conflict of interest disclosure form using closed questions on the  
26 1216 number of positive conflicts of interest declared – a controlled study. *PeerJ*. 1: e128.  
27 1217 <https://doi.org/10.7717/peerj.128>
- 28 1218 Baker, M. 2016a. 1,500 scientists lift the lid on reproducibility. *Nature*. *Nature*.  
29 1219 <https://doi.org/10.1038/533452a>
- 30 1220 Baker, M. 2016b. How quality control could save your science. *Nature*. 529: 456–458.  
31 1221 <https://doi.org/10.1038/529456a>
- 32 1222 Bernhardt, E.S., E.J. Rosi, and M.O. Gessner. 2017. Synthetic chemicals as agents of global change.  
33 1223 *Frontiers in Ecology and the Environment*. 15(2): 84-90. <https://doi.org/10.1002/fee.1450>
- 34 1224 Bero, L., A. Anglemeyer, H. Vesterinen, and D. Krauth. 2016. The relationship between study  
35 1225 sponsorship, risks of bias, and research outcomes in atrazine exposure studies conducted in non-  
36 1226 human animals: Systematic review and meta-analysis. *Environment International*. 92-93: 597-  
37 1227 604. <https://doi.org/10.1016/j.envint.2015.10.011>
- 38 1228 Bes-Rastrollo, M., M.B. Schulze, M. Ruiz-Canela, and M.A. Martinez-Gonzalez. 2014. Financial  
39 1229 Conflicts of Interest and Reporting Bias Regarding the Association between Sugar-Sweetened  
40 1230 Beverages and Weight Gain: A Systematic Review of Systematic Reviews. *PLOS Medicine*.  
41 1231 10(12): e1001578. <https://doi.org/10.1371/journal.pmed.1001578>
- 42 1232 Blumenstyk, G. 2007. When Research Criticizes an Industry. *Chronicle of Higher Education*. 54(4): A21
- 43 1233 Boden, L.I. and D. Ozonoff. 2008. Litigation-Generated Science: Why Should We Care? *Environmental*  
44 1234 *Health Perspectives*. 116(1): 117-122
- 45 1235 Boehm, P.D. and T.C. Ginn. 2013. The Science of Natural Resource Damage Assessments.  
46 1236 *Environmental Claims Journal*. 25(3): 185-225. <https://doi.org/10.1080/10406026.2013.785910>
- 47 1237 Bohannon, J. 2013. Who's Afraid of Peer Review? *Science*. 342(6154): 60-65.  
48 1238 <https://doi.org/10.1126/science.342.6154.60>
- 49 1239 Boone, M.D., C.A. Bishop, L.A. Boswell, R.D. Brodman, J. Burger, C. Davidson, M. Gochfeld, J.T.  
50 1240 Hoverman, L.A. Neuman-Lee, R.A. Relyea, J.R. Rohr, C. Salice, R.D. Semlitsch, D. Sparling,  
51 1241 and S. Weir. 2014. Pesticide Regulation amid the Influence of Industry. *BioScience*. 64(10): 917-  
52 1242 922. <https://doi.org/10.1093/biosci/biu138>

- 1  
2  
3 1243 Bornstein-Forst, S.M. 2017. Establishing Good Laboratory Practice at Small Colleges and Universities.  
4 1244 *Journal of Microbiology & Biology Education*. 18(1): 18.1.10.  
5 1245 <https://doi.org/10.1128/jmbe.v18i1.1222>  
6 1246 Borrell, B. 2009. National Academy as *National Enquirer*? PNAS Publishes Theory That Caterpillars  
7 1247 Originated from Interspecies Sex. *Scientific American*. August 24, 2009  
8 1248 Brain, R., J. Stavelly, and L. Ortego. 2016. In Response: Resolving the perception of bias in a discipline  
9 1249 founded on objectivity—A perspective from industry. *Environmental Toxicology and Chemistry*.  
10 1250 35(5): 1070-1072. <https://doi.org/10.1002/etc.3357>  
11 1251 Brix, K.V., D.K. DeForest, and W.J. Adams. 2011. The sensitivity of aquatic insects to divalent metals: A  
12 1252 comparative analysis of laboratory and field data. *Science of the Total Environment*. 409(20):  
13 1253 4187-4197. <https://doi.org/10.1016/j.scitotenv.2011.06.061>  
14 1254 Brix, K.V., A.J. Esbaugh, K.M. Munley, and M. Grosell. 2012. Investigations into the mechanism of lead  
15 1255 toxicity to the freshwater pulmonate snail, *Lymnaea stagnalis*. *Aquatic Toxicology*. 106–107(0):  
16 1256 147-156. <https://doi.org/10.1016/j.aquatox.2011.11.007>  
17 1257 Bui, C., R. Parrish, M. Meredith, and J. Giddings, editors. 2004. *A History of SETAC Part 1: The*  
18 1258 *Beginning*. SETAC Press, Pensacola, FL, 36 pp  
19 1259 Burton, G.A., R. Di Giulio, D. Costello, and J.R. Rohr. 2017. Slipping through the Cracks: Why is the  
20 1260 U.S. Environmental Protection Agency Not Funding Extramural Research on Chemicals in Our  
21 1261 Environment? *Environmental Science & Technology*. 51(2): 755-756.  
22 1262 <https://doi.org/10.1021/acs.est.6b05877>  
23 1263 Burton, G.A. and C.H. Ward. 2012. Editorial preface [letters to the editor on the Exxon Valdez oil spill  
24 1264 and pink salmon]. *Environmental Toxicology and Chemistry*. 31(3): 469-469.  
25 1265 <https://doi.org/10.1002/etc.1741>  
26 1266 Burwell, S.M., S. VanRoekel, T. Park, and D.J. Mancini. 2013. Open Data Policy-Managing Information  
27 1267 as an Asset. U.S. Office of Management and Budget M-13-13.  
28 1268 <https://obamawhitehouse.archives.gov/sites/default/files/omb/memoranda/2013/m-13-13.pdf>  
29 1269 [Accessed 15 September 2018].  
30 1270 Buys, D.J., A.R. Stojak, W. Stiteler, and T.F. Baker. 2015. Ecological risk assessment for residual coal fly  
31 1271 ash at Watts Bar Reservoir, Tennessee: Limited alteration of riverine-reservoir benthic  
32 1272 invertebrate community following dredging of ash-contaminated sediment. *Integrated*  
33 1273 *Environmental Assessment and Management*. 11(1): 43-55. <https://doi.org/10.1002/ieam.1577>  
34 1274 Calfee, R.D., H.J. Puglis, E.E. Little, W.G. Brumbaugh, and C.A. Mebane. 2016. Quantifying Fish  
35 1275 Swimming Behavior in Response to Acute Exposure of Aqueous Copper Using Computer  
36 1276 Assisted Video and Digital Image Analysis. *Journal of Visualized Experiments*. (108): e53477.  
37 1277 <https://doi.org/doi:10.3791/53477>  
38 1278 Callaway, E. 2015. Faked peer reviews prompt 64 retractions (18 August 2015). *Nature*.  
39 1279 <http://dx.doi.org/10.1038/nature.2015.18202>. <https://doi.org/10.1038/nature.2015.18202>  
40 1280 Campbell, T. and J. Friesen. 2015. Why people "fly from facts": Research shows the appeal of untestable  
41 1281 beliefs and how they lead to a polarized society (March 3, 2015). *Scientific American*.  
42 1282 Carey, T.L. and A. Woodward, 2017, These Scientists Got To See Their Competitors' Research Through  
43 1283 Public Records Requests (September 2, 2017), *BuzzFeed News* at  
44 1284 <https://www.buzzfeednews.com/article/teresacarey/when-scientists-foia>.  
45 1285 Christensen, S.W. and R.J. Klauda. 1988. Two scientists in the courtroom: what they didn't teach us in  
46 1286 graduate school. *American Fisheries Society Monograph*. 4: 307-315  
47 1287 Collins, S.L. and J.M. Verdier. 2017. The Coming Era of Open Data. *BioScience*. 67(3): 191-192.  
48 1288 <https://doi.org/10.1093/biosci/bix023>  
49 1289 Cope, M.B. and D.B. Allison. 2009. White hat bias: examples of its presence in obesity research and a  
50 1290 call for renewed commitment to faithfulness in research reporting. *International Journal of*  
51 1291 *Obesity*. 34(1): 84-88  
52 1292 Couzin-Frankel, J. 2017. Firing of veteran NIH scientist prompts protests over publication ban (February  
53 1293 22, 2017). *Science*. <https://doi.org/10.1126/science.aal0808>

- 1  
2  
3 1294 Cranor, C.F. 2008. The Tobacco Strategy Entrenched. *Science*. 321(5894): 1296-1297.  
4 1295 <https://doi.org/10.1126/science.1162339>
- 5 1296 Curfman, G.D., S. Morrissey, and J.M. Drazen. 2005. Expression of Concern: Bombardier et al.,  
6 1297 “Comparison of Upper Gastrointestinal Toxicity of Rofecoxib and Naproxen in Patients with  
7 1298 Rheumatoid Arthritis,” *N Engl J Med* 2000;343:1520-8. *New England Journal of Medicine*.  
8 1299 353(26): 2813-2814. <https://doi.org/doi:10.1056/NEJMe058314>
- 9 1300 Davis, P., 2016, *Scientific Reports* On Track To Become Largest Journal In The World (August 23,  
10 1301 2016), *Scholarly Kitchen* at [https://scholarlykitchen.sspnet.org/2016/08/23/scientific-reports-on-](https://scholarlykitchen.sspnet.org/2016/08/23/scientific-reports-on-track-to-become-largest-journal-in-the-world/)  
11 1302 [track-to-become-largest-journal-in-the-world/](https://scholarlykitchen.sspnet.org/2016/08/23/scientific-reports-on-track-to-become-largest-journal-in-the-world/).
- 12 1303 DeForest, D.K. and E.J. Van Genderen. 2012. Application of U.S. EPA guidelines in a bioavailability-  
13 1304 based assessment of ambient water quality criteria for zinc in freshwater. *Environmental*  
14 1305 *Toxicology and Chemistry*. 31(6): 1264–1272. <https://doi.org/10.1002/etc.1810>
- 15 1306 Descamps, H. 2008. Natural resource damage assessment (NRDA) under the European Directive on  
16 1307 Environmental Liability: a comparative legal point of view. *Océanis*. 32(3/4): 439-462
- 17 1308 Dixon, P.M. and J.H.K. Pechmann. 2005. A statistical test to show negligible trend. *Ecology*. 86(7):  
18 1309 1751–1756. <https://doi.org/10.1890/04-1343>
- 19 1310 Doremus, H. 2007. Scientific and Political Integrity in Environmental Policy. *Texas Law Journal*. 86:  
20 1311 1601-1653
- 21 1312 Douglas, H. 2015. Politics and Science: Untangling Values, Ideologies, and Reasons. *The ANNALS of the*  
22 1313 *American Academy of Political and Social Science*. 658: 296-306  
23 1314 <https://doi.org/10.1177/0002716214557237>
- 24 1315 Douglas, H.E. 2014. Scientific Integrity in a politicized world. Pages 254-268 in P. Schroeder-Heister, G.  
25 1316 Heinzmann, W. Hodges, and P. E. Bour, editors. *Logic, Methodology and Philosophy of Science.*  
26 1317 *Proceedings of the Fourteenth International Congress (Nancy, France)*.
- 27 1318 Duke, C.S. and J.H. Porter. 2013. The ethics of data sharing and reuse in biology. *BioScience*. 63(6): 483-  
28 1319 489. <https://doi.org/10.1525/bio.2013.63.6.10>
- 29 1320 Edwards, A. 2016. Reproducibility: Team up with industry. *Nature*. 531(301): 299-301.  
30 1321 <https://doi.org/10.1038/531299a>
- 31 1322 Edwards, M.A. and S. Roy. 2016. Academic Research in the 21st Century: Maintaining Scientific  
32 1323 Integrity in a Climate of Perverse Incentives and Hypercompetition. *Environmental Engineering*  
33 1324 *Science*. 34(1): 51-61. <https://doi.org/10.1089/ees.2016.0223>
- 34 1325 Elliott, E.D. 1988. The Future of Toxic Torts: Of Chemophobia, Risk as a Compensable Injury and  
35 1326 Hybrid Compensation Systems. *Houston Law Review*. 25: 781-799
- 36 1327 Elliott, K.C. 2014. Financial conflicts of interest and criteria for research credibility. *Erkenntnis*. 79(5):  
37 1328 917-937. <https://doi.org/10.1007/s10670-013-9536-2>
- 38 1329 Elliott, K.C. 2016. Standardized Study Designs, Value Judgments, and Financial Conflicts of Interest in  
39 1330 Research. *Perspectives on Science*. 24(5): 529-551. [https://doi.org/10.1162/POSC\\_a\\_00222](https://doi.org/10.1162/POSC_a_00222)
- 40 1331 Enserink, M. 2014. Sabotaged Scientist Sues Yale and Her Lab Chief. *Science*. 343(6175): 1065-1066.  
41 1332 <https://doi.org/10.1126/science.343.6175.1065>
- 42 1333 Enserink, M. 2017. A groundbreaking study on the dangers of 'microplastics' may be unraveling (March  
43 1334 21, 2017). *Science*. <https://doi.org/10.1126/science.aal0939>
- 44 1335 Ericson, J.F., R. Laenge, and D.E. Sullivan. 2002. Comment on “Pharmaceuticals, Hormones, and Other  
45 1336 Organic Wastewater Contaminants in U.S. Streams, 1999–2000: A National Reconnaissance”.  
46 1337 *Environmental Science & Technology*. 36(18): 4005-4006. <https://doi.org/10.1021/es0200903>
- 47 1338 European Commission, 2016, Open Access to scientific information | Digital Single Market (October 28,  
48 1339 2016), at <https://ec.europa.eu/digital-single-market/en/open-access-scientific-information>.
- 49 1340 Fairbrother, A. 2016. New Subcommittee on Scientific Integrity (18 February 2016). *SETAC Globe*. 17(2)
- 50 1341 Fairbrother, A. and R.S. Bennett. 1999. Ecological Risk Assessment and the Precautionary Principle.  
51 1342 *Human and Ecological Risk Assessment: An International Journal*. 5(5): 943-949.  
52 1343 <https://doi.org/10.1080/10807039991289220>

- 1  
2  
3 1344 Fanelli, D. 2009. How Many Scientists Fabricate and Falsify Research? A Systematic Review and Meta-  
4 1345 Analysis of Survey Data. *PLoS ONE*. 4(5): e5738. <https://doi.org/10.1371/journal.pone.0005738>
- 5 1346 Fanelli, D. 2012. Negative results are disappearing from most disciplines and countries. *Scientometrics*.  
6 1347 90(3): 891-904. <https://doi.org/10.1007/s11192-011-0494-7>
- 7 1348 Farris, J.L. and J.H.V. Hassel, editors. 2006. *Freshwater Bivalve Ecotoxicology*. SETAC and CRC Press,  
8 1349 408 pp
- 9 1350 Fellner, C. 2018. Toxic Secrets: Professor ‘bragged about burying bad science’ on 3M chemicals (18 June  
10 1351 2018). Sydney Morning Herald.
- 11 1352 Fenn, D.B. and N.M. Milton. 1997. Advocacy and the Scientist. *Fisheries*. 22(11): 4
- 12 1353 Flamini, F., N. Hanley, and W.D. Shaw. 2004. Settlement versus Litigation in Environmental Damage  
13 1354 Cases. Working Paper. Business School - Economics, University of Glasgow.  
14 1355 [http://EconPapers.repec.org/RePEc:gl:glawp:2003\\_4](http://EconPapers.repec.org/RePEc:gl:glawp:2003_4).
- 15 1356 Folta, K.M., 2015, Transparency Weaponized Against Scientists (August 16, 2015): Science 2.0, at  
16 1357 [http://www.science20.com/kevin\\_folta/transparency\\_weaponized\\_against\\_scientists-156873](http://www.science20.com/kevin_folta/transparency_weaponized_against_scientists-156873).
- 17 1358 Fraser, H., T.H. Parker, S. Nakagawa, A. Barnett, and F. Fidler. 2018. Questionable Research Practices in  
18 1359 Ecology and Evolution. *PLoS ONE*. <https://doi.org/10.1371/journal.pone.0200303>
- 19 1360 Gardner, M. 1989. Water with memory? The dilution affair. *The Skeptical Inquirer*. 13: 132-141
- 20 1361 Geist, D.R., C.S. Abernethy, K.D. Hand, V.I. Cullinan, J.A. Chandler, and P.A. Groves. 2006. Survival,  
21 1362 development, and growth of fall Chinook salmon embryos, alevin, and fry exposed to a variable  
22 1363 thermal and dissolved oxygen regime. *Transactions of the American Fisheries Society*. 135(6):  
23 1364 1462–1477. <https://doi.org/10.1577/T05-294.1>
- 24 1365 Ghorayshi, A. 2016. "He thinks he's untouchable"-Sexual Harassment Case Exposes Renowned Ebola  
25 1366 Scientist (June 29, 2016). BuzzFeedNews. [https://www.buzzfeed.com/azeenghorayshi/michael-](https://www.buzzfeed.com/azeenghorayshi/michael-katze-investigation)  
26 1367 [katze-investigation](https://www.buzzfeed.com/azeenghorayshi/michael-katze-investigation).
- 27 1368 Gibbons, A. 2014. Sexual harassment is common in scientific fieldwork (July 16, 2014). *Science*.
- 28 1369 Glanz, J. and A. Armendariz, 2017, Years of Ethics Charges, but Star Cancer Researcher Gets a Pass  
29 1370 (March 8, 2017): New York Times, at [https://www.nytimes.com/2017/03/08/science/cancer-](https://www.nytimes.com/2017/03/08/science/cancer-carlo-croce.html)  
30 1371 [carlo-croce.html](https://www.nytimes.com/2017/03/08/science/cancer-carlo-croce.html).
- 31 1372 Gleick, P.H. and 252 co-authors. 2010. Climate Change and the Integrity of Science. *Science*. 328(5979):  
32 1373 689-690. <https://doi.org/10.1126/science.328.5979.689>
- 33 1374 Goldsmith, B.J., T.K. Waikem, and T. Franey. 2014. Environmental Damage Liability Regimes  
34 1375 Concerning Oil Spills - A Global Review and Comparison. *International Oil Spill Conference*  
35 1376 *Proceedings*. 2014(1): 2172-2192. <https://doi.org/10.7901/2169-3358-2014.1.2172>
- 36 1377 Goodstein, D. 1995. Conduct and Misconduct in Science. *Annals of the New York Academy of Sciences*.  
37 1378 775(1): 31-38. <https://doi.org/10.1111/j.1749-6632.1996.tb23124.x>
- 38 1379 Gustavson, K.E., L.W. Barnhouse, C.L. Brierley, E.H. Clark, II, and C.H. Ward. 2007. Superfund and  
39 1380 mining megasites. *Environmental Science and Technology*. 41(8): 2667-2672.  
40 1381 <https://doi.org/10.1021/es0725091>
- 41 1382 Halpern, M. 2015. Freedom to Bully: How Laws Intended to Free Information Are Used to Harass  
42 1383 Researchers (2015). Union of Concerned Scientists. 20 pp. [https://www.ucsusa.org/center-](https://www.ucsusa.org/center-science-and-democracy/protecting-scientists-harassment/freedom-bully-how-laws)  
43 1384 [science-and-democracy/protecting-scientists-harassment/freedom-bully-how-laws](https://www.ucsusa.org/center-science-and-democracy/protecting-scientists-harassment/freedom-bully-how-laws).
- 44 1385 Halpern, M. and M. Mann. 2015. Transparency versus harassment. *Science*. 348(6234): 479-479.  
45 1386 <https://doi.org/10.1126/science.aac4245>
- 46 1387 Hannah, R., V.J. D'Aco, P.D. Anderson, M.E. Buzby, D.J. Caldwell, V.L. Cunningham, J.F. Ericson,  
47 1388 A.C. Johnson, N.J. Parke, J.H. Samuelian, and J.P. Sumpter. 2009. Exposure assessment of 17 $\alpha$ -  
48 1389 ethinylestradiol in surface waters of the United States and Europe. *Environmental Toxicology and*  
49 1390 *Chemistry*. 28(12): 2725-2732. <https://doi.org/10.1897/08-622.1>
- 50 1391 Hanson, M.L., L.E. Deeth, and R.S. Prosser. 2018. Evidence of citation bias in the pesticide  
51 1392 ecotoxicology literature. *Ecotoxicology*. <https://doi.org/10.1007/s10646-018-1918-4>
- 52  
53  
54  
55  
56  
57  
58  
59  
60

- 1  
2  
3 1393 Hanson, M.L., B.A. Wolff, J.W. Green, M. Kivi, G.H. Panter, M.S.J. Warne, M. Ågerstrand, and J.P.  
4 1394 Sumpter. 2017. How we can make ecotoxicology more valuable to environmental protection.  
5 1395 *Science of the Total Environment*. 578: 228-235. <https://doi.org/10.1016/j.scitotenv.2016.07.160>  
6 1396 Harris, C.A., A.P. Scott, A.C. Johnson, G.H. Panter, D. Sheahan, M. Roberts, and J.P. Sumpter. 2014.  
7 1397 Principles of Sound Ecotoxicology. *Environmental Science & Technology*. 48(6): 3100-3111.  
8 1398 <https://doi.org/10.1021/es4047507>  
9 1399 Harris, C.A. and J.P. Sumpter. 2015. Could the Quality of Published Ecotoxicological Research Be  
10 1400 Better? *Environmental Science & Technology*. 49(16): 9495-9496.  
11 1401 <https://doi.org/10.1021/acs.est.5b01465>  
12 1402 Harris, D. and M. Patrick, 2011, Is 'Big Food's' Big Money Influencing the Science of Nutrition? (June  
13 1403 21,2011): ABC News, at [http://abcnews.go.com/US/big-food-money-accused-influencing-](http://abcnews.go.com/US/big-food-money-accused-influencing-science/story?id=13845186)  
14 1404 [science/story?id=13845186](http://abcnews.go.com/US/big-food-money-accused-influencing-science/story?id=13845186).  
15 1405 Harris, M.J., D.B. Huggett, J.P. Staveley, and J.P. Sumpter. 2017. What training and skills will the  
16 1406 ecotoxicologists of the future require? *Integrated Environmental Assessment and Management*.  
17 1407 13(4): 580-584. <https://doi.org/10.1002/ieam.1877>  
18 1408 Hayes, T.B. 2004. There Is No Denying This: Defusing the Confusion about Atrazine. *BioScience*.  
19 1409 54(12): 1138-1149. [https://doi.org/10.1641/0006-3568\(2004\)054\[1138:TINDTD\]2.0.CO;2](https://doi.org/10.1641/0006-3568(2004)054[1138:TINDTD]2.0.CO;2)  
20 1410 Henderson, D. and K. Thomson. 2017. Why Should Scientific Results Be Reproducible? (NOVA,  
21 1411 WGBH, 15 minute video, released 19 January 2017). WGBH, NOVA.  
22 1412 <http://www.pbs.org/wgbh/nova/next/body/reproducibility-explainer/>.  
23 1413 Hey, E. and I. Chalmers. 2010. Mis-investigating alleged research misconduct can cause widespread,  
24 1414 unpredictable damage. *Journal of the Royal Society of Medicine*. 103(4): 133-138.  
25 1415 <https://doi.org/10.1258/jrsm.2010.09k045>  
26 1416 Hobbs, D.A., M.S.J. Warne, and S.J. Markich. 2005. Evaluation of criteria used to assess the quality of  
27 1417 aquatic toxicity data. *Integrated Environmental Assessment and Management*. 1(3): 174–180.  
28 1418 <https://doi.org/10.1897/2004-003R.1>  
29 1419 Holdren, J.P. 2013. Increasing Access to the Results of Federally Funded Scientific Research.  
30 1420 Memorandum for the heads of executive departments and agencies (February 22, 2013).  
31 1421 Executive Office of the President, Office of Science and Technology Policy. , Washington, D.C.  
32 1422 6 pp.  
33 1423 Hopkin, M. 2006. Ecology: Caught between shores. *Nature*. 440(7081): 144-145.  
34 1424 <https://doi.org/10.1038/440144a>  
35 1425 Horowitz, A.J. 2013. A Review of Selected Inorganic Surface Water Quality-Monitoring Practices: Are  
36 1426 We Really Measuring What We Think, and If So, Are We Doing It Right? *Environmental*  
37 1427 *Science & Technology*. 47(6): 2471-2486. <https://doi.org/10.1021/es304058q>  
38 1428 Huff, D. and I. Geis. 1954. How to lie with statistics. W.W. Norton, New York and London. (1993  
39 1429 reissue). 142 pp  
40 1430 Hurlbert, S.H. 1984. Pseudoreplication and the design of ecological field experiments. *Ecological*  
41 1431 *Monographs*. 54(2): 187-211. <https://doi.org/10.2307/1942661>  
42 1432 Hutchings, J.A. 1997. Is scientific inquiry incompatible with government information control? *Canadian*  
43 1433 *Journal of Fisheries and Aquatic Sciences*. 54(5): 1198-1210. <https://doi.org/10.1139/f97-051>  
44 1434 ICMJE. 2016. ICMJE Form for Disclosure of Potential Conflicts of Interest. International Committee of  
45 1435 Medical Journal Editors. 3 pp. <http://icmje.org/conflicts-of-interest/>.  
46 1436 Ioannidis, J.P.A. 2005. Why Most Published Research Findings Are False. *PLoS Med*. 2(8): e124.  
47 1437 <https://doi.org/10.1371/journal.pmed.0020124>  
48 1438 Johnson, A.C., R.L. Donnachie, J.P. Sumpter, M.D. Jürgens, C. Moeckel, and M.G. Pereira. 2017. An  
49 1439 alternative approach to risk rank chemicals on the threat they pose to the aquatic environment.  
50 1440 *Science of the Total Environment*. 599-600: 1372-1381.  
51 1441 <https://doi.org/10.1016/j.scitotenv.2017.05.039>  
52  
53  
54  
55  
56  
57  
58  
59  
60

- 1  
2  
3 1442 Johnson, A.C. and J.P. Sumpter. 2016. Are we going about chemical risk assessment for the aquatic  
4 1443 environment the wrong way? *Environmental Toxicology and Chemistry*. 35(7): 1609-1616.  
5 1444 <https://doi.org/10.1002/etc.3441>
- 6 1445 Johnson, B.L. 2007. Intimidation of Scientists: A HERA Experience. *Human and Ecological Risk*  
7 1446 *Assessment: An International Journal*. 13(3): 475-477.  
8 1447 <https://doi.org/10.1080/10807030701340870>
- 9 1448 Johnson, D.R. and E.H. Ecklund. 2016. Ethical ambiguity in science. *Science and Engineering Ethics*.  
10 1449 22(4): 989-1005. <https://doi.org/10.1007/s11948-015-9682-9>
- 11 1450 Kapustka, L. 2016. Words matter. *Integrated Environmental Assessment and Management*. 12(3): 592-  
12 1451 593. <https://doi.org/10.1002/ieam.1767>
- 13 1452 Keith, R., 2015, 13th retraction issued for Jesús Ángel Lemus (October 9, 2015), *Retraction Watch* at  
14 1453 <http://retractionwatch.com/2015/10/09/13th-retraction-issued-for-jesus-angel-lemus/>.
- 15 1454 Kidwell, M.C., L.B. Lazarević, E. Baranski, T.E. Hardwicke, S. Piechowski, L.-S. Falkenberg, C.  
16 1455 Kennett, A. Slowik, C. Sonnleitner, C. Hess-Holden, T.M. Errington, S. Fiedler, and B.A. Nosek.  
17 1456 2016. Badges to Acknowledge Open Practices: A Simple, Low-Cost, Effective Method for  
18 1457 Increasing Transparency. *PLOS Biology*. 14(5): e1002456.  
19 1458 <https://doi.org/10.1371/journal.pbio.1002456>
- 20 1459 Kloor, K. 2015. Agricultural researchers rattled by demands for documents from group opposed to GM  
21 1460 foods. *Science Insider*. . <https://doi.org/10.1126/science.aaa7846>
- 22 1461 Kollipara, P. 2015. Open records laws becoming vehicle for harassing academic researchers, report warns  
23 1462 (Feb. 13, 2015). *Science*. <https://doi.org/10.1126/science.aaa7856>
- 24 1463 Kolpin, D.W., E.T. Furlong, M.T. Meyer, E.M. Thurman, S.D. Zaugg, L.B. Barber, and H.T. Buxton.  
25 1464 2002a. Pharmaceuticals, hormones, and other organic wastewater contaminants in U.S. streams,  
26 1465 1999-2000: a national reconnaissance. *Environmental Science and Technology*. 36(6): 1202-1211.  
27 1466 <https://doi.org/10.1021/es011055j>
- 28 1467 Kolpin, D.W., E.T. Furlong, M.T. Meyer, E.M. Thurman, S.D. Zaugg, L.B. Barber, and H.T. Buxton.  
29 1468 2002b. Response to Comment on “Pharmaceuticals, Hormones, and Other Organic Wastewater  
30 1469 Contaminants in U.S. Streams, 1999–2000: A National Reconnaissance”. *Environmental Science*  
31 1470 *& Technology*. 36(18): 4007-4008. <https://doi.org/10.1021/es020136s>
- 32 1471 Krinsky, S. 2003. *Science in the Private Interest: Has the Lure of Profits Corrupted Biomedical*  
33 1472 *Research?* Bowman and Littlefield Publishers. 265 pp
- 34 1473 Krinsky, S. 2005. The Funding Effect in Science and Its Implications for the Judiciary. *Journal of Law*  
35 1474 *and Policy*. 13(1): 43-68
- 36 1475 Krinsky, S. 2007. When Conflict-of-Interest Is a Factor in Scientific Misconduct. *Medicine and Law*.  
37 1476 26(3): 447-463
- 38 1477 Krinsky, S. 2013. Do financial conflicts of interest bias research?: An inquiry into the “funding effect”  
39 1478 hypothesis. *Science, Technology, & Human Values*. 38(4): 566-587.  
40 1479 <https://doi.org/10.1177/0162243912456271>
- 41 1480 Krumholz, H.M., J.S. Ross, A.H. Presler, and D.S. Egilman. 2007. What have we learnt from Vioxx?  
42 1481 *BMJ : British Medical Journal*. 334(7585): 120-123.  
43 1482 <https://doi.org/10.1136/bmj.39024.487720.68>
- 44 1483 Lackey, R.T. 2001. Values, Policy, and Ecosystem Health. *BioScience*. 51(6): 437-443.  
45 1484 [https://doi.org/10.1641/0006-3568\(2001\)051\[0437:VPAEH\]2.0.CO;2](https://doi.org/10.1641/0006-3568(2001)051[0437:VPAEH]2.0.CO;2)
- 46 1485 Lackey, R.T. 2007. Science, scientists, and policy advocacy. *Conservation Biology*. 21(1): 12-17.  
47 1486 <https://doi.org/10.1111/j.1523-1739.2006.00639.x>
- 48 1487 Laine, H. 2017. Afraid of Scooping; Case Study on Researcher Strategies against Fear of Scooping in the  
49 1488 Context of Open Science. *Data Science Journal*. 16: 29. <https://doi.org/10.5334/dsj-2017-029>
- 50 1489 Levy, K.E. and D.M. Johns. 2016. When open data is a Trojan Horse: The weaponization of transparency  
51 1490 in science and governance. *Big Data & Society*. 3(1). <https://doi.org/10.1177/2053951715621568>
- 52 1491 Lewandowsky, S. and D. Bishop. 2016. Research integrity: Don't let transparency damage science.  
53 1492 *Nature*. 529: 459-461. <https://doi.org/10.1038/529459a>
- 54  
55  
56  
57  
58  
59  
60

- 1  
2  
3 1493 Lexchin, J., L.A. Bero, B. Djulbegovic, and O. Clark. 2003. Pharmaceutical industry sponsorship and  
4 1494 research outcome and quality: systematic review. *BMJ*. 326(7400): 1167-1170.  
5 1495 <https://doi.org/10.1136/bmj.326.7400.1167>  
6 1496 Lindenmayer, D.B. and G.E. Likens. 2010. The science and application of ecological monitoring.  
7 1497 *Biological Conservation*. 143(6): 1317-1328. <https://doi.org/10.1016/j.biocon.2010.02.013>  
8 1498 Macleod, M. 2014. Some salt with your statin, Professor? *PLOS Biology*. 12(1): e1001768.  
9 1499 <https://doi.org/10.1371/journal.pbio.1001768>  
10 1500 Mandrioli, D., C.E. Kearns, and L.A. Bero. 2016. Relationship between Research Outcomes and Risk of  
11 1501 Bias, Study Sponsorship, and Author Financial Conflicts of Interest in Reviews of the Effects of  
12 1502 Artificially Sweetened Beverages on Weight Outcomes: A Systematic Review of Reviews. *PLoS*  
13 1503 *ONE*. 11(9): e0162198. <https://doi.org/10.1371/journal.pone.0162198>  
14 1504 Marcus, A. and I. Oransky. 2016. CRISPR controversy reveals how badly journals handle conflicts of  
15 1505 interest (January 21, 2016). *STAT*. [https://www.statnews.com/2016/01/21/crispr-conflicts-of-](https://www.statnews.com/2016/01/21/crispr-conflicts-of-interest/)  
16 1506 [interest/](https://www.statnews.com/2016/01/21/crispr-conflicts-of-interest/)  
17 1507 Marshall, E. 1983. The murky world of toxicity testing. *Science*. 220(4602): 1130-1132.  
18 1508 <https://doi.org/10.1126/science.6857237>  
19 1509 Martinson, B.C., M.S. Anderson, and R. de Vries. 2005. Scientists behaving badly. *Nature*. 435(7043):  
20 1510 737-738. <https://doi.org/10.1038/435737a>  
21 1511 McClellan, F. 2008. The Vioxx Litigation: A Critical Look at Trial Tactics, the Tort System, and the  
22 1512 Roles of Lawyers in Mass Tort Litigation. *DePaul Law Review*. 57: 509–538  
23 1513 McGarity, T.O. 2003. Our Science Is Sound Science and Their Science Is Junk Science: Science-Based  
24 1514 Strategies for Avoiding Accountability and Responsibility for Risk-Producing Products and  
25 1515 Activities. *Kansas Law Review*. 897-937  
26 1516 McGarity, T.O. and W.E. Wagner. 2008. Bending Science: How Special Interests Corrupt Public Health  
27 1517 Research. Harvard University Press, Cambridge, MA  
28 1518 McKinley, J. 2016. G.E. Spent Years Cleaning Up the Hudson. Was It Enough? , New York Times.  
29 1519 <https://www.nytimes.com/2016/09/09/nyregion/general-electric-pcbs-hudson-river.html>.  
30 1520 McNutt, M. 2016. #IAmAResearchParasite. *Science*. 351(6277): 1005-1005.  
31 1521 <https://doi.org/10.1126/science.aaf4701>  
32 1522 McNutt, M., K. Lehnert, B. Hanson, B.A. Nosek, A.M. Ellison, and J.L. King. 2016. Liberating field  
33 1523 science samples and data. *Science*. 351(6277): 1024-1026.  
34 1524 <https://doi.org/10.1126/science.aad7048>  
35 1525 Mebane, C.A., R.J. Eakins, B.G. Fraser, and W.J. Adams. 2015. Recovery of a mining-damaged stream  
36 1526 ecosystem. *Elementa: Science of the Anthropocene*. 3(1): 000042.  
37 1527 <https://doi.org/10.12952/journal.elementa.000042>  
38 1528 Mebane, C.A. and J.S. Meyer. 2016. Environmental Toxicology without Chemistry and Publications  
39 1529 without Discourse: Linked Impediments to Better Science. *Environmental Toxicology and*  
40 1530 *Chemistry*. 35(6): 1335–1336. <https://doi.org/10.1002/etc.3418>  
41 1531 Melvin, S.D., K.R. Munkittrick, T. Bosker, and D.L. MacLachy. 2009. Detectable effect size and  
42 1532 bioassay power of mummichog (*Fundulus heteroclitus*) and fathead minnow (*Pimephales*  
43 1533 *promelas*) adult reproductive tests. *Environmental Toxicology and Chemistry*. 28(11): 2416–  
44 1534 2425. <https://doi.org/10.1897/08-601.1>  
45 1535 Menzie, C. and R. Smith. 2018. Scientific Integrity Must Rise Above Partisanship (9 August 2018).  
46 1536 SETAC Globe. <https://globe.setac.org/scientific-integrity-must-rise-above-partisanship/>.  
47 1537 Meyer, J.L., P.C. Frumhoff, S.P. Hamburg, and C. de la Rosa. 2010. Above the din but in the fray:  
48 1538 environmental scientists as effective advocates. *Frontiers in Ecology and the Environment*. 8(6):  
49 1539 299-305. <https://doi.org/10.1890/090143>  
50 1540 Meyer, J.N. and A.B. Francisco. 2013. A call for fuller reporting of toxicity test data. *Integrated*  
51 1541 *Environmental Assessment and Management*. 9(2): 347-348. <https://doi.org/10.1002/ieam.1406>  
52 1542 Michaels, D. 2008. Doubt is Their Product: How Industry's Assault on Science Threatens Your Health.  
53 1543 Oxford University Press. 384 pp

- 1  
2  
3 1544 Moermond, C.T.A., R. Kase, M. Korkaric, and M. Ågerstrand. 2016. CRED: Criteria for reporting and  
4 1545 evaluating ecotoxicity data. *Environmental Toxicology and Chemistry*. 35(5): 1297-1309.  
5 1546 <https://doi.org/10.1002/etc.3259>  
6 1547 Mozur, M.C. 2012. A global professional society. *Integrated Environmental Assessment and*  
7 1548 *Management*. 8(1): 1-1. <https://doi.org/10.1002/ieam.1270>  
8 1549 Mudge, J.F., T.J. Barrett, K.R. Munkittrick, and J.E. Houlahan. 2012. Negative Consequences of Using  $\alpha$   
9 1550 = 0.05 for Environmental Monitoring Decisions: A Case Study from a Decade of Canada's  
10 1551 Environmental Effects Monitoring Program. *Environmental Science & Technology*. 46(17): 9249-  
11 1552 9255. <https://doi.org/10.1021/es301320n>  
12 1553 Munkittrick, K.R., C.J. Arens, R.B. Lowell, and G.P. Kaminski. 2009. A review of potential methods for  
13 1554 determining critical effect size for designing environmental monitoring programs. *Environmental*  
14 1555 *Toxicology and Chemistry*. 28(7): 1361-1371. <https://doi.org/10.1897/08-376.1>  
15 1556 Muscat, J.E. and M.S. Huncharek. 2008. Perineal Talc Use and Ovarian Cancer: A Critical Review.  
16 1557 *European journal of cancer prevention*. 17(2): 139-146.  
17 1558 <https://doi.org/10.1097/CEJ.0b013e32811080ef>  
18 1559 NAS. 1992. Responsible Science: Ensuring the Integrity of the Research Process. National Academy of  
19 1560 Sciences, National Academy Press, Washington, D.C. <https://doi.org/10.17226/1864>.  
20 1561 NAS. 2017. Fostering Integrity in Research. National Academy of Sciences, National Academy Press,  
21 1562 Washington, D.C. 284 pp. <https://doi.org/10.17226/21896>.  
22 1563 Nature Editors. 2014. Why high-profile journals have more retractions (17 September 2014). *Nature*.  
23 1564 <https://doi.org/10.1038/nature.2014.15951>  
24 1565 Nature Editors. 2018. Nature journals tighten rules on non-financial conflicts. *Nature*. 554(6).  
25 1566 <https://doi.org/10.1038/d41586-018-01420-8>  
26 1567 Nature Medicine Editors. 2017. Take science off the stand. *Nature Medicine*. 23(3): 265-265.  
27 1568 <https://doi.org/10.1038/nm.4303>  
28 1569 Nelson, B. 2009. Data sharing: Empty archives. *Nature*. 461: 160-163. <https://doi.org/10.1038/461160a>  
29 1570 Nelson, M.P. and J.A. Vucetich. 2009. On Advocacy by Environmental Scientists: What, Whether, Why,  
30 1571 and How. *Conservation Biology*. 23(5): 1090-1101. <https://doi.org/10.1111/j.1523-1739.2009.01250.x>  
31 1572  
32 1573 Nichols, T. 2017. The Death of Expertise: The Campaign Against Established Knowledge and Why it  
33 1574 Matters. Oxford University Press. 252 pp  
34 1575 Norton, S.B., S.M. Cormier, and G.W. Suter, II. 2002. The easiest person to fool. *Environmental*  
35 1576 *Toxicology and Chemistry*. 21(6): 1099-1100. <https://doi.org/10.1002/etc.5620210601>  
36 1577 Nosek, B.A. and 39 co-authors. 2015. Promoting an open research culture. *Science*. 348(6242): 1422-  
37 1578 1425. <https://doi.org/10.1126/science.aab2374>  
38 1579 Nosek, B.A. and T.M. Errington. 2017. Making sense of replications. *eLife*. 6: e23383.  
39 1580 <https://doi.org/10.7554/eLife.23383>  
40 1581 NRC-CNRC. 2013. NRC's Research Integrity Policy. National Research Council Canada. 28 pp.  
41 1582 [http://www.nrc-cnrc.gc.ca/eng/about/policies/research\\_integrity/](http://www.nrc-cnrc.gc.ca/eng/about/policies/research_integrity/).  
42 1583 NRC. 2002. Integrity in Scientific Research: Creating an Environment That Promotes Responsible  
43 1584 Conduct. National Research Council (US), National Academy Press, Washington, D.C.  
44 1585 Nuzzo, R. 2015. How scientists fool themselves – and how they can stop. *Nature*. 526: 182–185 (08  
45 1586 October 2015). <https://doi.org/10.1038/526182a>  
46 1587 Obama, B. 2009. Scientific Integrity (Presidential documents, Memorandum of March 9, 2009). *Federal*  
47 1588 *Register*. 74(46): 10671-10672  
48 1589 Ogden, L.E. 2016. Nine years of censorship. *Nature*. 533 26–28. <https://doi.org/10.1038/533026a>  
49 1590 Oreskes, N., D. Carlat, M.E. Mann, P.D. Thacker, and F.S. vom Saal. 2015. Viewpoint: Why Disclosure  
50 1591 Matters. *Environmental Science & Technology*. 49(13): 7527-7528.  
51 1592 <https://doi.org/10.1021/acs.est.5b02726>  
52 1593 Oreskes, N. and E.M. Conway. 2011. Merchants of doubt: How a Handful of Scientists Obscured the  
53 1594 Truth on Issues from Tobacco Smoke to Global Warming Bloomsbury Press. 355 pp  
54  
55  
56  
57  
58  
59  
60



- 1  
2  
3 1595 Owen, S.F., D.B. Huggett, T.H. Hutchinson, M.J. Hetheridge, P. McCormack, L.B. Kinter, J.F. Ericson,  
4 1596 L.A. Constantine, and J.P. Sumpter. 2010. The value of repeating studies and multiple controls:  
5 1597 replicated 28-day growth studies of rainbow trout exposed to clofibric acid. *Environmental*  
6 1598 *Toxicology and Chemistry*. 29(12): 2831-2839. <https://doi.org/10.1002/etc.351>
- 7 1599 Parker, K.R. and J.A. Wiens. 2005. Assessing recovery following environmental accidents: environmental  
8 1600 variation, ecological assumptions, and strategies. *Ecological Applications*. 15(6): 2037-2051.  
9 1601 <https://doi.org/10.1890/04-1723>
- 10 1602 Parker, T.H., W. Forstmeier, J. Koricheva, F. Fidler, J.D. Hadfield, Y.E. Chee, C.D. Kelly, J. Gurevitch,  
11 1603 and S. Nakagawa. 2016. Transparency in Ecology and Evolution: Real Problems, Real Solutions.  
12 1604 *Trends in Ecology & Evolution*. 31(9): 711-719. <https://doi.org/10.1016/j.tree.2016.07.002>
- 13 1605 Paul, A.P., J.R. Garbarino, L.D. Olsen, M.R. Rosen, C.A. Mebane, and T.M. Struzeski. 2016. Potential  
14 1606 sources of analytical bias and error in selected trace element data-quality analyses. U. S.  
15 1607 Geological Survey Scientific Investigations Report 2016-5135, Reston, VA. 68 pp.  
16 1608 <http://pubs.er.usgs.gov/publication/sir20165135>.
- 17 1609 Peterman, R.M. and M. M'Gonigle. 1992. Statistical power analysis and the precautionary principle.  
18 1610 *Marine Pollution Bulletin*. 24(5): 231-234. [https://doi.org/10.1016/0025-326X\(92\)90559-O](https://doi.org/10.1016/0025-326X(92)90559-O)
- 19 1611 Pielke, R.A., Jr. 2007. *The Honest Broker*. Cambridge University Press. 188 pp
- 20 1612 PLOS, 2014, Data Availability, accessed March 2, 2017 at [http://journals.plos.org/plosone/s/data-](http://journals.plos.org/plosone/s/data-availability)  
21 1613 [availability](http://journals.plos.org/plosone/s/data-availability).
- 22 1614 PLOS Medicine Editors. 2008. Making Sense of Non-Financial Competing Interests. *PLoS Med*. 5(9):  
23 1615 e199. <https://doi.org/10.1371/journal.pmed.0050199>
- 24 1616 Power, M., G. Power, and D.G. Dixon. 1995. Detection and decision-making in environmental effects  
25 1617 monitoring. *Environmental Management*. 19(5): 629-639. <https://doi.org/10.1007/BF02471945>
- 26 1618 Raloff, J. 2010. Atrazine paper's challenge: Who's responsible for accuracy? *Science News*. May 6, 2010
- 27 1619 Rekdal, O.B. 2014. Academic urban legends. *Social Studies of Science*. 44(4): 638-654.  
28 1620 <https://doi.org/10.1177/0306312714535679>
- 29 1621 Renner, R. 2005. Proposed selenium standard under attack. *Environmental Science & Technology*. 39(6):  
30 1622 125A-126A. <https://doi.org/10.1021/es053215n>
- 31 1623 Resnik, D.B., T. Neal, A. Raymond, and G.E. Kissling. 2015. Research Misconduct Definitions Adopted  
32 1624 by U.S. Research Institutions. *Accountability in Research*. 22(1): 14-21.  
33 1625 <https://doi.org/10.1080/08989621.2014.891943>
- 34 1626 Resnik, D.B. and A.E. Shamoo. 2011. The Singapore Statement on Research Integrity. *Accountability in*  
35 1627 *Research*. 18(2): 71-75. <https://doi.org/10.1080/08989621.2011.557296>
- 36 1628 Robbins, R. 2017. A supplement maker tried to silence this Harvard doctor — and put academic freedom  
37 1629 on trial (January 10, 2017). STAT. [https://www.statnews.com/2017/01/10/supplement-harvard-](https://www.statnews.com/2017/01/10/supplement-harvard-pieter-cohen/)  
38 1630 [pieter-cohen/](https://www.statnews.com/2017/01/10/supplement-harvard-pieter-cohen/).
- 39 1631 Roberts, P.D., G.B. Stewart, and A.S. Pullin. 2006. Are review articles a reliable source of evidence to  
40 1632 support conservation and environmental management? A comparison with medicine. *Biological*  
41 1633 *Conservation*. 132(4): 409-423. <https://doi.org/10.1016/j.biocon.2006.04.034>
- 42 1634 Rohr, J.R. and K.A. McCoy. 2010. Preserving environmental health and scientific credibility: a practical  
43 1635 guide to reducing conflicts of interest. *Conservation Letters*. 3(3): 143-150.  
44 1636 <https://doi.org/10.1111/j.1755-263X.2010.00114.x>
- 45 1637 Ross, T. 2017. Crime in the cancer lab (January 27, 2017). New York Times.  
46 1638 [https://www.nytimes.com/2017/01/28/opinion/sunday/a-crime-in-the-cancer-lab.html?\\_r=1](https://www.nytimes.com/2017/01/28/opinion/sunday/a-crime-in-the-cancer-lab.html?_r=1).
- 47 1639 Ruff, K. 2015. Scientific journals and conflict of interest disclosure: what progress has been made?  
48 1640 *Environmental Health*. 14(1): 1-8. <https://doi.org/10.1186/s12940-015-0035-6>
- 49 1641 Russell, M., G. Boulton, P. Clarke, D. Eyton, and J. Norton. 2010. The Independent Climate Change  
50 1642 Email Review. 160 pp. <http://www.cce-review.org/>.
- 51 1643 Santore, R.C., A.C. Ryan, F. Kroglund, H.C. Teien, P.H. Rodriguez, W.A. Stubblefield, A.S. Cardwell,  
52 1644 W.J. Adams, and E. Nordheim. 2018. Development and application of a Biotic Ligand Model for  
53  
54  
55  
56  
57  
58  
59  
60

- 1  
2  
3 1645 predicting the toxicity of dissolved and precipitated aluminum. *Environmental Toxicology and*  
4 1646 *Chemistry*. 37(1): 70-79. <https://doi.org/10.1002/etc.4020>
- 5 1647 Sass, J.B., B. Castleman, and D. Wallinga. 2005. Vinyl Chloride: A Case Study of Data Suppression and  
6 1648 Misrepresentation. *Environmental Health Perspectives*. 113(7): 809-812
- 7 1649 Schäfer, R.B., M. Bundschuh, A. Focks, and P.C. von der Ohe. 2013. To the Editor [authors should make  
8 1650 all their raw data accessible]. *Environmental Toxicology and Chemistry*. 32(4): 734-735.  
9 1651 <https://doi.org/10.1002/etc.2140>
- 10 1652 Schiermeier, Q. 2012. Arsenic-loving bacterium needs phosphorus after all. *Nature*.  
11 1653 <https://doi.org/10.1038/nature.2012.10971>
- 12 1654 Schindler, D.W. 1998. Replication versus realism: The need for ecosystem-scale experiments.  
13 1655 *Ecosystems*. 1(4): 323-334. <https://doi.org/10.1007/s100219900026>
- 14 1656 Scott, A.P. 2012. Do mollusks use vertebrate sex steroids as reproductive hormones? Part I: Critical  
15 1657 appraisal of the evidence for the presence, biosynthesis and uptake of steroids. *Steroids*. 77(13):  
16 1658 1450-1468. <https://doi.org/10.1016/j.steroids.2012.08.009>
- 17 1659 Scott, A.P. 2018. Is there any value in measuring vertebrate steroids in invertebrates? *General and*  
18 1660 *Comparative Endocrinology*. 265: 77-82. <https://doi.org/10.1016/j.ygcen.2018.04.005>
- 19 1661 Scott, J.M. and J.L. Rachlow. 2011. Refocusing the Debate about Advocacy. *Conservation Biology*.  
20 1662 25(1): 1-3. <https://doi.org/10.1111/j.1523-1739.2010.01629.x>
- 21 1663 Scott, J.M., J.L. Rachlow, R.T. Lackey, A.B. Pidgorna, J.L. Aycrigg, G.R. Feldman, L.K. Svancara, D.A.  
22 1664 Rupp, D.I. Stanish, and R.K. Steinhorst. 2007. Policy Advocacy in Science: Prevalence,  
23 1665 Perspectives, and Implications for Conservation Biologists. *Conservation Biology*. 21(1): 29-35.  
24 1666 <https://doi.org/10.1111/j.1523-1739.2006.00641.x>
- 25 1667 Sedlak, D. 2016. Crossing The Imaginary Line. *Environmental Science & Technology*. 50(18): 9803-  
26 1668 9804. <https://doi.org/10.1021/acs.est.6b04432>
- 27 1669 Shaw, D. and P. Satalkar. 2018. Researchers' interpretations of research integrity: A qualitative study.  
28 1670 *Accountability in Research*. 1-15. <https://doi.org/10.1080/08989621.2017.1413940>
- 29 1671 Shrader-Frechette, K. 2012. Research Integrity and Conflicts of Interest: The Case of Unethical Research-  
30 1672 Misconduct Charges Filed by Edward Calabrese. *Accountability in Research*. 19(4): 220-242.  
31 1673 <https://doi.org/10.1080/08989621.2012.700882>
- 32 1674 Skorupa, J.P., T.S. Presser, S.J. Hamilton, A.D. Lemly, and B.E. Sample. 2004. EPA's Draft Tissue-Based  
33 1675 Selenium Criterion: A Technical Review. U.S. Fish and Wildlife Service, U.S. Geological  
34 1676 Survey, U.S. Forest Service and CH2M Hill. 35 pp.  
35 1677 <https://wwwrcamnl.wr.usgs.gov/Selenium/library.htm>
- 36 1678 Smaldino, P.E. and R. McElreath. 2016. The natural selection of bad science. *Royal Society Open*  
37 1679 *Science*. 3(9). <https://doi.org/10.1098/rsos.160384>
- 38 1680 Smith, R. 2006. Conflicts of interest: how money clouds objectivity. *Journal of the Royal Society of*  
39 1681 *Medicine*. 99(6): 292-297
- 40 1682 Smith, R. and I. Roberts. 2016. Time for sharing data to become routine: the seven excuses for not doing  
41 1683 so are all invalid [version 1; referees: 2 approved, 1 approved with reservations]. *F1000Research*.  
42 1684 5(781). <https://doi.org/10.12688/f1000research.8422.1>
- 43 1685 Snyder, B.F. and L.M. Hooper-Bui. 2018. A Teachable Moment: The Relevance of Ethics and the Limits  
44 1686 of Science. *BioScience*. bix165-bix165. <https://doi.org/10.1093/biosci/bix165>
- 45 1687 Solomon, K.R., J.A. Carr, L.H. Du Preez, J.P. Giesy, R.J. Kendall, E.E. Smith, and G.J. Van Der Kraak.  
46 1688 2008. Effects of Atrazine on Fish, Amphibians, and Aquatic Reptiles: A Critical Review. *Critical*  
47 1689 *Reviews in Toxicology*. 38(9): 721-772. <https://doi.org/10.1080/10408440802116496>
- 48 1690 Sprague, L.A., G.P. Oelsner, and D.M. Argue. 2017. Challenges with secondary use of multi-source  
49 1691 water-quality data in the United States. *Water Research*. 110: 252-261.  
50 1692 <https://doi.org/10.1016/j.watres.2016.12.024>
- 51 1693 Stedeford, T. 2007. Prior restraint and censorship: acknowledged occupational hazards for government  
52 1694 scientists. *William and Mary Environmental Law and Policy Review*. 31(3): 725-745.

- 1  
2  
3 1695 Stein, R. and J. Eilperin. 2010. Obama administration issues guidelines designed to ensure 'scientific  
4 1696 integrity' (December 17, 2010). *Washington Post*.
- 5 1697 Steneck, N.H. 2006. Fostering integrity in research: Definitions, current knowledge, and future directions.  
6 1698 *Science and Engineering Ethics*. 12(1): 53-74. <https://doi.org/10.1007/PL00022268>
- 7 1699 Stern, V. 2017. Updated: Why would a university pay a scientist found guilty of misconduct to leave? (2  
8 1700 October 2017). *Science*. <https://doi.org/10.1126/science.aan7182>
- 9 1701 Stokstad, E. 2012. Fracking Report Criticized for Apparent Conflict of Interest (July 24, 2012). *Science*.  
10 1702 <http://www.sciencemag.org/news/2012/07/fracking-report-criticized-apparent-conflict-interest>.
- 11 1703 Sumner, P., S. Vivian-Griffiths, J. Boivin, A. Williams, C.A. Venetis, A. Davies, J. Ogden, L. Whelan, B.  
12 1704 Hughes, B. Dalton, F. Boy, and C.D. Chambers. 2014. The association between exaggeration in  
13 1705 health related science news and academic press releases: retrospective observational study. *BMJ* :  
14 1706 *British Medical Journal*. 349. <https://doi.org/10.1136/bmj.g7015>
- 15 1707 Sumpter, J.P., R.L. Donnachie, and A.C. Johnson. 2014. The apparently very variable potency of the anti-  
16 1708 depressant fluoxetine. *Aquatic Toxicology*. 151: 57-60.  
17 1709 <https://doi.org/10.1016/j.aquatox.2013.12.010>
- 18 1710 Sumpter, J.P., A.P. Scott, and I. Katsiadaki. 2016. Comments on Niemuth, N.J. and Klaper, R.D. 2015.  
19 1711 Emerging wastewater contaminant metformin causes intersex and reduced fecundity in fish.  
20 1712 *Chemosphere* 135, 38–45. *Chemosphere*. 165: 566-569.  
21 1713 <https://doi.org/10.1016/j.chemosphere.2016.08.049>
- 22 1714 Suter, G.W., II and S.M. Cormier. 2015a. Bias in the development of health and ecological assessments  
23 1715 and potential solutions. *Human and Ecological Risk Assessment*. 22(1): 99-115.  
24 1716 <https://doi.org/10.1080/10807039.2015.1056062>
- 25 1717 Suter, G.W., II and S.M. Cormier. 2015b. The Problem of Biased Data and Potential Solutions for Health  
26 1718 and Environmental Assessments. *Human and Ecological Risk Assessment*. 21(7): 1736-1752.  
27 1719 <https://doi.org/10.1080/10807039.2014.974499>
- 28 1720 Suter, G.W., II., S.B. Norton, and S.M. Cormier. 2002. A method for inferring the causes of observed  
29 1721 impairments in aquatic ecosystems. *Environmental Toxicology and Chemistry*. 21(6): 1101-1111.  
30 1722 <https://doi.org/10.1002/etc.5620210602>
- 31 1723 Tollefson, J. 2015. Earth science wrestles with conflict-of-interest policies. *Nature*. 522: 403-404.  
32 1724 <https://doi.org/10.1038/522403a>
- 33 1725 Topf, A., 2016, Imperial Metals sues engineering companies over Mount Polley disaster (July 10, 2016):  
34 1726 Mining.com, accessed February 7, 2017 at [http://www.mining.com/imperial-metals-sues-](http://www.mining.com/imperial-metals-sues-engineering-companies-mount-polley-disaster/)  
35 1727 [engineering-companies-mount-polley-disaster/](http://www.mining.com/imperial-metals-sues-engineering-companies-mount-polley-disaster/).
- 36 1728 U.S. Department of Interior, 2014, Code of Scientific and Scholarly Conduct (poster), at  
37 1729 [https://www.doi.gov/scientificintegrity/upload/DOI-Code-of-Scientific-and-Scholarly-Conduct-](https://www.doi.gov/scientificintegrity/upload/DOI-Code-of-Scientific-and-Scholarly-Conduct-Poster-December-2014.pdf)  
38 1730 [Poster-December-2014.pdf](https://www.doi.gov/scientificintegrity/upload/DOI-Code-of-Scientific-and-Scholarly-Conduct-Poster-December-2014.pdf).
- 39 1731 USEPA. 2013. Aquatic Life Ambient Water Quality Criteria For Ammonia – Freshwater 2013. EPA 822-  
40 1732 R-13-001. 255 pp.  
41 1733 <http://water.epa.gov/scitech/swguidance/standards/criteria/aqlife/ammonia/index.cfm>.
- 42 1734 van Iersel, S., E.M. Swart, Y. Nakadera, N.M. van Straalen, and J.M. Koene. 2014. Effect of Male  
43 1735 Accessory Gland Products on Egg Laying in Gastropod Molluscs. *Journal of Visualized*  
44 1736 *Experiments*. 88: e51698. <https://doi.org/10.3791/51698>
- 45 1737 Van Kirk, R.W. and S.L. Hill. 2007. Demographic model predicts trout population response to selenium  
46 1738 based on individual-level toxicity. *Ecological Modelling*. 206(3-4): 407-420.  
47 1739 <https://doi.org/10.1016/j.ecolmodel.2007.04.003>
- 48 1740 van Kolschooten, F. 2002. Conflicts of interest: Can you believe what you read? *Nature*. 416(6879): 360-  
49 1741 363
- 50 1742 Van Noorden, R. 2014. Publishers withdraw more than 120 gibberish papers (24 February 2014). *Nature*.  
51 1743 <https://doi.org/10.1038/nature.2014.14763>
- 52 1744 Vines, T.H., A.Y.K. Albert, R.L. Andrew, F. Débarre, D.G. Bock, M.T. Franklin, K.J. Gilbert, J.-S.  
53 1745 Moore, S. Renaut, and D.J. Rennison. 2014. The availability of research data declines rapidly

- 1  
2  
3 1746 with article age. *Current Biology*. 24(1): 94-97.  
4 1747 <https://doi.org/http://dx.doi.org/10.1016/j.cub.2013.11.014>  
5 1748 Wadman, M. 1997. \$100m payout after drug data withheld. *Nature*. 388(6644): 703-703  
6 1749 Wagner, W.E. 2005. The perils of relying on interested parties to evaluate scientific quality. *American*  
7 1750 *Journal of Public Health*. 95(S1): S99-S106. <https://doi.org/10.2105/AJPH.2004.044792>  
8 1751 Wagner, W.E. and D. Michaels. 2004. Equal Treatment for Regulatory Science: Extending the Controls  
9 1752 Governing the Quality of Public Research to Private Research. *American Journal of Law &*  
10 1753 *Medicine*. 30(2-3): 119-154. <https://doi.org/10.1177/009885880403000202>  
11 1754 Weltje, L. and J.P. Sumpter. 2017. What makes a concentration environmentally relevant? Critique and a  
12 1755 Proposal. *Environmental Science & Technology*. 51: 11520–11521.  
13 1756 <https://doi.org/10.1021/acs.est.7b04673>  
14 1757 Whaley, P., C. Halsall, M. Ågerstrand, E. Aiassa, D. Benford, G. Bilotta, D. Coggon, C. Collins, C.  
15 1758 Dempsey, R. Duarte-Davidson, R. FitzGerald, M. Galay-Burgos, D. Gee, S. Hoffmann, J. Lam,  
16 1759 T. Lasserson, L. Levy, S. Lipworth, S.M. Ross, O. Martin, C. Meads, M. Meyer-Baron, J. Miller,  
17 1760 C. Pease, A. Rooney, A. Sapiets, G. Stewart, and D. Taylor. 2016. Implementing systematic  
18 1761 review techniques in chemical risk assessment: Challenges, opportunities and recommendations.  
19 1762 *Environment International*. 92-93: 556-564. <https://doi.org/10.1016/j.envint.2015.11.002>  
20 1763 Wiens, J.A. and K.R. Parker. 1995. Analyzing the effects of accidental environmental impacts:  
21 1764 approaches and assumptions. *Ecological Applications*. 5(4): 1069-1083.  
22 1765 <https://doi.org/10.2307/2269355>  
23 1766 Wise, J. 1997. Research suppressed for seven years by drug company. *BMJ : British Medical Journal*.  
24 1767 314(7088): 1145-1145. <https://doi.org/10.1136/bmj.314.7088.1145>  
25 1768 Womack, R.P. 2015. Research Data in Core Journals in Biology, Chemistry, Mathematics, and Physics.  
26 1769 *PLoS ONE*. 10(12): e0143460. <https://doi.org/10.1371/journal.pone.0143460>  
27 1770 Young, N.S., J.P.A. Ioannidis, and O. Al-Ubaydli. 2008. Why Current Publication Practices May Distort  
28 1771 Science. *PLOS Medicine*. 5(10): e201. <https://doi.org/10.1371/journal.pmed.0050201>  
29  
30  
31 1772  
32  
33  
34  
35  
36  
37  
38  
39  
40  
41  
42  
43  
44  
45  
46  
47  
48  
49  
50  
51  
52  
53  
54  
55  
56  
57  
58  
59  
60

www.benitaepstein.com

© Benita Epstein

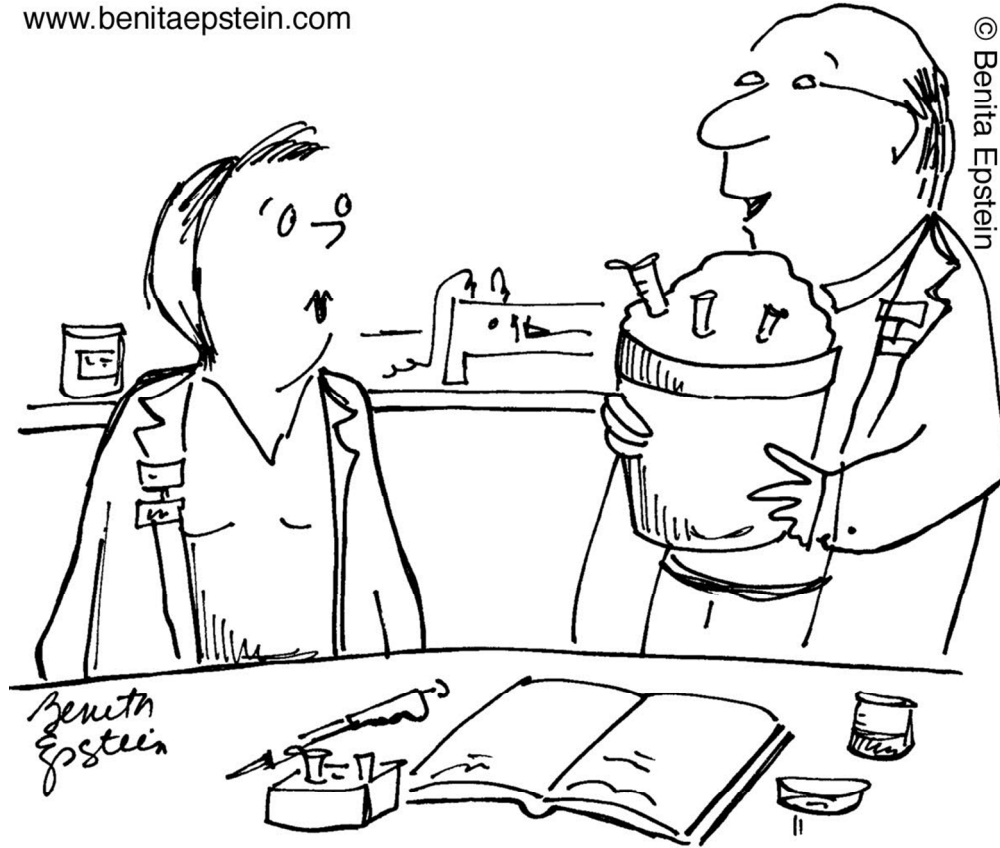

**“It’s only a conflict of interest  
if the data turns out good.”**

Figure 1. Conflicts of interest in science arise when secondary interests such as financial gain or maintaining professional relationships compromise the primary interest of upholding scientific norms such as the objective design, conduct, and interpretation of studies and the open sharing of scientific discoveries to advance our collective learning (© Benita Epstein, used with permission.)

423x417mm (72 x 72 DPI)

www.benitaepstein.com

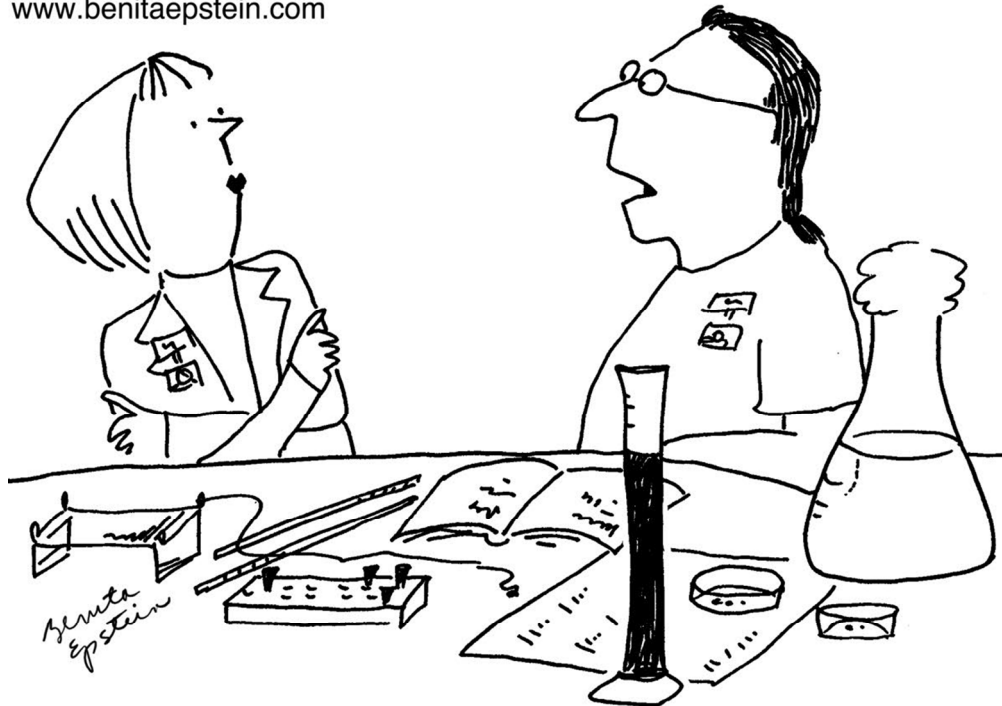

"I already wrote the paper. That's  
why it's so hard to get the right data."

Figure 2. Confirmation bias is the tendency to seek and interpret evidence in a way that confirms preexisting beliefs and gives less consideration to alternative hypotheses (© Benita Epstein, used with permission).

423x353mm (72 x 72 DPI)

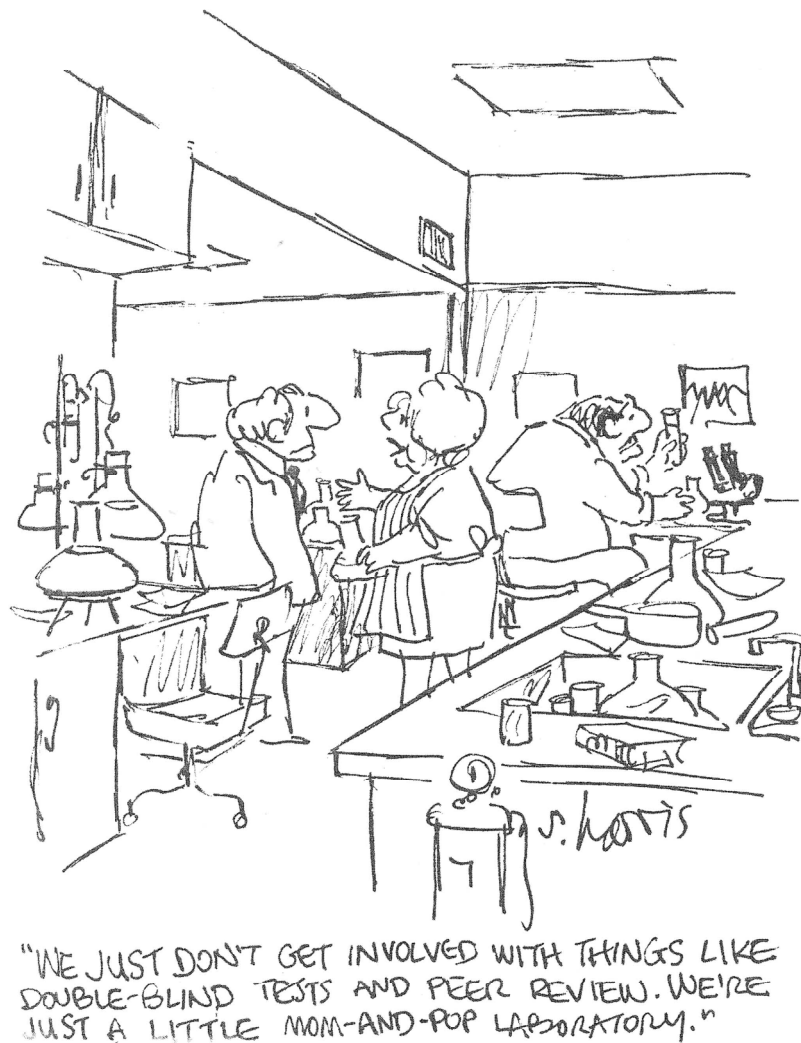

Figure 3. Large environmental chemistry and toxicology laboratories that use standard methods to produce results that may be submitted to regulatory agencies usually have a well-established quality management structure. Quality management in academic research laboratories focused on novel methods may be more ad hoc, especially if the research work force is dominated by transient scientists, such as students or those on short-term postgraduate appointments (Credit: S.Harris, sciencecartoonsplus.com).

216x240mm (300 x 300 DPI)

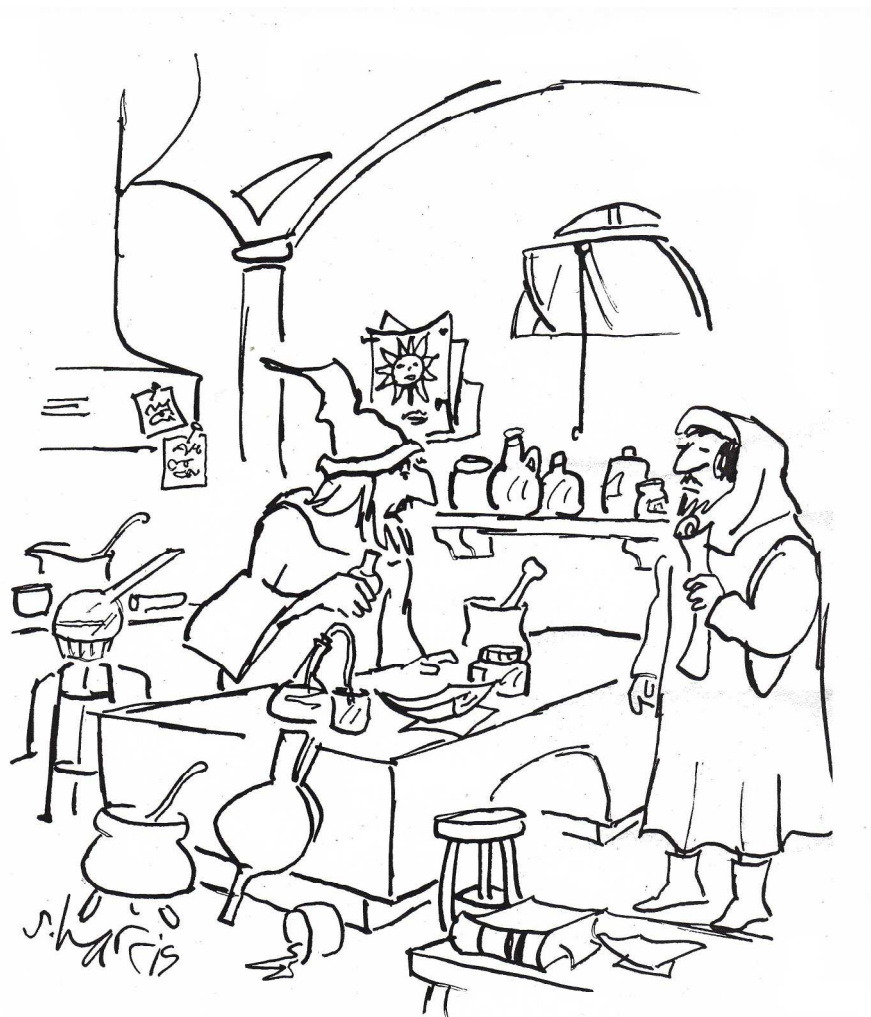

"OF COURSE YOU CAN'T REPLICATE MY EXPERIMENT.  
THERE'S A SECRET INCANTATION THAT YOU HAVE TO CHANT,  
AND I'M NOT TELLING IT TO ANYONE."

Figure 4. The brief methods descriptions in journal articles are seldom sufficient to be reproducible by others. Step-by-step video documentation of experimental protocols can be published as video articles, uploaded to online repositories, or published as supplemental information. Video protocols are underutilized in environmental toxicology (Credit: S. Harris, Sciencecartoonsplus.com).

184x242mm (300 x 300 DPI)



**Integrated Environmental  
Assessment and Management**

**Scientific Integrity Issues in Environmental Toxicology:  
improving research reproducibility, credibility, and  
transparency**

|                               |                                                                                                                                                                                                                                                                                                                                                                                                                                                                                                                                                                                                                                                                                                                                                                                                                                                                                                                                                                                                                                                                                                                                                            |
|-------------------------------|------------------------------------------------------------------------------------------------------------------------------------------------------------------------------------------------------------------------------------------------------------------------------------------------------------------------------------------------------------------------------------------------------------------------------------------------------------------------------------------------------------------------------------------------------------------------------------------------------------------------------------------------------------------------------------------------------------------------------------------------------------------------------------------------------------------------------------------------------------------------------------------------------------------------------------------------------------------------------------------------------------------------------------------------------------------------------------------------------------------------------------------------------------|
| Journal:                      | <i>Integrated Environmental Assessment and Management</i>                                                                                                                                                                                                                                                                                                                                                                                                                                                                                                                                                                                                                                                                                                                                                                                                                                                                                                                                                                                                                                                                                                  |
| Manuscript ID                 | IEAM-2018-029-CR                                                                                                                                                                                                                                                                                                                                                                                                                                                                                                                                                                                                                                                                                                                                                                                                                                                                                                                                                                                                                                                                                                                                           |
| Wiley - Manuscript type:      | Critical Review                                                                                                                                                                                                                                                                                                                                                                                                                                                                                                                                                                                                                                                                                                                                                                                                                                                                                                                                                                                                                                                                                                                                            |
| Date Submitted by the Author: | 27-Feb-2018                                                                                                                                                                                                                                                                                                                                                                                                                                                                                                                                                                                                                                                                                                                                                                                                                                                                                                                                                                                                                                                                                                                                                |
| Complete List of Authors:     | Mebane, Christopher; National Oceanic and Atmospheric Administration, Sumpster , John; Brunel University<br>Fairbrother, Anne; Exponent, EcoSciences<br>Augspurger, Tom; USFWS<br>Canfield, Timothy; US Environmental Protection Agency, National Risk Management Research Laboratory, Ground Water and Ecosystems Restoration Division<br>Goodfellow, William; Exponent Inc<br>Guiney, Pat; Guiney<br>LeHuray, Anne; Chemical Management Associates LLC<br>Maltby, Lorraine; University of Sheffield, Department of Animal and Plant Sciences<br>Mayfield, David; Gradient, Toxicology<br>Ortego, Lisa; Bayer CropScience LP<br>McLaughlin, Mike; CSIRO/University of Adelaide,<br>Schlekat, Tamar; Society of Environmental Toxicology and Chemistry<br>Scroggins, Rick; Environment Canada,<br>Verslycke, Tim; Gradient,                                                                                                                                                                                                                                                                                                                                |
| Keywords:                     | scientific integrity, reproducibility, bias, transparency                                                                                                                                                                                                                                                                                                                                                                                                                                                                                                                                                                                                                                                                                                                                                                                                                                                                                                                                                                                                                                                                                                  |
| Abstract:                     | High profile reports of detrimental scientific practices leading to retractions in the scientific literature contribute to lack of trust in scientific experts. While the bulk of these have been in the biomedical literature, environmental sciences and ecotoxicology are not excepted from questionable practices. While we believe that egregious misconduct such as fraud is rare and when uncovered is universally condemned, we are more concerned with more commonly encountered issues, such as poor reliability and bias. These issues may be nuanced, and require thoughtful consideration rather than condemnation. We review a range of topics including conflicts of interests, competing interests, particularly challenging situations, reproducibility, publication, and other biases, quality management and other attributes of ecotoxicological studies that enhance or detract from scientific credibility. We propose a conceptual framework for considering scientific integrity as an extension of personal integrity, encouraging a self-correcting culture of scientific rigor, appropriate transparency, and objective review. |

1  
2  
3  
4  
5  
6  
7  
8  
9  
10  
11  
12  
13  
14  
15  
16  
17  
18  
19  
20  
21  
22  
23  
24  
25  
26  
27  
28  
29  
30  
31  
32  
33  
34  
35  
36  
37  
38  
39  
40  
41  
42  
43  
44  
45  
46  
47  
48  
49  
50  
51  
52  
53  
54  
55  
56  
57  
58  
59  
60



SCHOLARONE™  
Manuscripts

According to USGS [Fundamental Science Practices](#), any manuscript that includes a USGS as a coauthor and circulated for peer review must carry the following statement: *“This draft manuscript is distributed solely for purposes of scientific peer review. Its content is deliberative and predecisional, so it must not be disclosed or released by reviewers. Because the manuscript has not yet been approved for publication by the U.S. Geological Survey (USGS), it does not represent any official USGS finding or policy.”*

## Scientific Integrity Issues in Environmental Toxicology: improving research reproducibility, credibility, and transparency

Christopher A. Mebane<sup>1</sup>, John P. Sumpter<sup>2</sup>, Anne Fairbrother<sup>3</sup>, Thomas P. Augspurger<sup>4</sup>, Timothy J. Canfield<sup>5</sup>, William L. Goodfellow<sup>6</sup>, Patrick D. Guiney<sup>7</sup>, Anne LeHuray<sup>8</sup>, Lorraine Maltby<sup>9</sup>, David B. Mayfield<sup>10</sup>, Michael J. McLaughlin<sup>11</sup>, Lisa Ortego<sup>12</sup>, Tamar Schlekot<sup>13</sup>, Richard P. Scroggins<sup>14</sup>, Tim A. Verslycke<sup>15</sup>

<sup>1</sup>U.S. Geological Survey, Boise, ID USA; <sup>2</sup>Brunel University London, UK; <sup>3</sup>Exponent Inc., Bellevue, WA, USA; <sup>4</sup>U.S. Fish and Wildlife Service, Raleigh, NC USA; <sup>5</sup>U.S. Environmental Protection Agency, Ada, OK USA; <sup>6</sup>Exponent Inc., Alexandria, VA USA; <sup>7</sup>University of Wisconsin, Madison, WI USA; <sup>8</sup>Chemical Management Associates LLC, Alexandria VA, USA; <sup>9</sup>University of Sheffield, Sheffield, UK; <sup>10</sup>Gradient, Seattle, WA, USA; <sup>11</sup>University of Adelaide, Adelaide, South Australia, Australia; <sup>12</sup>Bayer, Crop Science Division, Research Triangle Park, NC, USA; <sup>13</sup>SETAC, Pensacola, FL USA; <sup>14</sup>Environment and Climate Change Canada, Ottawa, ON, Canada; <sup>15</sup>Gradient, Cambridge, MA, USA

### Abstract

High profile reports of detrimental scientific practices leading to retractions in the scientific literature contribute to lack of trust in scientific experts. While the bulk of these have been in the biomedical literature, environmental sciences and ecotoxicology are not excepted from questionable practices. While we believe that egregious misconduct such as fraud is rare and when uncovered is universally condemned, we are more concerned with more commonly encountered issues, such as poor reliability and bias. These issues may be nuanced, and require thoughtful consideration rather than condemnation. We review a range of topics including

*Review draft – not for distribution or attribution*

1  
2  
3 23 conflicts of interests, competing interests, particularly challenging situations, reproducibility,  
4  
5 24 publication, and other biases, quality management and other attributes of ecotoxicological  
6  
7  
8 25 studies that enhance or detract from scientific credibility. We propose a conceptual framework  
9  
10 26 for considering scientific integrity as an extension of personal integrity, encouraging a self-  
11  
12 27 correcting culture of scientific rigor, appropriate transparency, and objective review.  
13  
14  
15

## 16 28 **Introduction**

17  
18 29 Highly polarized recent elections in Europe and North America have shown that large  
19  
20 30 segments of society are distrustful of scientific and other experts. Some have suggested that we  
21  
22 31 are in a post-modern public culture in which reality is defined by the observer and objective facts  
23  
24 32 do not change peoples' minds, and those that conflict with one's beliefs are justifiably  
25  
26 33 questionable (Campbell and Friesen 2015). Science and scientists have been central to these  
27  
28 34 debates, and the boundaries of science, policy and politics may be indistinct. In a social climate  
29  
30 35 skeptical of science, the easy availability of numerous reports of dubious scientific practices  
31  
32 36 gives fodder to skeptics. Because environmental regulations on use of chemicals and waste  
33  
34 37 management rely heavily on the disciplines of ecotoxicology and chemistry, the integrity of the  
35  
36 38 science is of utmost importance. Here we discuss scientific integrity in the applied environmental  
37  
38 39 sciences, with a focus on ecotoxicology and how the role and culture of the Society of  
39  
40 40 Environmental Toxicology and Chemistry (SETAC) may influence such issues.  
41  
42  
43  
44  
45  
46

47 41 Science has long endured questionable science practices and a skeptical public. Socrates is  
48  
49 42 remembered as an early proponent of evidence-based inquiry but who suffered career-ending bad  
50  
51 43 reviews from his peers. Galileo's criticisms of prevailing beliefs resulted in his issuing a public  
52  
53 44 retraction of his seminal work. In contrast, science "discoveries" such as Piltdown Man, canals  
54  
55 45 on Mars, cold fusion, Archaeoraptor, arsenic-life, and many others have not stood the test of  
56  
57  
58  
59  
60

*Review draft – not for distribution or attribution*

1  
2  
3 46 time. By 1954, Huff and Geist (1954) illustrated how the presentation of scientific data could be  
4  
5 47 manipulated to become completely misleading yet accurate. Are things worse now? Recent  
6  
7 48 articles in both the scientific literature and popular print and broadcast venues paint a bleak  
8  
9  
10 49 picture of the status of science. One does not have to search hard to find plenty of published  
11  
12 50 concerns about the credibility of science. These include overstated and unreliable results (Harris  
13  
14 51 and Sumpter 2015; Henderson and Thomson 2017; Ioannidis 2005), conflicts of interest (Boone  
15  
16 52 et al. 2014; McGarity and Wagner 2012; Oreskes et al. 2015; Stokstad 2012; Tollefson 2015),  
17  
18 53 profound bias (Atkinson and Macdonald 2010; Bes-Rastrollo et al. 2014; Suter and Cormier  
19  
20 54 2015a, b), suppression of results to protect financial interests (Wadman 1997; Wise 1997),  
21  
22 55 deliberate misinformation campaigns as a public relations strategy for financial or ideological  
23  
24 56 aims (Baba et al. 2005; Gleick and 252 co-authors 2010; McGarity and Wagner 2012; Oreskes  
25  
26 57 and Conway 2010), political interference with or suppression of results from government  
27  
28 58 scientists (Hutchings 1997; Ogden 2016; Stedeford 2007), self-promotion and sabotage of rivals  
29  
30 59 in hypercompetitive settings (Edwards and Roy 2016; Martinson et al. 2005; Ross 2017),  
31  
32 60 publication bias, peer review and authorship games (Callaway 2015; Fanelli 2012; Young et al.  
33  
34 61 2008), overhyped institutional press releases that are incommensurate with the actual science  
35  
36 62 behind them (Cope and Allison 2009; Sumner et al. 2014), dodgy journals (Bohannon 2013),  
37  
38 63 dodgy conferences (Van Noorden 2014), and that beer both prevents and causes cancer (Oransky  
39  
40 64 2015)<sup>1</sup>.

41  
42  
43  
44  
45  
46  
47 65 Such published concerns reasonably raise doubts about science and scientists, and could even  
48  
49 66 lead some to conclude that the contemporary system of science is broken. In writing this  
50  
51 67 commentary, we attempt to address some prominent science integrity concerns in the context of  
52  
53

---

54  
55 <sup>1</sup> Throughout this commentary, citations are intended to be representative, without the “e.g.” qualifier, which would  
56 otherwise be needed in nearly every instance.  
57

*Review draft – not for distribution or attribution*

1  
2  
3 68 environmental toxicology. In our view, there is ample room for improvement within our  
4  
5 69 discipline, but environmental science is not broken and some criticisms are overstated. In writing  
6  
7 70 this commentary, we do not pretend to have some moral high ground that sets us apart from our  
8  
9 71 peers or arguments that will overturn insidious pressures on scientists and funders for impressive  
10  
11 72 results. Thus our recommendations are pragmatic, not dogmatic. Our goal is nudge practices and  
12  
13 73 pressures on scientists to advance the science, while maintain and improving credibility through  
14  
15 74 transparency, ongoing review, and self-correction.  
16  
17  
18  
19

20 75 Many of the prominent science integrity controversies have been in the high stakes  
21  
22 76 biomedical discipline, and in response that discipline probably has done more self-evaluation and  
23  
24 77 taken more steps toward best practices than most other disciplines. Results of self-reported,  
25  
26 78 anonymous surveys of scientists, mostly in the biomedical fields, have not been reassuring. In a  
27  
28 79 2002 survey of early and mid-career scientists, 0.3% admitted to falsification of data, 6% to a  
29  
30 80 failure to present conflicting evidence, and 16% to changing of study design, methodology or  
31  
32 81 results in response to funder pressure (Martinson et al. 2005). A subsequent meta-analysis of  
33  
34 82 surveys suggested problems were more common, with close to 2% of scientists admitting to  
35  
36 83 having been involved in serious misconduct, and over 70% reported they personally knew of  
37  
38 84 colleagues committing less severe detrimental research practices (Fanelli 2009). Serious  
39  
40 85 misconduct such as fraud can occur in ecotoxicology just as with any disciplines (Enserink 2017;  
41  
42 86 Keith 2015) and when exposed, is universally condemned and in most countries is career ending.  
43  
44 87 In contrast, the ambiguous, more nuanced issues of science integrity that all of us are likely to  
45  
46 88 experience in our careers require thoughtful consideration, not condemnation. It is toward the  
47  
48 89 latter that we discuss efforts toward remedies from other disciplines to examine similar issues in  
49  
50 90 ecotoxicology, focusing on SETAC.  
51  
52  
53  
54  
55  
56  
57  
58  
59  
60

*Review draft – not for distribution or attribution*

## 91 **What is “science” in the context of scientific integrity?**

92 Before we can discuss integrity in ecotoxicology and related environmental science fields, we  
93 must first distinguish what is meant by “science” in this context. Broadly speaking,  
94 environmental science includes the disciplines of biology, ecology, chemistry, physics, geology,  
95 limnology, mineralogy, marine studies, and atmospheric studies; i.e., the study of the natural  
96 world and its interconnections. The applications of environmental science extend to agriculture,  
97 fisheries management, forestry, natural resource conservation, and chemicals management, all of  
98 which have associated multi-billion dollar industries and vocal environmental advocacy groups.  
99 The subdiscipline of environmental toxicology or ecotoxicology, pursued by SETAC scientists,  
100 studies in great detail how the natural world is influenced by chemicals, both natural and  
101 synthetic, introduced by human endeavors that are largely in pursuit of the production of desired  
102 goods and services (food, clean water, plastic products, metals, etc.). Because exposure to  
103 chemicals can have negative and sometimes unexpected consequences for people and the  
104 environment, a body of regulation has developed over the past century to control the kinds and  
105 amounts of allowable chemical exposures. Such regulations necessarily are based on scientific  
106 concepts such as Paracelsus’ directive that “the dose makes the poison” (Kolok 2016) and  
107 physicochemical properties that influence transport and fate of substances. Because of the  
108 complexity, inexactitude, and uncertainty of ecotoxicology and associated sciences, rulemaking  
109 often is subject to challenge, leading to accusations of profit over people or the environment or  
110 unreasonably restrictive and burdensome requirements. Scientists are called upon to inform  
111 disputes based on their knowledge or underlying principals or enter the conversation through  
112 self-initiated in-depth literature review and commentary. While regulators and the public assume  
113 such scientific advice is unbiased and policy-neutral, there are concerns of science being

*Review draft – not for distribution or attribution*

1  
2  
3 114 normative with biased interpretations as scientists engage in controversial policy debates  
4  
5 115 (Lackey 2007). Only by conscientiously adhering to fundamental principles of the scientific  
6  
7  
8 116 method can environmental scientists maintain their integrity and continue to play a valid role in  
9  
10 117 environmental policy and management.

### 118 **What is “scientific integrity”?**

119 Impeccable honesty is a fundamental tenet of science. When we read a paper, we might not  
120 agree with the conclusions, authors’ interpretations of its implications, importance, or many  
121 other things, but we have to be confident that the procedures described were indeed followed and  
122 all relevant data were shown, not just those fitting the hypothesis. Goodstein (1995) put it well.  
123 *“There are, to be sure, minor deceptions in virtually all scientific papers, as there are in all other*  
124 *aspects of human life. For example, scientific papers typically describe investigations as they*  
125 *logically should have been done rather than as they actually were done. False steps, blind alleys*  
126 *and outright mistakes are usually omitted once the results are in and the whole experiment can*  
127 *be seen in proper perspective.”*

128 Various professional and governmental organizations have established policies and definitions  
129 prescribing research integrity, responsible conduct of science, or scientific integrity. These may  
130 include broad statements of attributes such as the U.S. National Academy of Science’s (NAS) six  
131 values that they considered most influential in shaping the norms that constitute research  
132 practices and relationships and the integrity of science: objectivity, honesty, openness,  
133 accountability, fairness, and stewardship (NAS 2017). More specific “research integrity”  
134 guidelines define appropriate expectations of individual researchers and their institutions and  
135 may be highly procedural. Protecting the privacy, rights and safety of human research  
136 participants and animal welfare with institutional review board clearance requirements is a



*Review draft – not for distribution or attribution*

1  
2  
3 137 common element of research integrity guidelines. Academic research integrity guidelines have  
4  
5 138 been established individually or in aggregate by research funders and individual institutions  
6  
7  
8 139 (ARC 2007; Goodstein 1995; NRC-CNRC 2013; NRC 2002; Resnik and Shamoo 2011; Steneck  
9  
10 140 2006). Research institutions are usually responsible for investigating potential breaches of  
11  
12 141 research integrity by its scientists, although this can create difficult conflicts of interest for the  
13  
14  
15 142 institution (Glanz and Armendariz 2017).

16  
17 143 Whether research integrity guidelines should best be defined narrowly or broadly has been an  
18  
19 144 area of controversy. As of 2015, 22 of the world’s top 40 research countries had national  
20  
21 145 research conduct policies, all of which included fabrication, falsification, and plagiarism (FFP),  
22  
23 146 with some going further. In this context, “fabrication” is making up data; “falsification” includes  
24  
25 147 manipulating studies or changing or omitting data such that the record does not accurately reflect  
26  
27 148 the actual research; and “plagiarism” includes the appropriation of another person’s ideas,  
28  
29 149 methods, results, or words without giving appropriate credit ([https://ori.hhs.gov/definition-](https://ori.hhs.gov/definition-misconduct)  
30  
31 [misconduct](https://ori.hhs.gov/definition-misconduct)). The Research Councils of the UK has a lengthy list of misdeeds including FFP,  
32  
33 150 misrepresentation, breach of duty of care, and improper dealing with allegations of misconduct,  
34  
35 151 with many subcategories (NAS 2017). In contrast, from the 1980s to 2000, the National Science  
36  
37 152 Foundation (US) had defined serious science misconduct broadly to include, “...*fabrication,*  
38  
39 153 *falsification, plagiarism, or other practices that seriously deviate from those that are commonly*  
40  
41 154 *accepted within the scientific community for proposing, conducting and reporting research*”  
42  
43 155 (Goodstein 1995). The controversial part was the catchall phrase “*practices that seriously*  
44  
45 156 *deviate from those commonly accepted...*” To the stewards of public science funds, such a  
46  
47 157 catchall phrase was preferable to an itemized lists of all potential avenues of mischief, yet it  
48  
49 158 raised the specter of penalizing scientists who strayed too far from orthodox thought (Goodstein  
50  
51  
52  
53  
54  
55  
56  
57  
58  
59  
60

*Review draft – not for distribution or attribution*

1  
2  
3 160 1995). In 2000, this definition of disbaring research misconduct was narrowed to just  
4  
5 161 “*fabrication, falsification, or plagiarism in proposing, performing, or reporting research*” with  
6  
7 162 lesser offenses classified as questionable research practices. Other misconduct was defined as  
8  
9 163 “*forms of unacceptable behavior that are clearly not unique to the conduct of science, although*  
10  
11 164 *they may occur in the laboratory or research environment.*” Yet only FFP research misconduct  
12  
13 165 findings were subject to reporting requirements to federal science funding agencies, with  
14  
15 166 questionable science practices or other misconduct handled locally (NAS 2017; Resnik et al.  
16  
17 167 2015). In many countries, there is an active debate about whether a legal definition is appropriate  
18  
19 168 for something that is really an academic judgment rather than a legal one. Denmark recently  
20  
21 169 similarly narrowed its broad definitions of research misconduct to only FFP following high  
22  
23 170 profile cases in which scientists succeeded in having their academic misconduct findings  
24  
25 171 overturned in the courts. Yet if research conduct policies are considered “academic” without  
26  
27 172 legal weight, institutions may have difficulty enforcing polices, such as when deliberate intent is  
28  
29 173 required to be shown and the researcher claims “honest mistake” .For instance, the U.S. Office of  
30  
31 174 Research Integrity found that a tenured professor had committed research misconduct by  
32  
33 175 inappropriately altering data in five images from three papers. Yet when the university sought to  
34  
35 176 terminate her, she fought back hiring a lawyer to contest the university’s procedures, and the  
36  
37 177 university ultimately paid her \$100,000 USD to leave (Stern 2017).

38  
39  
40  
41  
42  
43  
44  
45 178 Unfortunately, the “other misconduct” that scientists may commit can reflect that of any work  
46  
47 179 place, such as abuse of power; bullying, sexual coercion, assault, or harassment; misuse of funds;  
48  
49 180 sabotage; taking advantage of students or subordinates; specious whistleblowing; or retaliation  
50  
51 181 against valid whistleblowers; to name a few (e.g., Ghorayshi 2016; Gibbons 2014;  
52  
53 182 <http://retractionwatch.com>). The exclusion of such malfeasance from “research misconduct” has  
54  
55  
56  
57  
58  
59  
60

*Review draft – not for distribution or attribution*

1  
2  
3 183 been questioned. For example, a researcher who failed to meet her study objectives after being  
4  
5 184 sabotaged by a rival argued that she was further penalized by being instructed not to divulge the  
6  
7  
8 185 reason for her study failures to her funders (Enserink 2014). In contrast, institutions often do go  
9  
10 186 beyond the minimum “FFP” definition in their policies (Resnik et al. 2015), which has led to  
11  
12 187 objections of conflation of egregious misconduct such as fraud with failure to comply with  
13  
14  
15 188 administrative requirements that did not compromise data validity (Couzin-Frankel 2017).  
16

17 189 The U.S. National Academy of Science (NAS 2017) recently argued that the definitions of  
18  
19  
20 190 research misconduct as fabrication, falsification, or plagiarism were too narrow. In particular,  
21  
22 191 questionable research practices were more than just “questionable,” but were clear violations of  
23  
24 192 the fundamental tenets of research and were given a less ambiguous label of “detrimental.”  
25

26  
27 193 Consensus detrimental research practices were:  
28

- 29  
30 194 1. Detrimental authorship practices that may not be considered misconduct, such as  
31  
32 195 honorary authorship, demanding authorship in return for access to previously collected  
33  
34 196 data or materials, or denying authorship to those who deserve to be designated as  
35  
36 197 authors.  
37  
38  
39 198 2. Not retaining or making data, code, or other information/materials underlying research  
40  
41 199 results available as specified in institutional or sponsor policies, or standard practices  
42  
43  
44 200 in the field.  
45  
46  
47 201 3. Neglectful or exploitative supervision in research.  
48  
49 202 4. Misleading statistical analysis that falls short of falsification.  
50  
51  
52  
53  
54  
55  
56  
57  
58  
59  
60

*Review draft – not for distribution or attribution*

- 1  
2  
3 203 5. Inadequate institutional policies, procedures, or capacity to foster research integrity  
4  
5 204 and address research misconduct allegations, and deficient implementation of policies  
6  
7  
8 205 and procedures, and  
9  
10 206 6. Abusive or irresponsible publication practices by journal editors and peer reviewers  
11  
12 (NAS 2017).  
13  
14

15 208 The term “scientific integrity” is sometimes used synonymously with research integrity.  
16  
17 209 However in recent usage, the term has included insulation of science from political interference,  
18  
19 210 manipulation, or suppression of science (Doremus 2007; Douglas 2014). The term “scientific  
20  
21 211 integrity” has been used in government science policy in the United States. There, scientific  
22  
23 212 integrity guidelines were developed in an overarching sense that includes research integrity at the  
24  
25 213 individual and institutional level, but were also intended to protect federal scientists from  
26  
27 214 political interferences. Political officials were not to alter or suppress scientific findings, and  
28  
29 215 transparency was encouraged in the preparation of the government-supported scientific research  
30  
31 216 (Obama 2009; Stein and Eilperin 2010). The scientific integrity guidelines in the US were  
32  
33 217 followed by derivative policies intended to put substance to the transparency provisions,  
34  
35 218 requiring open-access to federally funded research articles and more importantly, requiring  
36  
37 219 archiving and public availability of the underlying raw data (Holdren 2013). These broad  
38  
39 220 policies become more specific and procedural in government science agencies, and expanded to  
40  
41 221 codes of scholarly and scientific conduct such as a list of 19 principles for the U.S. Department  
42  
43 222 of Interior (U.S. Department of Interior 2014).  
44  
45  
46  
47  
48  
49

50 223 We expect the vast majority of scientists consider themselves to hold science integrity, as self-  
51  
52 224 defined in terms of honesty, transparency, and objectivity, sticking to the research question and  
53  
54 225 avoiding bias in data interpretation (e.g., Shaw and Satalkar 2018). Yet most scientists will  
55  
56  
57

*Review draft – not for distribution or attribution*

1  
2  
3 226 encounter ethically ambiguous situations. For instance, some may feel that they struggle to  
4  
5 227 advance science against a rising tide of administrative requirements accompanied by declining  
6  
7 228 support for science and increasing competition for funding. When does cutting through  
8  
9 229 bureaucratic institutional requirements cross the line from being commendable efficiency to  
10  
11 230 violating research integrity rules? Using grant/project funds for unrelated conference travel?  
12  
13 231 Should minor misbehaviors such as posting ones' article on a website after signing a publication  
14  
15 232 and copyright transfer agreement with the publisher agreeing not to do so still be considered  
16  
17 233 misbehaviors when done by many? When does cleaning data become cooking data when, for  
18  
19 234 example, anomalous values are suppressed? There are many ethically ambiguous situations in  
20  
21 235 which scientists may consider doing the "right thing" (compliance with all rules) might need to  
22  
23 236 be balanced with doing the "good thing," especially when the welfare of others such as students  
24  
25 237 or subordinates is involved (Johnson and Ecklund 2016).

26  
27  
28  
29  
30  
31 238 To us, scientific integrity can be simplified to personal integrity plus a few profession-specific  
32  
33 239 provisions of transparency and reproducibility. At their roots, these norms are those children are  
34  
35 240 hopefully exposed to in primary school. *Tell the truth, and tell the whole truth* (no data  
36  
37 241 sanitizing, selective reporting, and report all conflicts), *tell both sides of the story* (avoid bias), *do*  
38  
39 242 *your own work* (no plagiarism), *read the book, not just the back cover before writing your report*  
40  
41 243 (properly research and cite primary sources), *show your work for full credit* (transparency),  
42  
43 244 *practice makes perfect* (reproducibility), *share* (publish your work and data in peer-reviewed  
44  
45 245 outlets for collective learning), and *listen* (with humility and collegial fraternity to observations  
46  
47 246 and suggestions of others). Finally, the golden rule "*do unto others as you would have them do*  
48  
49 247 *unto you*" should resonate throughout the professional interactions of environmental scientists,  
50  
51 248 and especially in peer reviewing and data sharing. When encountering an inevitable science  
52  
53  
54  
55  
56  
57  
58  
59  
60

*Review draft – not for distribution or attribution*

1  
2  
3 249 dispute, keep criticisms objective, constructive, and focused on the work and not the worker; do  
4  
5 250 peer reviews of your rivals' work as you would hope to receive reviews of your own, reward and  
6  
7  
8 251 recognize good behavior in science, and so on.  
9  
10

## 11 252 **The interested scientist: conflicts of interest, competing interests, and bias**

12  
13

14 253 Although as far as we know, outright fraud or deliberate campaigns to manipulate science are  
15  
16 254 rare in the environmental sciences, at some points in their careers almost every practicing  
17  
18 255 scientist has to grapple with questions of conflicting or competing interests and must guard  
19  
20  
21 256 against bias in approaches and interpretation. Conflicts of interest refer to those where the  
22  
23 257 scientists stands to gain financially from their work. Competing interests are areas where non-  
24  
25 258 financial factors compete with objectivity, such as personal friendships or dislikes, having taken  
26  
27  
28 259 public stances on an issue, political, academic, ideological, or religious affiliations (Nature  
29  
30 260 Editors 2018; PLOS Medicine Editors 2008). Bias in study design or data interpretation may  
31  
32 261 arise from either conflicts or competing interests and can be either overt or unrecognized by the  
33  
34  
35 262 scientist (Lackey 2007).  
36  
37

38 263 Generally, the concern over conflicting or competing interests in science is that secondary  
39  
40 264 interests such as financial gain or maintaining professional relationships compromise the primary  
41  
42 265 interest of upholding scientific norms such as reporting data accurately and completely,  
43  
44 266 interpreting data appropriately, and acknowledging value judgments or interpretive assumptions  
45  
46  
47 267 (Elliott 2014). Conflict of interest policies may be better developed in the biomedical fields than  
48  
49 268 in the applied environmental sciences because the former often involves human participants, and  
50  
51 269 because of the strong financial ties between academia and the pharmaceutical industry (Tollefson  
52  
53  
54 270 2015). For instance, if a research team is reporting on the efficacy of a medical device or a  
55  
56  
57

Review draft – not for distribution or attribution

271 pharmaceutical, and they or their employers hold a patent or stand to gain financially from a  
 272 positive report, then they clearly have a financial conflict of interest.

273

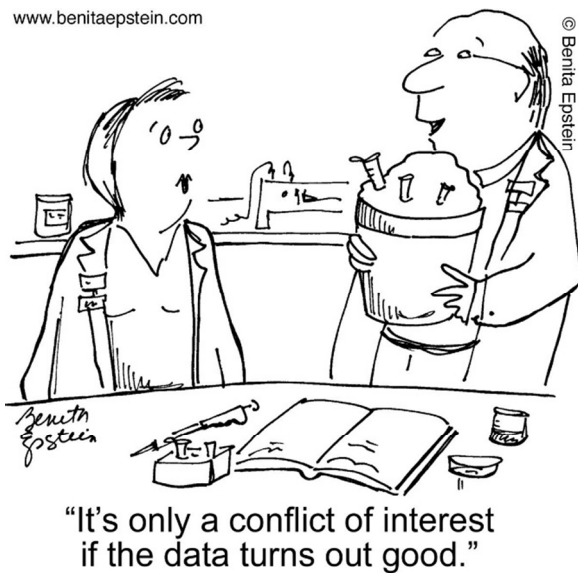

274

275 **Figure 1.** Conflicts of interest in science arise when secondary interests such as financial gain or maintaining  
 276 professional relationships compromise the primary interest of upholding scientific norms such as the objective  
 277 design, conduct, and interpretation of studies and the open sharing of scientific discoveries to advance our  
 278 collective learning (© Benita Epstein, used with permission.)

279

280 The mere existence of a potential conflict of interest should not throw results in doubt where  
 281 it is disclosed and acknowledged appropriately. However, although most authors in the  
 282 environmental sciences routinely disclose funding sources that could be perceived as potential  
 283 conflicts of interest, major omissions have occurred (Oreskes et al. 2015; Ruff 2015; Tollefson  
 284 2015). For instance, the findings of a study on risks of contamination from natural gas extraction  
 285 from hydraulic fracturing of bedrock were undermined when it came out that (unbeknownst to

*Review draft – not for distribution or attribution*

1  
2  
3 286 the university) the research supervisor was being paid 3X his university salary by serving as an  
4  
5 287 advisor to an oil and gas company invested in the practice. The failure to disclose this financial  
6  
7 288 relationship in the publication brought the study’s objectivity and credibility into question,  
8  
9  
10 289 independent of its substance (Stokstad 2012). Authors and journals have been criticized for  
11  
12 290 gaming ethical financial disclosure requirements, such as by overly narrow disclosures or  
13  
14 291 disclosing a conflict in the cover letter to the editor accompanying the manuscript (which doesn’t  
15  
16  
17 292 get published) but not including it in the actual article (Marcus and Oransky 2016).  
18  
19

20 293 The detail of conflict of interest disclosures vary. The shortest (and least informative)  
21  
22 294 statement we have seen was that “*the usual disclaimers apply*” (Descamps 2008), while the  
23  
24 295 detailed disclosures expected in biomedical literature can go on for pages (Baethge 2013; ICMJE  
25  
26 296 2016). Requirements for highly detailed disclosures risk diminishing their importance to that of  
27  
28 297 the “fine print” cautions the writers would just as soon the readers not take the time to carefully  
29  
30  
31 298 read. Much like computer software user agreements or the ubiquitous consumer product safety  
32  
33 299 stickers that may be written more to avoid product liability than for consumer safety, detailed  
34  
35 300 conflict of interest disclosures may reach a point of diminishing returns. Twenty years ago,  
36  
37  
38 301 Goodstein (1995) grouched that he was tired of reading disclosure statements that were longer  
39  
40 302 than the methods sections in papers, and they have been expanded upon since. Similarly, our  
41  
42 303 view is that in ecotoxicology and the environmental sciences, simple, unambiguous statements of  
43  
44 304 the funding sources that allowed the work to be completed should generally be sufficient.  
45  
46  
47

48 305 Non-financial competing factors may also compete with scientific objectivity. Factors or  
49  
50 306 values such as these are usually termed “competing interests” reserving “conflicts of interest” for  
51  
52 307 financial conflicts (Nature Editors 2018; PLOS Medicine Editors 2008). In our experience,  
53  
54 308 competing interests are rarely if ever mentioned in environmental science publications. Rather,  
55  
56  
57



*Review draft – not for distribution or attribution*

1  
2  
3 309 they are often discussed behind the scenes, such in correspondence between an editor and  
4  
5 310 potential reviewers, along the lines of “*yes I would be happy to review this article and believe I*  
6  
7 311 *can be objective, however, you should know that I used to be a labmate of the PI and we*  
8  
9 312 *collaborated on an article 3 years ago.*” Whether or how competing interests or values affect the  
10  
11 313 assumptions and perspectives of scientists’ should be more formally stated is an area of rich  
12  
13 314 debate in the philosophy of science literature (Douglas 2015; Elliott 2016; PLOS Medicine  
14  
15 315 Editors 2008).

16  
17  
18  
19 316 We reiterate our belief that the existence of a potential conflicts or competing interests is a  
20  
21 317 ubiquitous part of the environmental science landscape and do not indicate poor science. Most  
22  
23 318 scientists strive to present unbiased data and interpret their data evenhandedly. However, the  
24  
25 319 varied experiences of scientists can influence their perspectives in ways that they may not  
26  
27 320 recognize themselves. The transparency in disclosure reminds the reader to consider perspectives  
28  
29 321 and alternate interpretations when judging the merits of a study, synthesis paper, or risk  
30  
31 322 assessment.

### 32 323 *Bias*

33  
34  
35  
36  
37 324 Many of the published concerns in the environmental science literature come down to  
38  
39 325 cognitive bias. Science is not value free, and personal bias in interpreting science is often related  
40  
41 326 to differing worldviews (Douglas 2015; Elliott 2016; Lackey 2001; Nuzzo 2015). For instance,  
42  
43 327 the collapse of major fisheries that ostensibly had been scientifically managed for sustainable  
44  
45 328 yields helped inspire the Precautionary Principle. This philosophy sought more cautious  
46  
47 329 management and the reversal of the burden of proof for sustainable exploitation of natural  
48  
49 330 resources to put it on industry not management agencies (Peterman and M'Gonigle 1992). Those  
50  
51 331 with precautionary principle or risk assessment worldviews may interpret the same set of facts

*Review draft – not for distribution or attribution*

1  
2  
3 332 very differently. The precautionary principle adherent may emphasize absence of conclusive  
4  
5 333 evidence of safety, and the risk assessment adherent may emphasize absence of conclusive  
6  
7 334 evidence of harm (Fairbrother and Bennett 1999). In such settings, values and biases are  
8  
9  
10 335 interwoven. Even self-disciplined scientists who seek openness and objectivity carry some biases  
11  
12 336 from experiences and acculturation (here meaning how working in different environmental  
13  
14 337 organisations can lead scientists to modify their thinking). Recognizing sources of bias does not  
15  
16 338 imply ill intent, for just the process of acculturation to a particular place of employment can bias  
17  
18  
19 339 perceptions and inclinations (Brain et al. 2016; Suter and Cormier 2015a, b).

22 340 Professional societies such as SETAC can serve as a form of acculturation; some of the  
23  
24 341 authors of this essay have been active members of SETAC for much longer than they have been  
25  
26 342 employed by any single employer. Even self-disciplined scientists who seek openness and  
27  
28 343 objectivity carry biases from their experiences. What becomes particularly difficult to self-  
29  
30 344 regulate is the convergence of cognitive bias, a human nature to seek to please one's patron, and  
31  
32 345 the interests of one's employer or client. For instance, studies funded by drug or medical device  
33  
34 346 makers tend to favor the company funding the research (Lexchin et al. 2003; Smith 2006). That  
35  
36 347 might reflect the self-interest and bias of the sponsor, or the researchers' intimate knowledge and  
37  
38 348 their ability to obtain the resources and skill to carry out well focused and rigorous research  
39  
40  
41 349 (Macleod 2014). These influences doubtfully can be completely separated. To us, disclosure,  
42  
43 350 transparency and balanced external reviews are presently the best pragmatic approach to  
44  
45 351 managing cognitive biases.

50 352 Tit for tat, adversarial claims of bias in the scientific literature doubtfully advance the science.  
51  
52 353 Conflicting perspectives can become personalized and intractable. How to know which is more  
53  
54 354 credible? Neither? Both? Food nutrition researchers pointed out examples of selective data  
55  
56  
57  
58  
59  
60

*Review draft – not for distribution or attribution*

1  
2  
3 355 interpretations and publication bias in obesity research in relation to sweetened beverage (soft  
4  
5 356 drink) consumption and in the health benefits of breast feeding. They termed this distortion of  
6  
7 357 information to further what may be perceived to be righteous ends as “white hat bias” (Cope and  
8  
9 Allison 2009). However, their financial backing from the soft drink industry and from  
10 358  
11 manufacturers of baby formula contributed to criticisms of their own objectivity (Bes-Rastrollo  
12 359  
13 et al. 2014; Harris and Patrick 2011). Unresolved in the claims and counter-claims of bias and  
14 360  
15 financial conflicts of interest was what advice was most credible.  
16 361  
17  
18  
19

20 362 In environmental toxicology as well, controversies over the best interpretation of sometimes  
21  
22 363 ambiguous facts can become entrenched and focused on the people holding differing views as  
23  
24 364 much as the evidence behind the different views. Examples include disagreements over risks of  
25  
26 365 atrazine to amphibians (Aviv 2014; Hayes 2004; Solomon et al. 2008); sufficiently safe levels of  
27  
28 366 selenium for fish and birds (Renner 2005; Skorupa et al. 2004); and 20 years on, disputes over  
29  
30 indirect effects of oil spills on salmon (Burton and Ward 2012). These intractable, mutual bias  
31 367  
32 criticisms make it very difficult for non-specialist readers to make informed judgements of which  
33 368  
34 is the more credible science.  
35 369  
36  
37  
38

39 370 Suter and Cormier (2015a) noted that conflicting assessments on the same question that have  
40  
41 371 been produced by government agencies, industries, and environmental advocacy groups suggest  
42  
43 372 that biases occur during assessment processes. Sources of bias include personal bias, regulatory  
44  
45 373 capture, advocacy, reliance on volunteer experts, biased stakeholder and peer review processes,  
46  
47 374 literature searches, excluding new science through dependence on standard methods,  
48  
49 inappropriate standards of proof, misinterpretation, and ambiguity. Assessors can adopt practices  
50 375  
51 to increase objectivity, transparency, and clarity (Suter and Cormier 2015a).  
52 376  
53  
54  
55  
56  
57  
58  
59  
60

*Review draft – not for distribution or attribution*

1  
2  
3 377 *Some particularly challenging situations in ecotoxicology* – Some situations that seem  
4  
5 378 particularly challenging for researcher and institutions to maintain scientific credibility warrant  
6  
7 379 mention. Elliott (2014) argued that scientific findings that are ambiguous or require a good deal  
8  
9 380 of interpretation or are difficult to establish in an obvious and straightforward manner are prone  
10  
11 381 to bias, particularly if strong incentives to influence research findings in ways that damage the  
12  
13 382 credibility of research are present. In environmental toxicology, risk assessments or critical  
14  
15 383 reviews fit that test and can be vulnerable to bias, particularly when funded by sponsors with  
16  
17 384 financial interests in the findings (Suter and Cormier 2015a). This can be heightened by how  
18  
19 385 variability and large uncertainties are handled in environmental toxicology and associated risk  
20  
21 386 assessments and syntheses -- for example extrapolation of results from one or more species to  
22  
23 387 protection of wide swaths of our world’s biodiversity; or the difficulty in reproducing field  
24  
25 388 studies; or the variability of chemical exposures across diverse and expansive landscapes and  
26  
27 389 waters. These challenges may lead to differences of opinion on methods for drawing  
28  
29 390 conclusions to support decision-making that, while prone to bias, have, at their root, the need for  
30  
31 391 drawing conclusions in the face of uncertainty.

32  
33 392 Costs of large-scale projects to remediate contaminated environments such as sediments  
34  
35 393 contaminated by urban and industrial sources, aged industrial facilities, or large mining  
36  
37 394 operations can be extremely expensive, running to the hundreds of millions of dollars. In  
38  
39 395 “polluter-pays” schemes, the potential financial liability associated with such a finding could  
40  
41 396 imperil the ongoing viability of companies, which in turn would affect the livelihoods of  
42  
43 397 employees, among other social disruptions. In such a setting, the scientists working on behalf of  
44  
45 398 the those who may have to incur the costs of cleanup might understandably be more cautious  
46  
47 399 about the potential for misguided remediation following Type I error (e.g., falsely discovering  
48  
49  
50  
51  
52  
53  
54  
55  
56  
57  
58  
59  
60

*Review draft – not for distribution or attribution*

1  
2  
3 400 environmental degradation) than Type II error (failing to discover degradation when in fact it is  
4  
5 401 occurring), when the science is ambiguous. Conversely, the regulatory scientists entrusted to  
6  
7 402 provide scientific advice to protect environmental quality might be obliged to err on the side of  
8  
9 403 precaution, and be more accepting of risk of Type I error, especially when it is other peoples'  
10  
11 404 money at stake.  
12  
13  
14

15 405 While science ethicists and the NAS (Boden and Ozonoff 2008; Elliott 2014; Krinsky 2005;  
16  
17 406 NAS 1992) may emphasize industry funding as a pressure for bias, these pressures are not  
18  
19 407 unique to industry funding of science. Natural resource damage assessment (NRDA) is an  
20  
21 408 example in the environmental toxicology field where government-funded science has strong  
22  
23 409 incentives to generate biased science or assessments. NRDA's compensate for harm to natural  
24  
25 410 resources from oil spills or poorly managed industrial activities have been good for the  
26  
27 411 environment, but as practiced in many countries have parallels to the legal and science tactics of  
28  
29 412 product liability torts (Descamps 2008). The potential for recovering fees or paying substantial  
30  
31 413 penalties can provide financial incentives for lawyers, regulators, or resource trustees and  
32  
33 414 interested parties to pursue cases (Murray et al. 1999). This environment produces an atmosphere  
34  
35 415 with strong incentives for plaintiff/trustee science advisors to exaggerate the magnitude and  
36  
37 416 spatial extent of effects to the environment and to downplay uncertainties or the influence of  
38  
39 417 potential other, non-compensable stressors and vice versa for those scientists retained to help  
40  
41 418 defend against claims. Maintaining objectivity and advancing science in such a work  
42  
43 419 environment would require extraordinary self-discipline by the individual scientists, an  
44  
45 420 institutional environment emphasizing science first, and an openness to external, disinterested  
46  
47 421 review (Boden and Ozonoff 2008; Elliott 2014; Wagner 2005).  
48  
49  
50  
51  
52  
53  
54  
55  
56  
57  
58  
59  
60

*Review draft – not for distribution or attribution*

1  
2  
3 422 Defense of science and engineering in favor of protecting enterprises reflecting years of  
4  
5 423 devoted work are understandable, but is dangerous when objectivity is compromised. Case  
6  
7 424 studies such as the Vioxx case, in which the maker of the drug downplayed increased risks of  
8  
9 425 mortality from a successful product in which they were deeply vested (Curfman et al. 2005;  
10  
11 426 McClellan 2008) and the cross-claims of blame in the aftermath of the Mount Polley mine tailing  
12  
13 427 dam failure (Topf 2016), remind us that objective science (including recognizing and disclosing  
14  
15 428 uncertainty, and encouraging additional science to narrow that uncertainty) is good business.  
16  
17  
18  
19

20 429 *Academic – Industry Collaborations*  
21  
22

23 430 The role of industry funding and concerns of perceived conflicts of interest in academic-  
24  
25 431 industry collaborations have been addressed in literature and are a common element in  
26  
27 432 institutional research integrity policies (Elliott 2014; Resnik and Shamoo 2011). Often through  
28  
29 433 philanthropic foundations, industry may contribute to basic science education and research to  
30  
31 434 strengthen regional universities and further the science literacy of potential workforce and  
32  
33 435 society. Industry may also support applied ecotoxicology and other environmental science  
34  
35 436 research to inform specific scientific questions that affect their business interests. When industry  
36  
37 437 and academic research interests become at least partially congruent, academic scientists may  
38  
39 438 actively seek out such interest and support for their projects and graduate students.  
40  
41  
42 439 Pragmatically, academic-industry collaborations are necessary since public funding alone may be  
43  
44 440 insufficient to support graduate research or to address important questions relevant to industry  
45  
46 441 and society. For instance in the US, about 40% of national research and development is funded  
47  
48 442 by the private sector (NAS 2017). In the US, public funding for university research on the effects  
49  
50 443 of chemicals in the environment has consistently declined since 2000 (Bernhardt et al. 2017;  
51  
52  
53  
54  
55  
56  
57  
58  
59  
60

*Review draft – not for distribution or attribution*

1  
2  
3 444 Burton et al. 2017), which implies that without industry-academic collaborations, there would be  
4  
5 445 much less substantive university research in the field.  
6  
7

8 446 Benefits of collaboration run both ways, with expertise from academic and public sectors  
9  
10 447 helping industry find solutions to lessen or avoid contributing to environmental problems  
11  
12 448 (Hopkin 2006). The interchange of science through academic, industry, and government  
13  
14 449 scientists is deeply rooted in SETAC culture, and the favorable views of the authors toward  
15  
16 450 working across sectors is undoubtedly influenced through our history with SETAC. However,  
17  
18 451 industry support to academics or others in support of applied environmental questions may come  
19  
20 452 with inherent conflicts of interest, and critics may consider scientists as collaborators in the  
21  
22 453 pejorative sense of the word (Hopkin 2006). This setting requires vigilance from both industrial  
23  
24 454 research sponsors and recipients to avoid bias.  
25  
26  
27  
28

29 455 While readers might presume situations in which individuals or institutions with strong  
30  
31 456 incentives to influence research findings consistent with their financial interests will do so, it is  
32  
33 457 important not to judge a study solely by its funder, nor to presume the sponsor's preferred  
34  
35 458 outcome. For example, an energy company sponsored a study to see if they could develop a  
36  
37 459 scientific case for relief from costly requirements for meeting dissolved oxygen criteria in a river  
38  
39 460 downstream of its hydroelectric dam. Instead they developed evidence that the existing criteria  
40  
41 461 could impair hatching salmon (Geist et al. 2006). The company scientists easily could have  
42  
43 462 buried the results, which could have been discounted as being from novel techniques. Their path  
44  
45 463 of least resistance would have been to leave the study in the file drawer, rather than going to the  
46  
47 464 trouble of defending novel science and publishing it in the open literature. In the long-view, a  
48  
49 465 reputation of science credibility may be more valuable for companies than short-term project  
50  
51 466 benefits.  
52  
53  
54  
55  
56  
57  
58  
59  
60

*Review draft – not for distribution or attribution*

1  
2  
3 467 Other examples include scientists from mining and metals trade groups publishing studies  
4  
5 468 showing that existing USEPA criteria for zinc and other metals could be under-protective of  
6  
7 469 aquatic species or entire communities (Brix et al. 2011; DeForest and Van Genderen 2012).  
8  
9  
10 470 Conversely, a university quantitative ecologist accepted support from an environmental  
11  
12 471 advocacy group (through university channels) to model the potential population-level effects of  
13  
14 472 elevated selenium from mining on local native trout populations (Van Kirk and Hill 2007). As  
15  
16 473 the advocacy group had been a persistent opponent of the mining operations, officials from the  
17  
18 474 influential mining company apparently presumed that the academics' work would also be biased  
19  
20 475 to favor the advocacy group's positions, and they questioned the researchers' probity  
21  
22 476 (Blumenstyk 2007). In fact, the selenium concentrations projected by these academics to cause  
23  
24 477 detrimental population-level effects were higher than concentrations previously derived by  
25  
26 478 industry-funded consultants who themselves had been on the receiving end of bias implications  
27  
28 479 because they were aligned with corporate interests (Skorupa et al. 2004; Van Kirk and Hill  
29  
30 480 2007). As these examples show, judging science and scientists solely by their funding may be  
31  
32 481 unfair and lead to misjudgments.  
33  
34  
35  
36  
37

38 482 In keeping with the adage to be careful judging a book by its cover or wine by its label,  
39  
40 483 judging science by its funder or by presumed interests or leanings of the scientists can lead to  
41  
42 484 mistaken and unfair perceptions. Brain et al. (2016) pointed out that the career path of  
43  
44 485 environmental scientists is often ambiguous and whether scientists ended up in careers with  
45  
46 486 industry, academic, or government science has more to do with chance and timing of  
47  
48 487 opportunities rather than a particular desire to work in one sector or another. Such is often the  
49  
50 488 case with academic and government scientists who work with industry to jointly fund or  
51  
52 489 investigate a science question of mutual interest (Hopkin 2006). The convergence of scientific  
53  
54  
55  
56  
57  
58  
59  
60



Review draft – not for distribution or attribution

1  
2  
3 490 interests with financial interests can lead to a good marriage, so long as the parties are principled  
4  
5  
6 491 and forthright with each other. “Interested” science” should be viewed with open-minded  
7  
8 492 skepticism, and studies with immense financial implications warrant a higher level of scrutiny  
9  
10 493 than others (Krumholz et al. 2007; Suter and Cormier 2015b; van Kolfschooten 2002). It does  
11  
12 494 not necessarily follow that interested science is wrong or tainted.  
13  
14  
15  
16  
17  
18  
19

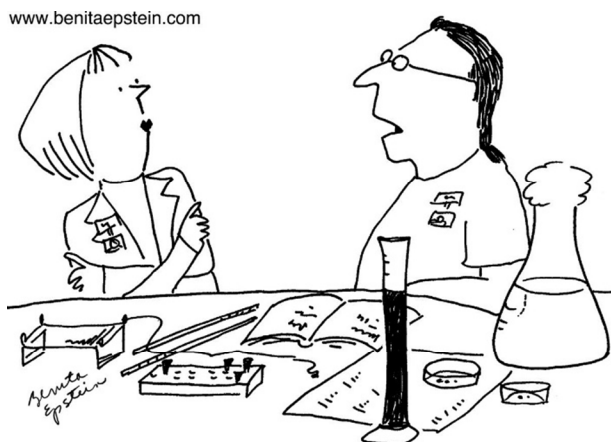

20  
21  
22  
23  
24  
25  
26  
27  
28  
29  
30  
31  
32  
33  
34  
35 "I already wrote the paper. That's  
36 497 why it's so hard to get the right data."  
37  
38

39 **Figure 2.** Confirmation bias is the tendency to seek and interpret evidence in a way that confirms preexisting  
40  
41 499 beliefs, and gives less consideration to alternative hypotheses (© Benita Epstein, used with permission)].  
42  
43

44 500  
45  
46  
47 501  
48  
49  
50 502 *A scientific society founded on the principles of balancing competing interests*  
51

52  
53 503 Scientific societies have important roles in promoting scientific integrity and ethical conduct,  
54  
55 504 such as establishing codes of ethics which include disclosure of conflicts of interest, being a  
56  
57

*Review draft – not for distribution or attribution*

1  
2  
3 505 focal point for developing and communicating discipline-specific standards to foster research  
4  
5 506 integrity, and providing educational material (AAAS 2000; NAS 2017).  
6  
7

8 507 We think the Society of Environmental Toxicology and Chemistry (SETAC) is notable for its  
9  
10 508 directed and sustained efforts to balance competing perspectives in its deliberative processes and  
11  
12 509 other activities. The founding principles and structure of SETAC sets out a tripartisan structure  
13  
14 510 with regulatory, industrial, and academic scientists (Bui et al. 2004). As a result, SETAC now  
15  
16 511 has well developed norms for balancing interests, inclusiveness of differing viewpoints, and  
17  
18 512 neutrality in the reporting. These norms have enabled SETAC to be regarded as a source of  
19  
20 513 consensus-based science with successful partnership or advisory roles in United Nations  
21  
22 514 programs and conventions such as the United Nations Environment Programme’s (UNEP)  
23  
24 515 Global Mercury Partnership, Stockholm Convention on persistent organic pollutants, UNEP-  
25  
26 516 SETAC Life Cycle Initiative for reducing hazardous waste as well as informing national-level  
27  
28 517 legislation (Augsburger 2014; Mozur 2012). The intended balanced representation of industry,  
29  
30 518 government, and academia isn’t always achievable, for there are also guidelines for gender  
31  
32 519 equity, geographic representation, and of course people have to be willing to volunteer. Further,  
33  
34 520 the tripartisan emphasis underrepresents scientists from environmental advocacy groups. These  
35  
36 521 groups are influential for shaping public debate, policy and law on environmental issues, but  
37  
38 522 their low participation in the Society suggests that they may not be attracted to or feel welcomed  
39  
40 523 by a “hard” scientific society such as SETAC. Despite these imperfections, the norms of seeking  
41  
42 524 to balance potentially conflicting interests and to provide a safe forum to express differing  
43  
44 525 scientific viewpoints are deeply ingrained in the Society’s culture and activities.  
45  
46  
47  
48  
49  
50  
51  
52  
53  
54  
55  
56  
57  
58  
59  
60

*Review draft – not for distribution or attribution*

## 526 **Promoting scientific integrity in ecotoxicology**

527 While “scientific integrity” is ultimately a subjective judgment that cannot easily be reduced  
528 to review checklists, there are some general points to maintain in ecotoxicology and related  
529 science. These include relevance, rigor, reproducibility, objectivity, and transparency.

### 530 *Relevance*

531 By definition, environmental chemistry and ecotoxicology is concerned with how chemicals,  
532 both natural and synthetic, pose a threat or influence the natural world (Johnson et al. 2017).  
533 Because of pragmatic and ethical constraints, research in this domain is often done in laboratory  
534 environments, testing cultured laboratory organisms or cell lines or other in vitro surrogates for  
535 organisms. However, the intent of such research invariably still has some intended relevance to  
536 conditions that occur in the environment. We have seen articles in ecotoxicology literature  
537 discussing some novel research based on under-tested taxa, underappreciated endpoints,  
538 unexpected multiple stressor effects, or unanticipated indirect effects via untested commensal  
539 microbes. An article may start out with an introduction on the ecological importance of the  
540 novel work, the work is reported, and then the discussion closes arguing that ecological  
541 importance of their work, how it should change the thinking in the field, and management  
542 implications. Yet to obtain their desired experimental effects, exposure concentrations may have  
543 been orders of magnitude higher than those typical in the real world, or exposure routes,  
544 chemical forms, or dilution media may be unlike those that they organisms could encounter in  
545 nature (Johnson and Sumpter 2016; Mebane and Meyer 2016). When authors present such  
546 studies with a narrative on the ecological importance of their topic, this may be a form of  
547 misrepresentation.

*Review draft – not for distribution or attribution*

1  
2  
3 548 *Rigor*  
4  
5

6 549 Funders, journals, and institutions reward novelty, such as the short-lived discovery of a  
7  
8 550 bacterium that grows with arsenic instead of phosphorus (Alberts 2012). Highly selective  
9  
10 551 journals with article acceptance rates of 10% or less preferentially publish findings that are  
11  
12 552 surprising. These incentives are influential because universities and research institutes often hire  
13  
14 553 and promote scientists based on their record of acquiring grant money and the number of  
15  
16 554 publications times the journal impact factors of the journals published therein (Parker et al.  
17  
18 555 2016). With finite career opportunities and high network connectivity, the marginal return for  
19  
20 556 being in the top tier of publications may be orders of magnitude higher than an otherwise  
21  
22 557 respectable publication record (Smaldino and McElreath 2016). The editorial quest for novelty  
23  
24 558 has led to publication of questionable articles in elite journals, such as one positing that  
25  
26 559 caterpillars were the results of accidental sex between insects and worms (Borrell 2009). Top tier  
27  
28 560 journals also tend to have higher retraction rates than mid-tier journals, suggesting that rigor has  
29  
30 561 sometimes been compromised in the competition for paradigm shifting results (Nature Editors  
31  
32 562 2014).  
33  
34  
35  
36  
37

38 563 In ecotoxicology, Harris et al (2014) describe 12 basic principles of sound ecotoxicology that  
39  
40 564 should apply to most environmental toxicity studies. These principles range from carefully  
41  
42 565 considering essential aspects of experimental design through to accurately defining the exposure,  
43  
44 566 adequate replication, unbiased analysis and reporting of the results, and repeating experiments  
45  
46 567 that yielded surprising or ambiguous responses. There are ample opportunities for improvement.  
47  
48 568 For example, Harris and Sumpter (2015) asked a very basic question of a sample of studies  
49  
50 569 published in 2013 in three leading ecotoxicological publications: was the concentration of the  
51  
52 570 test chemical actually measured? Of the studies reviewed from *Environmental Toxicology and*  
53  
54  
55  
56  
57

Review draft – not for distribution or attribution

1  
2  
3 571 *Chemistry*, 20% failed this basic aspect of experimental credibility, as did 33% and 41% of  
4  
5 572 ecotoxicology studies published in *Aquatic Toxicology*, and *Environmental Science and*  
6  
7 573 *Technology*, respectively (Harris and Sumpter 2015).  
8  
9

10 574 While Harris et al. (2014) emphasized laboratory-based studies, field-based environmental  
11  
12 575 effects studies replace the challenges of the artificiality and questionable relevance of some  
13  
14 576 laboratory-based toxicity testing, with different, messy, real world challenges. Closely related to  
15  
16 577 the 12 principles described by Harris et al, we suggest 8 basic principles relevant to most field-  
17  
18 578 based ecotoxicological studies or environmental effects monitoring.  
19  
20  
21

- 22 579 1. The study design is grounded in a good understanding of the test questions  
23  
24 580 (Lindenmayer and Likens 2010; Suter et al. 2002);  
25  
26 581 2. The ability to identify and reliably measure sensitive indicators (Melvin et al. 2009),  
27  
28 582 3. Careful attention to appropriate reference conditions to avoid potential, actual effects  
29  
30 583 being masked by variability or confounding factors introduced by differences  
31  
32 584 between the reference and test site environments (Arciszewski and Munkittrick 2015;  
33  
34 585 Mebane et al. 2015). For example, beaches on rocky headlands and protected bays  
35  
36 586 will have very different benthic invertebrate communities, as do flowing rivers and  
37  
38 587 impounded reservoirs. Study designs that attempt to detect pollution effects on  
39  
40 588 communities across such disparate habitats may have very low discriminatory power  
41  
42 589 and by failing to account for natural variability, adverse pollutant effects could be  
43  
44 590 obscured (Buys et al. 2015; Parker and Wiens 2005; Wiens and Parker 1995);  
45  
46 591 4. Try to study a number of locations that vary in the degree of the factor under  
47  
48 592 investigation, such as chemical pollution, in order to (hopefully) demonstrate a  
49  
50  
51  
52  
53  
54  
55  
56  
57  
58  
59  
60

*Review draft – not for distribution or attribution*

1  
2  
3 593 positive relationship between exposure to the environmental factor of interest and the  
4  
5 594 effect of that factor.

6  
7  
8 595 5. Time and patience. Just as experimental exposures need to be of appropriate duration  
9  
10 596 for effects of interest to be manifested, environmental monitoring needs to be  
11  
12 597 maintained long enough to pick up true trends if present, or to convincingly argue that  
13  
14 598 trends are not present (Lindenmayer and Likens 2010; Melvin et al. 2009).

15  
16  
17 599 6. Specific definitions of what effects are considered negligible or of concern  
18  
19 600 (Munkittrick et al. 2009; Power et al. 1995).

20  
21 601 7. Avoid power failures: use a statistical approach appropriate to the question,  
22  
23  
24 602 considering statistical burden of proof issues. For instance,  $P > 0.05$  in testing for  
25  
26 603 trends or differences between locations does not by itself show the lack of trend or  
27  
28 604 effects (Dixon and Pechmann 2005; Mudge et al. 2012).

29  
30  
31 605 8. Transparent reporting with detailed methods and raw data sufficient for others to  
32  
33 606 reproduce the analyses or to further examine the data using alternative analyses (Duke  
34  
35 607 and Porter 2013; McNutt et al. 2016; Schäfer et al. 2013).

36  
37  
38  
39 608 *Reproducibility*

40  
41 609 Reproducibility is one indicator of reliable research. However, the inability of researchers to  
42  
43 610 reproduce influential studies of others or their own has garnered enough attention to be called a  
44  
45 611 “reproducibility crisis” (Baker 2016a; Henderson and Thomson 2017). However, not all studies  
46  
47 612 are easily reproduced. Environmental data are often messy, field studies are more often  
48  
49  
50 613 observational than experimental, large scale, ecologically realistic studies such as long-term,  
51  
52 614 experimental lake studies difficult to do even once, and no one wishes to replicate mishaps such  
53  
54  
55 615 as tailings dam failures or oil spills (Parker and Wiens 2005; Schindler 1998; Wiens and Parker

*Review draft – not for distribution or attribution*

1  
2  
3 616 1995). Such studies require a logical system for causal inference to separate cause-and-effect  
4  
5 617 from serendipitous correlations (Norton et al. 2002; Suter et al. 2002). Even rigorous laboratory  
6  
7 618 studies may be difficult to replicate due to the highly variable nature of biological systems and  
8  
9 619 unanticipated responses to unknown factors. Demands for reproducibility may favor industrial  
10  
11 620 science over academic science. Industry often works within strict Good Laboratory Practice  
12  
13 621 (GLP) rules and with well-studied species tested through standardized protocols (Elliott 2016).  
14  
15 622 Academic science is often framed around education, and grants and graduate student research are  
16  
17 623 usually required to go after something new and novel; protocols may be developed as they go,  
18  
19 624 and quality control may be uneven (Baker 2016b). Obstacles to adopting formalized quality  
20  
21 625 management systems such as GLP in small research settings may include costs, lack of  
22  
23 626 resources, lack of mandate, independent cultures, and high turnover. Nevertheless, even if  
24  
25 627 regulatory GLP compliance is not required, small academic research facilities can benefit from  
26  
27 628 embracing core components of GLPs, such as defining responsibilities, maintenance and  
28  
29 629 sanitation of common lab spaces, equipment and materials, well defined experimental protocols,  
30  
31 630 quality control testing, data reviews, audits, and archiving (Bornstein-Forst 2017).  
32  
33  
34  
35  
36  
37

38 631 Better experimental protocols that are easier to follow is one tangible way to strive for better  
39  
40 632 reproducibility and transferability of both novel and standard experimental methods. Multimedia  
41  
42 633 experimental protocols could be much easier to explain and teach techniques than the  
43  
44 634 conventional, densely worded, printed protocols. The Journal of Visualized Experiments (JoVE)  
45  
46 635 is an innovative peer reviewed, science methods journal in which its articles are a unique blend  
47  
48 636 of the conventional printed article with professionally produced videography. Ecotoxicology  
49  
50 637 methods articles have begun to be published in this format (Calfee et al. 2016; van Iersel et al.  
51  
52 638 2014). The field would benefit from better exploiting new visualization techniques to document  
53  
54  
55  
56  
57  
58  
59  
60

Review draft – not for distribution or attribution

1  
2  
3 639 new methods and to improve education and training on techniques that need to be highly  
4  
5 640 standardized to be repeatable. At the minimum, with the availability of electronic data  
6  
7 641 repositories and supplemental information in journals, there is no reason why detailed methods  
8  
9 642 cannot be published.  
10  
11  
12  
13  
14  
15  
16  
17  
18  
19  
20  
21  
22  
23  
24  
25  
26  
27  
28  
29  
30  
31  
32  
33  
34  
35  
36  
37  
38  
39  
40  
41  
42  
43  
44  
45

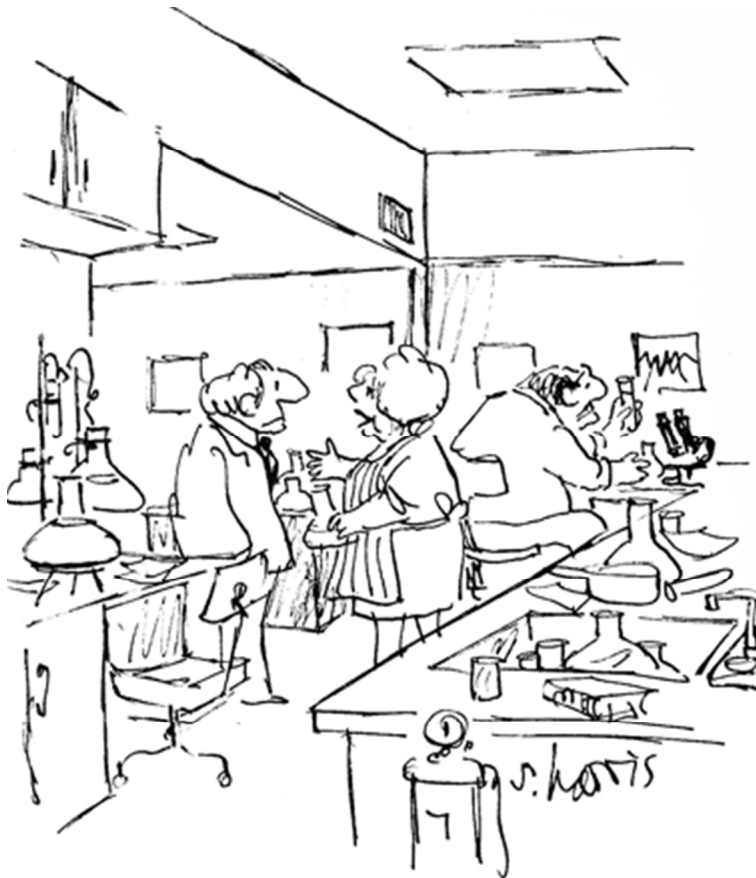

643  
644  
645  
646  
647  
648  
649  
650  
651  
652  
653  
654  
655  
656  
657  
658  
659  
660

644 **Figure 3.** Large environmental chemistry and toxicology laboratories that use standard methods to produce results  
645 that may be submitted to regulatory agencies usually have a well-established quality management structure.  
646 Quality management in academic research laboratories focused on novel methods may be more ad hoc,  
647 especially if the research work force is dominated by transient scientists, such as students or those on short-term  
648 postgraduate appointments (Credit: Sidney Harris, sciencecartoonsplus.com).



*Review draft – not for distribution or attribution*

1  
2  
3 649  
4  
5  
6 650 Reproducing a statistical summary or model run reported in a scientific publication when the  
7  
8 651 underlying data and code are provided and explained is one thing. Reproducing an actual  
9  
10 652 complex experiment is hard and is rarely attempted, unless perhaps the results are novel and have  
11  
12 653 a high regulatory or societal impact. Even under the best of circumstances, such as when the  
13  
14 654 original researchers are diligent enough to repeat an experiment in the same lab with as close to  
15  
16 655 identical methods as they could manage, it can be difficult or impossible to produce the same  
17  
18 656 result twice (Owen et al. 2010). Nosek and Errington (2017) caution that if investigator #2  
19  
20 657 reports that the results of study #1 could not be reproduced, that does not indicate which is more  
21  
22 658 credible: result #1, #2, neither, or both. Further, much of the “reproducibility” debate in the  
23  
24 659 natural sciences is focused on cell biology or human behavior (psychology) experiments, which  
25  
26 660 may be more tractable to reproducibility studies than messy environmental observational or  
27  
28 661 experimental studies. Especially with complex biological testing such as multi-generation tests, a  
29  
30 662 green thumb husbandry factor may bring together art and science to environmental chemistry  
31  
32 663 and toxicology. Subtle methods differences, strain differences or stochastic events can be so  
33  
34 664 puzzling that investigators are left thinking demons must have snuck into their study and  
35  
36 665 interfered with one treatment but not others (Hurlbert 1984). (We note that Hurlbert’s (1984)  
37  
38 666 suggestions for exorcisms or human sacrifice for troubleshooting suspected demonic intrusions,  
39  
40 667 might run afoul of contemporary institutional review board policies.)  
41  
42  
43  
44  
45  
46  
47

48 668 Still, reproducibility is a core tenet of science and successful reproduction adds confidence in  
49  
50 669 the credibility of novel findings. Divergent but individually credible results may further advance  
51  
52 670 the science by illuminating important aspects missed in the initial study (Owen et al. 2010). If for  
53  
54 671 instance, an investigator were to find a novel, major adverse effect of a class of chemicals to a  
55  
56  
57

*Review draft – not for distribution or attribution*

1  
2  
3 672 previously untested taxonomic group, then other equally diligent investigators should be able  
4  
5 673 produce similar effects in other research settings, even if the test conditions were only similar. A  
6  
7  
8 674 standalone paper from the 1970s that a snail was anomalously sensitive to Pb was skeptically  
9  
10 675 regarded. Over 30 years later, this open-minded skepticism led to follow-on studies from a new  
11  
12 676 generation of scientists that not only affirmed the unusual early report of sensitivity but also led  
13  
14  
15 677 to important advances in comparative physiology and underlying mechanisms of toxicity (Brix et  
16  
17 678 al. 2012). Similarly, early reports that freshwater mussels and other mollusks were unusually  
18  
19 679 sensitive to ammonia were not widely persuasive. After repeated studies across multiple  
20  
21  
22 680 laboratories and species showed similar findings, the issue gained traction with standardized  
23  
24 681 method development, inter-laboratory round robin testing, and attention by environmental  
25  
26 682 managers (Farris and Hassel 2006; USEPA 2013).

27  
28  
29 683 Individual investigators may not always have the opportunities for self-replication, but best  
30  
31 684 practices call for repeating what one can (Harris and Sumpter 2015). In field studies, multiple  
32  
33 685 measures of exposure, multiple years of field data, and so on give credence to findings. We  
34  
35  
36 686 recognize that all science has practical resource limits and we are not going as far as arguing that  
37  
38 687 novel findings from small sample studies should never be published. Rather, the appropriate  
39  
40 688 conclusion from such studies is along the lines of “if these findings turn out to be repeatable,  
41  
42 689 they could be an important development.” In our view, novel, major findings that are supported  
43  
44  
45 690 only by a one-off study are best regarded as tentative.

Review draft – not for distribution or attribution

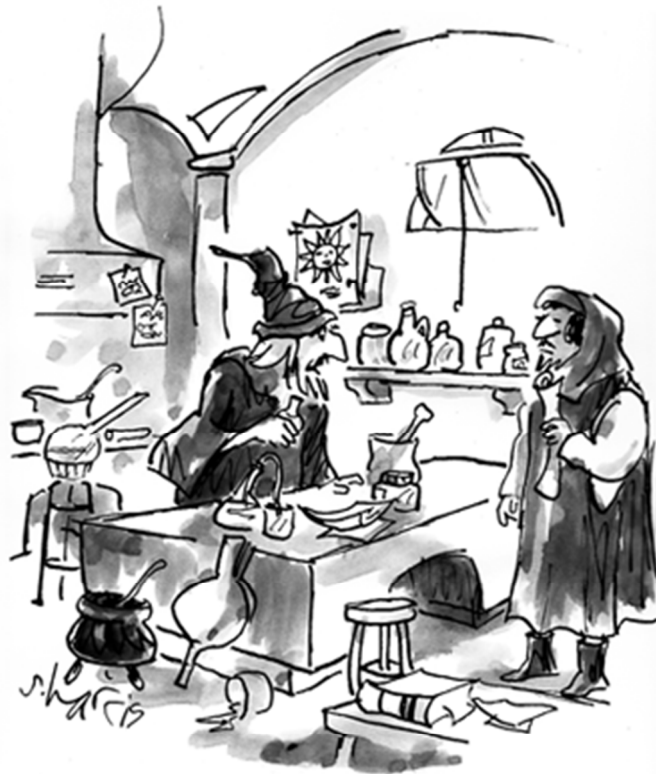

"OF COURSE YOU CAN'T REPLICATE MY EXPERIMENT.  
THERE'S A SECRET INCANTATION THAT YOU HAVE TO CHANT,  
AND I'M NOT TELLING IT TO ANYONE."

691

692 **Figure 4.** The brief methods descriptions in journal articles are seldom sufficient to be reproducible by others.

693 Step-by-step video documentation of experimental protocols can be published as video articles, uploaded to  
694 online repositories, or published as supplemental information. Video protocols are underutilized in environmental  
695 toxicology (Credit: Sidney Harris, Sciencecartoonsplus.com).

### 696 *Transparency*

697 Transparency in reporting research, including all the relevant underlying data that were relied  
698 upon in the paper, has become a critical element of integrity in science. Science's claim to self-  
699 correction and overall reliability is based on the ability of researchers to replicate the results of  
700 published studies (Nosek and 39 co-authors 2015). Studies cannot be replicated if scientists will  
701 not share additional data, information, or materials from published studies, and we believe that

*Review draft – not for distribution or attribution*

1  
2  
3 702 upholding such ethical norms is every scientist's responsibility. The embrace of the principle of  
4  
5 703 transparent reporting has been uneven across disciplines, and the field of ecotoxicology has  
6  
7 704 certainly not distinguished itself as a leader in this regard (McNutt et al. 2016; Meyer and  
8  
9 705 Francisco 2013; Parker et al. 2016; Schäfer et al. 2013; Womack 2015).

10  
11  
12  
13 706 Researchers in ecotoxicology and environmental chemistry have long only presented highly  
14  
15 707 reduced data summaries. The only “data” included in some publications are crowded figures and  
16  
17 708 tables with results of statistical outputs, such as F- values, effects concentration point estimates  
18  
19 709 (EC50, EC10, etc.), or no-and lowest-observed effects concentrations (NOECs, LOECs). These  
20  
21 710 derived values are not data. Such data-poor publications essentially represent an implicit claim  
22  
23 711 by the researcher to “*trust us, we know what we’re doing, our interpretation of the data is the*  
24  
25 712 *only appropriate interpretation, you don’t need to see what you don’t see, and besides it’s our*  
26  
27 713 *data to share as we see fit.*” Such attitudes reflect the norm in scientific publishing prior to the  
28  
29 714 early 2000s, in which strict page limits and word limits precluded authors “wasting” space  
30  
31 715 publishing data tables. With the provisions for electronic supplemental material beginning in the  
32  
33 716 2000s, and dedicated data repositories becoming widely available at low or no costs to authors in  
34  
35 717 the 2010s, these reasons for opaque publication are no longer justified. Researchers who choose  
36  
37 718 not to transparently report the actual data underlying their scientific findings may have other  
38  
39 719 reasons for doing so. They may be concerned about others scooping them on their own data  
40  
41 720 (McNutt 2016), although counterintuitively, publishing data may actually help establish priority  
42  
43 721 and reduce scooping concerns (Laine 2017). Other less charitable reasons why researchers might  
44  
45 722 resist publishing data include that they haven’t devoted the needed time to organize their data in  
46  
47 723 a coherent fashion that is interpretable by others, because reported results might not be replicable  
48  
49 724 from the underlying data, they are not keen to facilitate alternate statistical analyses or  
50  
51  
52  
53  
54  
55  
56  
57  
58  
59  
60

*Review draft – not for distribution or attribution*

1  
2  
3 725 interpretations of their data, that they wish to publish unfalsifiable findings, or because there's  
4  
5 726 simply less there than they led readers to believe (Smith and Roberts 2016).  
6  
7

8 727 Data sharing may still be regarded more as an imposition from science funders to be complied  
9  
10 728 with rather than as a universal principle embraced by those conducting and publishing scientific  
11  
12 729 research (Collins and Verdier 2017; European Commission 2016; Holdren 2013; Nelson 2009;  
13  
14 730 Nosek and 39 co-authors 2015). There are many pragmatic obstacles to effective data sharing,  
15  
16 731 such as the expertise, extra work, and costs to researchers to organize, serve, and preserve their  
17  
18 732 data in a comprehensible manner, privacy and anonymity concerns for environmental data  
19  
20 733 collected from private property, about human subjects, and balancing intellectual property  
21  
22 734 concerns. Some environmental science research is intended to be secret, such as mining and  
23  
24 735 economic geology, agricultural chemical product development, and innumerable other corporate  
25  
26 736 research efforts which are intended to develop products and recoup investments<sup>2</sup>. However, in  
27  
28 737 our view, researchers on such ventures cannot have it both ways, by publishing some outcomes  
29  
30 738 in the peer reviewed literature, but withholding the supporting data as private.  
31  
32  
33  
34  
35

36 739 Most environmental science journals have policies encouraging and facilitating data sharing.  
37  
38 740 SETAC journals are probably typical in requiring a statement by the authors' whether and how  
39  
40 741 the data underlying their analyses are available, with an admonition that authors should share  
41  
42 742 upon request. A passable statement may be something as weak as "*Contact the Corresponding*  
43  
44 743 *Author for data availability.*"  
45  
46  
47

48 744 The strongest data disclosure policy for journals publishing in the environmental sciences is  
49  
50 745 probably that developed for the Public Library of Science (PLOS) family of journals. "*PLOS*  
51  
52  
53  
54

---

55 <sup>2</sup> (see however, a recent corporate initiative to make available traditionally protected crop safety information  
56 <https://cropscience-transparency.bayer.com/> ).  
57

*Review draft – not for distribution or attribution*

1  
2  
3 746 *journals require authors to make all data underlying the findings described in their manuscript*  
4  
5 747 *fully available without restriction, with rare exception”* (PLOS 2014). Exceptions are limited to  
6  
7  
8 748 privacy or vulnerability concerns such as data on human research subjects that could not be fully  
9  
10 749 anonymized, locations of archeological, fossil, or endangered species, that could be exploited or  
11  
12 750 damaged, or safety and security considerations. Penalties for authors who fail to comply include  
13  
14 751 rejection, or if they decline to provide data for an already published article, the editors could flag  
15  
16  
17 752 their article with a cautionary correction or even retract it (PLOS 2014). Whether PLoS’s stand  
18  
19 753 requiring authors to make available all data underlying their findings will lead other journals to  
20  
21 754 stiffen their resolve, or whether the comparatively lax policies of competing journals will  
22  
23  
24 755 undermine PLoS and other open-science advocates remains to be seen (Davis 2016; Nosek and  
25  
26 756 39 co-authors 2015).

27  
28  
29 757 The reality of moving toward transparent data availability and preservation is thus more  
30  
31 758 challenging and complicated than the notion that it should be done. To us is it a priority to  
32  
33 759 strongly encourage, for without data, the credibility of science cannot be evaluated. Some  
34  
35  
36 760 research has shown the willingness and ability for authors to share data declines significantly  
37  
38 761 with time, and having a weak data availability policy is only marginally better than having no  
39  
40 762 policy at all (Vines et al. 2014).

41  
42  
43 763 Rather than mandates, one simple incentive to improving openness in reporting has been for  
44  
45 764 journals to award prominent open data “badges” for articles verified as being supported by  
46  
47  
48 765 available, correct, usable, and complete data. By showing an open data badge on the issue table  
49  
50 766 of contents, article web page, and including a “verified open data” statement in the bibliographic  
51  
52 767 indexing metadata, articles without such badge endorsement may be seen as incomplete. Over  
53  
54  
55 768 time, this might shift the norm toward open preservation and sharing. In at least one journal, this

*Review draft – not for distribution or attribution*

1  
2  
3 769 approach appeared to markedly improve the sharing and preservation of data through linked,  
4  
5 770 independent repositories (Kidwell et al. 2016).  
6  
7

### 8 9 771 *Critical Reviews and Literature Syntheses*

10  
11 772 In ecotoxicology, published literature can roughly be broken down into two categories:  
12  
13 773 original research and the review article. The original research article usually is based upon field  
14  
15 774 observations, laboratory experiments, modelling, or blended approaches. Generalizing original  
16  
17 775 articles through reviews and syntheses are critical parts of the ecotoxicology and most  
18  
19 776 environmental science literature. Critical reviews, risk assessments, environmental quality  
20  
21 777 standards, are based on syntheses of the literature, and not on individual studies. Synthesis  
22  
23 778 articles have rather distinct scientific integrity problems from the original research article.  
24  
25 779 Decisions must be made on how studies were located, results categorized, and a host of data  
26  
27 780 manipulation and analyses decisions need to be made. These decisions and associated biases may  
28  
29 781 be deliberate and clearly explained or the analyst may not even recognize that they have made a  
30  
31 782 decision. In some cases we suspect analysts obscured their decisions. In some cases, data  
32  
33 783 synthesis may be highly structured, with clearly defined criteria for data inclusion (Hobbs et al.  
34  
35 784 2005), and search strategies. Others may follow the winding path of the present article:  
36  
37 785 discussions among the authors “*have you read so-and-so?*”, and readings that led to other  
38  
39 786 relevant material through forward and backward citing, along with by some specific subject  
40  
41 787 searches. This path led to much relevant and thoughtful material across many disciplines. But it  
42  
43 788 was hardly systematic or reproducible.  
44  
45  
46  
47  
48  
49  
50

51 789 Literature searches from different sources can yield very different results. For example, using  
52  
53 790 a 2007 original research article on population modeling of selenium toxicity to trout (Van Kirk  
54  
55 791 and Hill 2007), four leading bibliographic indexing services were searched for articles citing that

*Review draft – not for distribution or attribution*

1  
2  
3 792 study. Web of Science (WoS), Elsevier’s Scopus, Digital Science’s Dimensions, and Google  
4  
5 793 Scholar found 7, 10, 15, and 22 citing publications respectively. Scopus found all articles found  
6  
7 794 by WoS, plus articles in *Human and Ecological Risk Assessment* and *IEAM*. Google Scholar  
8  
9 795 found all articles found by Scopus plus articles in *Ecotoxicology Modeling*, *Water Resources*  
10  
11 796 *Research*, 3 government reports, 2 books, a thesis, a conference proceeding, a duplicate, and 2  
12  
13 797 ambiguous citations from grey regulatory documents. It follows from this 3 fold difference in  
14  
15 798 valid citations to an article that a critical review of published literature on a topic or a regulatory  
16  
17 799 assessment could miss relevant science if the assessors relied too heavily on a single search  
18  
19 800 provider.

20  
21  
22  
23  
24 801 This simple example was from the current era of science, which began by 1996 or so,  
25  
26 802 depending on which bibliographic indexing service scholars are using. Web sites for WoS and  
27  
28 803 Scopus respectively report their indexing databases are reliable from 1971 and 1996 forward.  
29  
30 804 Relying exclusively on bibliographic index searching may omit important, relevant older  
31  
32 805 research.

33  
34  
35  
36 806 Thus we have the indexing bias problem in meta-analyses and assessment (that not indexed  
37  
38 807 won’t be retrieved), and the related problem of reviewing the secondary source but citing the  
39  
40 808 original. We have seen assessments that omitted seminal research published before the current  
41  
42 809 digital era, which may reflect indexing bias. Ecotoxicology syntheses often rely on variations of  
43  
44 810 species-sensitivity distributions, which may provide more explanations of statistical  
45  
46 811 characteristics of the datasets, data extrapolations, transformations, normalizations, than on  
47  
48 812 where the data came from in the first place. We have seen micrograms and milligrams mixed up,  
49  
50 813 and statistical rankings that commingled endpoints such as time to death in hours with effects  
51  
52 814 concentrations. Some of these issues are undoubtedly related to the online availability of well  
53  
54  
55  
56  
57  
58  
59  
60



*Review draft – not for distribution or attribution*

1  
2  
3 815 curated databases such as ECETOC Aquatic Toxicity (EAT) Database from the European Center  
4  
5 816 for Ecotoxicology and Toxicology of Chemicals or the U.S. Environmental Protection Agency’s  
6  
7  
8 817 EcoTox databases. These compiled databases are valuable resources but reliance on secondary,  
9  
10 818 compilations deprive the original authors of credit via citations. At least for publicly funded  
11  
12 819 science, citations may be a way that authors demonstrate the value of their work to the scientific  
13  
14 820 community, and thus build the case for further funding. Further, reliance on secondary sources is  
15  
16  
17 821 a good way to introduce or repeat inaccuracies (Rekdal 2014). We echo previous calls for better  
18  
19 822 training and rigor when conducting and reporting secondary analyses of ecotoxicology and  
20  
21 823 related literature. Practices from other fields, such as the Cochrane systematic review approach  
22  
23  
24 824 and guidelines for the ethical reuse of data could be adapted to the ecotoxicology practices (Duke  
25  
26 825 and Porter 2013; Roberts et al. 2006; Suter and Cormier 2015a).  
27  
28

## 29 826 **Advocacy**

31  
32 827 Science is the enterprise for answering questions and making predictions about the how the  
33  
34 828 universe works, but science can never answer “should” questions. For example, science cannot  
35  
36  
37 829 tell societies whether they should restrict chemical uses and releases, whether natural preserves  
38  
39 830 should be set aside from human exploitation, or whether biodiversity should be protected. These  
40  
41 831 are among the myriad value judgements that societies must make, and while science can support  
42  
43  
44 832 societies in making these choices through predictions founded upon a body of knowledge, there  
45  
46 833 are never “scientifically correct” answers to questions of human values, morals, and ethics  
47  
48 834 (Snyder and Hooper-Bui 2018). Scientists are humans, and like all people, hold ethical and moral  
49  
50  
51 835 values which drive assumptions which may not be explicitly stated if even recognized. For  
52  
53 836 example, the notion of “environmental protection” in the environmental toxicology field is  
54  
55 837 rooted in societal norms, statutes, and international agreements with goals of minimizing harm (a  
56  
57  
58  
59  
60

*Review draft – not for distribution or attribution*

1  
2  
3 838 human concept) from activities such as extraction, manufacture, use, and disposal of chemical  
4  
5 839 products. Scientists in the field develop informed opinions toward the “should” questions  
6  
7  
8 840 relating to their experiences, which leads to questions of whether and how scientists advocate for  
9  
10 841 “should” questions.  
11

12  
13 842 The underpinnings of science are that researchers have no vested interest in the results of their  
14  
15 843 observations, that they objectively record and analyze these results, and that they fairly report the  
16  
17 844 outcomes in the peer-reviewed literature. Advocacy can compromise these underpinnings, at the  
18  
19 845 cost of scientists’ credibility (Fenn and Milton 1997). Scientists tend to be passionate about their  
20  
21 846 science, which has led to controversy over the role that scientists should play in related public  
22  
23 847 policy debates. While we think most scientists would agree that advocacy for science having a  
24  
25 848 role in environmental policy debates is appropriate, there is likely much less agreement whether  
26  
27 849 it is appropriate for scientists to advocate for particular outcomes in policy debates. If the policy  
28  
29 850 debate turns on questions of science central to a scientist’s particular area of study, probably no  
30  
31 851 one is better positioned than that scientist to lay out the evidence for or against a particular  
32  
33 852 course of action. If the scientist is regarded as a neutral and informed voice, their advice may be  
34  
35 853 valued by all sides in a policy dispute (Sedlak 2016). However, if the scientist’s experience or  
36  
37 854 analyses leads them to the strong conviction that one policy direction is more correct and should  
38  
39 855 be adopted, then they are no longer a neutral broker and have become an advocate.  
40  
41  
42  
43  
44

45 856 Policy advocacy is potentially problematic because it may compromise use of research  
46  
47 857 findings in policy and management deliberations if the information is not viewed as credible by  
48  
49 858 all sides (Scott et al. 2007). In some situations, advocacy is beyond reproach, such as a university  
50  
51 859 scientist who uncovered a lead poisoned community water system. Simply reporting his findings  
52  
53 860 to the responsible officials would have been ineffective, if the ineptitude or indifference of those  
54  
55  
56  
57  
58  
59  
60

*Review draft – not for distribution or attribution*

1  
2  
3 861 same responsible officials contributed to the situation in the first place (Sedlak 2016). However,  
4  
5 862 not all situations are so clear cut, and reasonable people who share similar motivations, skills,  
6  
7 863 and agree that researchers should do the right thing may not agree on what that is. Deliberations  
8  
9 864 on major environmental issues are complex and science may only be one element of the  
10  
11 865 deliberations. Developing and providing technical and scientific information to inform policy  
12  
13 866 deliberations in an objective and relevant way is formidable challenge that is easily undermined  
14  
15 867 when scientists meld their own policy preferences into their scientific advice (Lackey 2007).  
16  
17  
18  
19

20 868 Institutional constraints aside, how scientists balance these competing issues and choose when  
21  
22 869 or whether to engage in advocacy is a deeply personal choice and is situational. However, just as  
23  
24 870 science journals discourage comingling original research results and commentary, scientists  
25  
26 871 should keep science and advocacy distinct in their publications and speaking. In particular, we  
27  
28 872 argue that scientists should be watchful for stealth policy advocacy. Stealth advocacy is the use  
29  
30 873 of value-laden language in scientific writing that assumes a policy preference (Lackey 2007).  
31  
32 874 Rather than openly disclosing assumed values or policy preferences, biases may be  
33  
34 875 unconsciously (or deliberately) cloaked through normative science. Normative science is science  
35  
36 876 developed, presented, or interpreted all based on an assumed, usually unstated, preference for a  
37  
38 877 particular policy or class of policy choices. This covert advocacy may be reflected in word  
39  
40 878 choices, and such advocacy is not always apparent even to the advocate. For instance, value-  
41  
42 879 laden words such as *impacted*, *degraded*, *improved*, *good*, and *poor* may be used to describe  
43  
44 880 habitats or other environmental features. Less value-laden words would be *exposed*, *altered*,  
45  
46 881 *changed*, *increased*, or *decreased*. The use of normative science is potentially insidious because  
47  
48 882 the tacit, usually unstated, preference for a particular policy or class of policy choices is not  
49  
50 883 perceptibly normative to policy makers or even to many scientists (Lackey 2007). Criticisms of  
51  
52  
53  
54  
55  
56  
57  
58  
59  
60

*Review draft – not for distribution or attribution*

1  
2  
3 884 normative science can be too extreme, as taken literally, the entire discipline of conservation  
4  
5 885 biology could be considered too normative. Similarly, the mission statement of SETAC “to  
6  
7 886 *support the development of principles and practices for protection, enhancement and*  
8  
9 887 *management of sustainable environmental quality and ecosystem integrity*” could be too much  
10  
11 888 for some. Science is normative. Areas of study or techniques once considered appropriate areas  
12  
13 889 of science inquiry such as craniometry, eugenics, or experimentation on human subjects without  
14  
15 890 informed consent are no longer considered to be within the norms of ethical science. Within  
16  
17 891 environmental toxicology, pressure to reduce the use of animal testing might be an example of  
18  
19 892 normative science.  
20  
21  
22  
23

24 893 Our point is not to argue for or against scientists engaging in overt policy advocacy, which is  
25  
26 894 a personal decision, but for clarity and transparency. Just as original results, opinion, judgements  
27  
28 895 and speculation should not be blended in a scientific paper, science and advocacy need some  
29  
30 896 separation (Scott and Rachlow 2011). Covert advocacy is a form of bias. Environmental  
31  
32 897 scientists should clearly differentiate between research findings and policy advocacy based upon  
33  
34 898 those findings.  
35  
36  
37  
38

### 39 899 **Weaponizing scientific integrity**

40  
41  
42 900 We recognize that “scientific integrity” discussions could easily be diminished to going down  
43  
44 901 the path carved by “sound science” strategic initiatives, which often boiled down to campaigns to  
45  
46 902 call “*my science good science and your science junk*” (Doremus 2007; Kapustka 2016; McGarity  
47  
48 903 2003). The goal may be to recast policy, ideological, or economic disputes as doubt or created  
49  
50 904 conflicts in science. In countries with a tort-based, adversarial legal system for resolving injuries  
51  
52 905 or damages, science-based information becomes just another tool for dueling experts, who often  
53  
54 906 have primary responsibility for advocating for the interests of their client (Wagner 2005).  
55  
56  
57  
58  
59  
60

*Review draft – not for distribution or attribution*

1  
2  
3 907 Research integrity policies or requirements for data transparency can be used as weapons to bury  
4  
5 908 public university or government scientists with vexatious, intrusive, and costly demands for  
6  
7 909 records such as raw laboratory notebooks, instrument calibration records, emails between  
8  
9  
10 910 coauthors, working drafts, and peer comments and responses. Such demands can be effective  
11  
12 911 tools for interfering with the work of public-sector scientists, including academics in public  
13  
14 912 institutions (Folta 2015; Halpern and Mann 2015; Kloor 2015; Kollipara 2015; Lewandowsky  
15  
16 913 and Bishop 2016), or academics in private institutions but who receive research support from  
17  
18 914 public sources (Hey and Chalmers 2010; Shrader-Frechette 2012). Privately funded research is  
19  
20 915 generally shielded from such practices (Brain et al. 2016; Wagner and Michaels 2004).  
21  
22  
23 916 Researchers at private institutions may however be subject to baseless litigation to intimidate  
24  
25 917 scientists and deter others by inflicting long and costly legal processes, disruption, and threats of  
26  
27 918 personal financial liability. Such harassing lawsuits have been employed often enough to get a  
28  
29 919 name, SLAPP (Strategic Litigation Against Public Participation) suits (Johnson 2007; Nature  
30  
31 920 Medicine Editors 2017). While legal, such strategies represent detrimental practices cloaked in  
32  
33 921 the vernacular of science (Johnson 2007; Levy and Johns 2016; McGarity and Wagner 2012;  
34  
35 922 Wagner and Michaels 2004).  
36  
37  
38  
39  
40  
41 923  
42  
43

#### 924 **Promoting scientific integrity in environmental toxicology**

45  
46 925 Scientific integrity is harnessed by high quality environmental research characterized by rigor,  
47  
48 926 relevance, reproducibility, and objectivity. Our review suggested several conclusions, tangible  
49  
50 927 actions and less tangible directions that professional societies such as SETAC could do to  
51  
52 928 encourage scientists, their supporting institutions, and science journals to maintain and improve  
53  
54 929 science integrity. Scientific integrity is reinforced through full transparency exemplified by full  
55  
56  
57  
58  
59  
60

*Review draft – not for distribution or attribution*

- 1  
2  
3 930 disclosures of potential conflicting and competing interests that could contribute to bias, and by  
4  
5 931 making all data and observations readily accessible. Specifically:  
6  
7  
8 932 1. Scientific integrity in ecotoxicology and the environmental sciences cannot be ensured by  
9  
10 933 impeccable policies or checklists. It is an attitude to be embraced, maintained, and  
11  
12 934 enforced through the support, guidance and approval of one's peers through a community  
13  
14 935 of practices.  
15  
16  
17 936 2. Reliability, rigor, relevance and reproducibility of science are more important than novel  
18  
19 937 advances.  
20  
21  
22 938 3. Increased attention to a culture of quality management training and transparency could  
23  
24 939 improve the confidence in published findings.  
25  
26  
27 940 4. Studies that are not supported by primary data released through data repositories or  
28  
29 941 detailed supporting information are not fully credible.  
30  
31 942 5. As a community, be aware of and disclose potential conflicting or competing interests  
32  
33 943 that could contribute to bias; avoid and not tolerate extreme conflicts or bias.  
34  
35  
36 944 6. Distinguish true uncertainties in science from economic, policy, or social implications of  
37  
38 945 the science, and call out those who would conflate them.  
39  
40  
41 946 7. Discourage judging science by its funder; rather, open-minded skepticism is applicable  
42  
43 947 when the funder has a stake in the outcome of a study.  
44  
45 948 8. Scientists, like all people, have moral and ethical assumptions, based upon their values.  
46  
47 949 These should not be intermixed with their interpretations and reporting of science. If  
48  
49 950 scientists' values lead them to cross the lines from analysis to advocacy, they need to be  
50  
51 951 particularly careful about distinguishing between science, values, assumptions, and  
52  
53  
54 952 opinion.  
55  
56  
57  
58  
59  
60

*Review draft – not for distribution or attribution*

- 1  
2  
3 953 9. Professional societies such as SETAC have an important role in fostering respectful  
4  
5 954 evidence-based dialog, in meetings and correspondence on published works.  
6  
7  
8 955 10. Professional societies such as SETAC could support a standing training seminar on  
9  
10 956 principles of scientific integrity, the transparent conduct of science and best practices for  
11  
12 957 peer review in conjunction with its annual meetings.  
13  
14 958 11. Professional societies such as SETAC have a valuable role in facilitating balanced, expert  
15  
16  
17 959 reviews of controversial science topics, such as has been done with their Pellston  
18  
19 960 Workshop series of meetings and publications.  
20  
21  
22 961

## 23 24 25 962 **Acknowledgements**

26  
27  
28 963 This commentary and perspectives followed discussions by the Society of Environmental  
29  
30 964 Toxicology and Chemistry (SETAC) ad hoc subcommittee on Scientific Integrity (Fairbrother  
31  
32 965 2016). No funding was provided for the writing of this manuscript. Author affiliations are given  
33  
34 966 for identification, but do not necessarily imply endorsement. Further, the views are those of the  
35  
36  
37 967 authors and are not intended to represent those of SETAC. Author affiliations reflect a variety of  
38  
39 968 academic, business, and governmental affiliations, and all authors have competing interests from  
40  
41  
42 969 our previous experiences and work environments, but hopefully these were somewhat balanced  
43  
44 970 out. No financial conflicts of interest were declared by any author.  
45  
46

## 47 971 **References**

- 48  
49  
50 972 AAAS. 2000. The Role and Activities of Scientific Societies in Promoting Research Integrity. April 10-  
51  
52 973 11, 2000. American Association for the Advancement of Science (AAAS) and the 24 pp.  
53  
54 974 <https://www.aaas.org/page/scientific-integrity>.

Review draft – not for distribution or attribution

- 1  
2  
3 975 Alberts, B. 2012. Editor's note [A bacterium that can grow using arsenic instead of phosphorus]. *Science*.  
4  
5 976 334(6034): 1149. <http://dx.doi.org/10.1126/science.1208877>  
6  
7 977 ARC. 2007. Australian Code for the Responsible Conduct of Research. Australian Research Council  
8  
9 978 (ARC). <http://www.arc.gov.au/research-integrity>.  
10  
11 979 Arciszewski, T.J. and K.R. Munkittrick. 2015. Development of an adaptive monitoring framework for  
12  
13 980 long-term programs: An example using indicators of fish health. *Integrated Environmental*  
14  
15 981 *Assessment and Management*. 11(4): 701-718. <http://dx.doi.org/10.1002/ieam.1636>  
16  
17 982 Atkinson, R.L. and I. Macdonald. 2010. White hat bias: The need for authors to have the spin stop with  
18  
19 983 them. *International Journal of Obesity*. 34(1): 83-83. <http://dx.doi.org/10.1038/ijo.2009.269>  
20  
21 984 Augspurger, T. 2014. SETAC Hosts Successful TSCA [Toxic Substances Control Act] Risk Assessment  
22  
23 985 Science Seminar for Congressional Staff (6 November 2014). *SETAC Globe*. 15(11)  
24  
25 986 Aviv, R., 2014, A valuable reputation (February 10, 2014), *The New Yorker* at  
26  
27 987 <http://www.newyorker.com/magazine/2014/02/10/a-valuable-reputation>.  
28  
29 988 Baba, A., D.M. Cook, T.O. McGarity, and L.A. Bero. 2005. Legislating “Sound Science”: The Role of  
30  
31 989 the Tobacco Industry. *American Journal of Public Health*. 95(S1): S20-S27.  
32  
33 990 <http://dx.doi.org/10.2105/AJPH.2004.050963>  
34  
35 991 Baethge, C. 2013. The effect of a conflict of interest disclosure form using closed questions on the  
36  
37 992 number of positive conflicts of interest declared – a controlled study. *PeerJ*. 1: e128.  
38  
39 993 <http://dx.doi.org/10.7717/peerj.128>  
40  
41 994 Baker, M. 2016a. 1,500 scientists lift the lid on reproducibility. *Nature*. *Nature*.  
42  
43 995 <http://dx.doi.org/10.1038/533452a>  
44  
45 996 Baker, M. 2016b. How quality control could save your science. *Nature*. 529: 456–458.  
46  
47 997 <http://dx.doi.org/10.1038/529456a>  
48  
49 998 Bernhardt, E.S., E.J. Rosi, and M.O. Gessner. 2017. Synthetic chemicals as agents of global change.  
50  
51 999 *Frontiers in Ecology and the Environment*. 15(2): 84-90. <http://dx.doi.org/10.1002/fee.1450>  
52  
53  
54  
55  
56  
57  
58  
59  
60



Review draft – not for distribution or attribution

- 1  
2  
3 1000 Bes-Rastrollo, M., M.B. Schulze, M. Ruiz-Canela, and M.A. Martinez-Gonzalez. 2014. Financial  
4  
5 1001 Conflicts of Interest and Reporting Bias Regarding the Association between Sugar-Sweetened  
6  
7 1002 Beverages and Weight Gain: A Systematic Review of Systematic Reviews. *PLOS Medicine*.  
8  
9 1003 10(12): e1001578. <http://dx.doi.org/10.1371/journal.pmed.1001578>  
10  
11 1004 Blumenstyk, G. 2007. When Research Criticizes an Industry. *Chronicle of Higher Education*. 54(4): A21  
12  
13 1005 Boden, L.I. and D. Ozonoff. 2008. Litigation-Generated Science: Why Should We Care? *Environmental*  
14  
15 1006 *Health Perspectives*. 116(1): 117-122  
16  
17 1007 Bohannon, J. 2013. Who's Afraid of Peer Review? *Science*. 342(6154): 60-65.  
18  
19  
20 1008 <http://dx.doi.org/10.1126/science.342.6154.60>  
21  
22 1009 Boone, M.D., C.A. Bishop, L.A. Boswell, R.D. Brodman, J. Burger, C. Davidson, M. Gochfeld, J.T.  
23  
24 1010 Hoverman, L.A. Neuman-Lee, R.A. Relyea, J.R. Rohr, C. Salice, R.D. Semlitsch, D. Sparling,  
25  
26 1011 and S. Weir. 2014. Pesticide Regulation amid the Influence of Industry. *BioScience*. 64(10): 917-  
27  
28 1012 922. <http://dx.doi.org/10.1093/biosci/biu138>  
29  
30 1013 Bornstein-Forst, S.M. 2017. Establishing Good Laboratory Practice at Small Colleges and Universities.  
31  
32 1014 *Journal of Microbiology & Biology Education*. 18(1): 18.1.10.  
33  
34 1015 <http://dx.doi.org/10.1128/jmbe.v18i1.1222>  
35  
36 1016 Borrell, B. 2009. National Academy as *National Enquirer*? PNAS Publishes Theory That Caterpillars  
37  
38 1017 Originated from Interspecies Sex. *Scientific American*. August 24, 2009  
39  
40 1018 Brain, R., J. Stavelly, and L. Ortego. 2016. In Response: Resolving the perception of bias in a discipline  
41  
42 1019 founded on objectivity—A perspective from industry. *Environmental Toxicology and Chemistry*.  
43  
44 1020 35(5): 1070-1072. <http://dx.doi.org/10.1002/etc.3357>  
45  
46 1021 Brix, K.V., D.K. DeForest, and W.J. Adams. 2011. The sensitivity of aquatic insects to divalent metals: A  
47  
48 1022 comparative analysis of laboratory and field data. *Science of the Total Environment*. 409(20):  
49  
50 1023 4187-4197. <http://dx.doi.org/10.1016/j.scitotenv.2011.06.061>  
51  
52  
53  
54  
55  
56  
57  
58  
59  
60

Review draft – not for distribution or attribution

- 1  
2  
3 1024 Brix, K.V., A.J. Esbaugh, K.M. Munley, and M. Grosell. 2012. Investigations into the mechanism of lead  
4  
5 1025 toxicity to the freshwater pulmonate snail, *Lymnaea stagnalis*. *Aquatic Toxicology*. 106–107(0):  
6  
7 1026 147-156. <http://dx.doi.org/10.1016/j.aquatox.2011.11.007>  
8  
9 1027 Bui, C., R. Parrish, M. Meredith, and J. Giddings, editors. 2004. *A History of SETAC Part 1: The*  
10  
11 1028 *Beginning*. SETAC Press, Pensacola, FL, 36 pp  
12  
13 1029 Burton, G.A., R. Di Giulio, D. Costello, and J.R. Rohr. 2017. Slipping through the Cracks: Why is the  
14  
15 1030 U.S. Environmental Protection Agency Not Funding Extramural Research on Chemicals in Our  
16  
17 1031 Environment? *Environmental Science & Technology*. 51(2): 755-756.  
18  
19 1032 <http://dx.doi.org/10.1021/acs.est.6b05877>  
20  
21 1033 Burton, G.A. and C.H. Ward. 2012. Editorial preface [letters to the editor on the Exxon Valdez oil spill  
22  
23 1034 and pink salmon]. *Environmental Toxicology and Chemistry*. 31(3): 469-469.  
24  
25 1035 <http://dx.doi.org/10.1002/etc.1741>  
26  
27 1036 Buys, D.J., A.R. Stojak, W. Stiteler, and T.F. Baker. 2015. Ecological risk assessment for residual coal fly  
28  
29 1037 ash at Watts Bar Reservoir, Tennessee: Limited alteration of riverine-reservoir benthic  
30  
31 1038 invertebrate community following dredging of ash-contaminated sediment. *Integrated*  
32  
33 1039 *Environmental Assessment and Management*. 11(1): 43-55. <http://dx.doi.org/10.1002/ieam.1577>  
34  
35 1040 Calfee, R.D., H.J. Puglis, E.E. Little, W.G. Brumbaugh, and C.A. Mebane. 2016. Quantifying Fish  
36  
37 1041 Swimming Behavior in Response to Acute Exposure of Aqueous Copper Using Computer  
38  
39 1042 Assisted Video and Digital Image Analysis. *Journal of Visualized Experiments*. (108): e53477.  
40  
41 1043 <http://dx.doi.org/doi:10.3791/53477>  
42  
43 1044 Callaway, E. 2015. Faked peer reviews prompt 64 retractions (18 August 2015). *Nature*.  
44  
45 1045 <http://dx.doi.org/10.1038/nature.2015.18202>. <http://dx.doi.org/10.1038/nature.2015.18202>  
46  
47 1046 Campbell, T. and J. Friesen. 2015. Why people "fly from facts": Research shows the appeal of untestable  
48  
49 1047 beliefs and how they lead to a polarized society (March 3, 2015). *Scientific American*.  
50  
51 1048 Collins, S.L. and J.M. Verdier. 2017. The Coming Era of Open Data. *BioScience*. 67(3): 191-192.  
52  
53 1049 <http://dx.doi.org/10.1093/biosci/bix023>  
54  
55  
56  
57  
58  
59  
60

Review draft – not for distribution or attribution

- 1  
2  
3 1050 Cope, M.B. and D.B. Allison. 2009. White hat bias: examples of its presence in obesity research and a  
4  
5 1051 call for renewed commitment to faithfulness in research reporting. *International Journal of*  
6  
7 1052 *Obesity*. 34(1): 84-88
- 9 1053 Couzin-Frankel, J. 2017. Firing of veteran NIH scientist prompts protests over publication ban (February  
10  
11 1054 22, 2017). *Science*. <http://dx.doi.org/10.1126/science.aal0808>
- 13 1055 Curfman, G.D., S. Morrissey, and J.M. Drazen. 2005. Expression of Concern: Bombardier et al.,  
14  
15 1056 “Comparison of Upper Gastrointestinal Toxicity of Rofecoxib and Naproxen in Patients with  
16  
17 1057 Rheumatoid Arthritis,” *N Engl J Med* 2000;343:1520-8. *New England Journal of Medicine*.  
18  
19 1058 353(26): 2813-2814. <http://dx.doi.org/doi:10.1056/NEJMe058314>
- 22 1059 Davis, P., 2016, *Scientific Reports On Track To Become Largest Journal In The World* (August 23,  
23  
24 1060 2016), *Scholarly Kitchen* at [https://scholarlykitchen.sspnet.org/2016/08/23/scientific-reports-on-](https://scholarlykitchen.sspnet.org/2016/08/23/scientific-reports-on-track-to-become-largest-journal-in-the-world/)  
25  
26 1061 [track-to-become-largest-journal-in-the-world/](https://scholarlykitchen.sspnet.org/2016/08/23/scientific-reports-on-track-to-become-largest-journal-in-the-world/).
- 28 1062 DeForest, D.K. and E.J. Van Genderen. 2012. Application of U.S. EPA guidelines in a bioavailability-  
29  
30 1063 based assessment of ambient water quality criteria for zinc in freshwater. *Environmental*  
31  
32 1064 *Toxicology and Chemistry*. 31(6): 1264–1272. <http://dx.doi.org/10.1002/etc.1810>
- 34 1065 Descamps, H. 2008. Natural resource damage assessment (NRDA) under the European Directive on  
35  
36 1066 Environmental Liability: a comparative legal point of view. *Océanis*. 32(3/4): 439-462
- 38 1067 Dixon, P.M. and J.H.K. Pechmann. 2005. A statistical test to show negligible trend. *Ecology*. 86(7):  
39  
40 1068 1751–1756. <http://dx.doi.org/10.1890/04-1343>
- 43 1069 Doremus, H. 2007. Scientific and Political Integrity in Environmental Policy. *Texas Law Journal*. 86:  
44  
45 1070 1601-1653
- 47 1071 Douglas, H. 2015. Politics and Science: Untangling Values, Ideologies, and Reasons. *The ANNALS of the*  
48  
49 1072 *American Academy of Political and Social Science*. 658: 296-306  
50  
51 1073 <http://dx.doi.org/10.1177/0002716214557237>

Review draft – not for distribution or attribution

- 1  
2  
3 1074 Douglas, H.E. 2014. Scientific Integrity in a politicized world. Pages 254-268 in P. Schroeder-Heister, G.  
4  
5 1075 Heinzmann, W. Hodges, and P. E. Bour, editors. *Logic, Methodology and Philosophy of Science*.  
6  
7 1076 *Proceedings of the Fourteenth International Congress (Nancy, France)*.  
8  
9 1077 Duke, C.S. and J.H. Porter. 2013. The ethics of data sharing and reuse in biology. *BioScience*. 63(6): 483-  
10  
11 1078 489. <http://dx.doi.org/10.1525/bio.2013.63.6.10>  
12  
13 1079 Edwards, M.A. and S. Roy. 2016. Academic Research in the 21st Century: Maintaining Scientific  
14  
15 1080 Integrity in a Climate of Perverse Incentives and Hypercompetition. *Environmental Engineering*  
16  
17 1081 *Science*. 34(1): 51-61. <http://dx.doi.org/10.1089/ees.2016.0223>  
18  
19 1082 Elliott, K.C. 2014. Financial conflicts of interest and criteria for research credibility. *Erkenntnis*. 79(5):  
20  
21 1083 917-937. <http://dx.doi.org/10.1007/s10670-013-9536-2>  
22  
23 1084 Elliott, K.C. 2016. Standardized Study Designs, Value Judgments, and Financial Conflicts of Interest in  
24  
25 1085 Research. *Perspectives on Science*. 24(5): 529-551. [http://dx.doi.org/10.1162/POSC\\_a\\_00222](http://dx.doi.org/10.1162/POSC_a_00222)  
26  
27 1086 Enserink, M. 2014. Sabotaged Scientist Sues Yale and Her Lab Chief. *Science*. 343(6175): 1065-1066.  
28  
29 1087 <http://dx.doi.org/10.1126/science.343.6175.1065>  
30  
31 1088 Enserink, M. 2017. A groundbreaking study on the dangers of 'microplastics' may be unraveling (March  
32  
33 1089 21, 2017). *Science*. <http://dx.doi.org/10.1126/science.aal0939>  
34  
35 1090 European Commission, 2016, Open Access to scientific information | Digital Single Market (October 28,  
36  
37 1091 2016), at <https://ec.europa.eu/digital-single-market/en/open-access-scientific-information>.  
38  
39 1092 Fairbrother, A. 2016. New Subcommittee on Scientific Integrity (18 February 2016). *SETAC Globe*. 17(2)  
40  
41 1093 Fairbrother, A. and R.S. Bennett. 1999. Ecological Risk Assessment and the Precautionary Principle.  
42  
43 1094 *Human and Ecological Risk Assessment: An International Journal*. 5(5): 943-949.  
44  
45 1095 <http://dx.doi.org/10.1080/10807039991289220>  
46  
47 1096 Fanelli, D. 2009. How Many Scientists Fabricate and Falsify Research? A Systematic Review and Meta-  
48  
49 1097 Analysis of Survey Data. *PLoS ONE*. 4(5): e5738.  
50  
51 1098 <http://dx.doi.org/10.1371/journal.pone.0005738>  
52  
53  
54  
55  
56  
57  
58  
59  
60

Review draft – not for distribution or attribution

- 1  
2  
3 1099 Fanelli, D. 2012. Negative results are disappearing from most disciplines and countries. *Scientometrics*.  
4  
5 1100 90(3): 891-904. <http://dx.doi.org/10.1007/s11192-011-0494-7>  
6  
7 1101 Farris, J.L. and J.H.V. Hassel, editors. 2006. *Freshwater Bivalve Ecotoxicology*. SETAC and CRC Press,  
8  
9 1102 408 pp  
10  
11 1103 Fenn, D.B. and N.M. Milton. 1997. Advocacy and the Scientist. *Fisheries*. 22(11): 4  
12  
13 1104 Folta, K.M., 2015, Transparency Weaponized Against Scientists (August 16, 2015): Science 2.0, at  
14  
15 [http://www.science20.com/kevin\\_folta/transparency\\_weaponized\\_against\\_scientists-156873](http://www.science20.com/kevin_folta/transparency_weaponized_against_scientists-156873).  
16 1105  
17 1106 Geist, D.R., C.S. Abernethy, K.D. Hand, V.I. Cullinan, J.A. Chandler, and P.A. Groves. 2006. Survival,  
18  
19 development, and growth of fall Chinook salmon embryos, alevin, and fry exposed to a variable  
20 1107  
21 thermal and dissolved oxygen regime. *Transactions of the American Fisheries Society*. 135(6):  
22 1108  
23 1462–1477. <http://dx.doi.org/10.1577/T05-294.1>  
24 1109  
25  
26 1110 Ghorayshi, A. 2016. "He thinks he's untouchable"-Sexual Harassment Case Exposes Renowned Ebola  
27  
28 Scientist (June 29, 2016). BuzzFeedNews. [https://www.buzzfeed.com/azeenghorayshi/michael-](https://www.buzzfeed.com/azeenghorayshi/michael-katze-investigation)  
29 1111  
30 [katze-investigation](https://www.buzzfeed.com/azeenghorayshi/michael-katze-investigation).  
31 1112  
32 1113 Gibbons, A. 2014. Sexual harassment is common in scientific fieldwork (July 16, 2014). *Science*.  
33  
34 1114 Glanz, J. and A. Armendariz, 2017, Years of Ethics Charges, but Star Cancer Researcher Gets a Pass  
35  
36 (March 8, 2017): New York Times, at [https://www.nytimes.com/2017/03/08/science/cancer-](https://www.nytimes.com/2017/03/08/science/cancer-carlo-croce.html)  
37 1115  
38 [carlo-croce.html](https://www.nytimes.com/2017/03/08/science/cancer-carlo-croce.html).  
39 1116  
40  
41 1117 Gleick, P.H. and 252 co-authors. 2010. Climate Change and the Integrity of Science. *Science*. 328(5979):  
42  
43 1118 689-690. <http://dx.doi.org/10.1126/science.328.5979.689>  
44  
45 1119 Goodstein, D. 1995. Conduct and Misconduct in Science. *Annals of the New York Academy of Sciences*.  
46  
47 1120 775(1): 31-38. <http://dx.doi.org/10.1111/j.1749-6632.1996.tb23124.x>  
48  
49 1121 Halpern, M. and M. Mann. 2015. Transparency versus harassment. *Science*. 348(6234): 479-479.  
50  
51 1122 <http://dx.doi.org/10.1126/science.aac4245>  
52  
53  
54  
55  
56  
57  
58  
59  
60

Review draft – not for distribution or attribution

- 1  
2  
3 1123 Harris, C.A., A.P. Scott, A.C. Johnson, G.H. Panter, D. Sheahan, M. Roberts, and J.P. Sumpter. 2014.  
4  
5 1124 Principles of Sound Ecotoxicology. *Environmental Science & Technology*. 48(6): 3100-3111.  
6  
7 1125 <http://dx.doi.org/10.1021/es4047507>  
8  
9 1126 Harris, C.A. and J.P. Sumpter. 2015. Could the Quality of Published Ecotoxicological Research Be  
10  
11 1127 Better? *Environmental Science & Technology*. 49(16): 9495-9496.  
12  
13 1128 <http://dx.doi.org/10.1021/acs.est.5b01465>  
14  
15 1129 Harris, D. and M. Patrick, 2011, Is 'Big Food's' Big Money Influencing the Science of Nutrition? (June  
16  
17 21,2011): ABC News, at [http://abcnews.go.com/US/big-food-money-accused-influencing-](http://abcnews.go.com/US/big-food-money-accused-influencing-science/story?id=13845186)  
18  
19 [science/story?id=13845186](http://abcnews.go.com/US/big-food-money-accused-influencing-science/story?id=13845186).  
20  
21 1131  
22 1132 Hayes, T.B. 2004. There Is No Denying This: Defusing the Confusion about Atrazine. *BioScience*.  
23  
24 1133 54(12): 1138-1149. [http://dx.doi.org/10.1641/0006-3568\(2004\)054\[1138:TINDTD\]2.0.CO;2](http://dx.doi.org/10.1641/0006-3568(2004)054[1138:TINDTD]2.0.CO;2)  
25  
26 1134 Henderson, D. and K. Thomson. 2017. Why Should Scientific Results Be Reproducible? (NOVA,  
27  
28 1135 WGBH, 15 minute video, released 19 January 2017). WGBH, NOVA.  
29  
30 1136 <http://www.pbs.org/wgbh/nova/next/body/reproducibility-explainer/>.  
31  
32 1137 Hey, E. and I. Chalmers. 2010. Mis-investigating alleged research misconduct can cause widespread,  
33  
34 unpredictable damage. *Journal of the Royal Society of Medicine*. 103(4): 133-138.  
35  
36 1138 <http://dx.doi.org/10.1258/jrsm.2010.09k045>  
37  
38 1139  
39 1140 Hobbs, D.A., M.S.J. Warne, and S.J. Markich. 2005. Evaluation of criteria used to assess the quality of  
40  
41 1141 aquatic toxicity data. *Integrated Environmental Assessment and Management*. 1(3): 174–180.  
42  
43 1142 <http://dx.doi.org/10.1897/2004-003R.1>  
44  
45 1143 Holdren, J.P. 2013. Increasing Access to the Results of Federally Funded Scientific Research.  
46  
47 1144 Memorandum for the heads of executive departments and agencies (February 22, 2013).  
48  
49 1145 Executive Office of the President, Office of Science and Technology Policy. , Washington, D.C.  
50  
51 1146 6 pp.  
52  
53 1147 Hopkin, M. 2006. Ecology: Caught between shores. *Nature*. 440(7081): 144-145.  
54  
55 1148 <http://dx.doi.org/10.1038/440144a>  
56  
57  
58  
59  
60

Review draft – not for distribution or attribution

- 1  
2  
3 1149 Huff, D. and I. Geis. 1954. How to lie with statistics. W.W. Norton, New York and London. (1993  
4  
5 1150 reissue). 142 pp  
6  
7 1151 Hurlbert, S.H. 1984. Pseudoreplication and the design of ecological field experiments. *Ecological*  
8  
9 1152 *Monographs*. 54(2): 187-211. <http://dx.doi.org/10.2307/1942661>  
10  
11 1153 Hutchings, J.A. 1997. Is scientific inquiry incompatible with government information control? *Canadian*  
12  
13 1154 *Journal of Fisheries and Aquatic Sciences*. 54(5): 1198-1210. <http://dx.doi.org/10.1139/f97-051>  
14  
15 1155 ICMJE. 2016. ICMJE Form for Disclosure of Potential Conflicts of Interest. International Committee of  
16  
17 1156 Medical Journal Editors. 3 pp. <http://icmje.org/conflicts-of-interest/>.  
18  
19 1157 Ioannidis, J.P.A. 2005. Why Most Published Research Findings Are False. *PLoS Med*. 2(8): e124.  
20  
21 1158 <http://dx.doi.org/10.1371/journal.pmed.0020124>  
22  
23 1159 Johnson, A.C., R.L. Donnachie, J.P. Sumpter, M.D. Jürgens, C. Moeckel, and M.G. Pereira. 2017. An  
24  
25 1160 alternative approach to risk rank chemicals on the threat they pose to the aquatic environment.  
26  
27 1161 *Science of the Total Environment*. 599-600: 1372-1381.  
28  
29 1162 <http://dx.doi.org/10.1016/j.scitotenv.2017.05.039>  
30  
31 1163 Johnson, A.C. and J.P. Sumpter. 2016. Are we going about chemical risk assessment for the aquatic  
32  
33 1164 environment the wrong way? *Environmental Toxicology and Chemistry*. 35(7): 1609-1616.  
34  
35 1165 <http://dx.doi.org/10.1002/etc.3441>  
36  
37 1166 Johnson, B.L. 2007. Intimidation of Scientists: A HERA Experience. *Human and Ecological Risk*  
38  
39 1167 *Assessment: An International Journal*. 13(3): 475-477.  
40  
41 1168 <http://dx.doi.org/10.1080/10807030701340870>  
42  
43 1169 Johnson, D.R. and E.H. Ecklund. 2016. Ethical ambiguity in science. *Science and Engineering Ethics*.  
44  
45 1170 22(4): 989-1005. <http://dx.doi.org/10.1007/s11948-015-9682-9>  
46  
47 1171 Kapustka, L. 2016. Words matter. *Integrated Environmental Assessment and Management*. 12(3): 592-  
48  
49 1172 593. <http://dx.doi.org/10.1002/ieam.1767>  
50  
51 1173 Keith, R., 2015, 13th retraction issued for Jesús Ángel Lemus (October 9, 2015), *Retraction Watch* at  
52  
53 1174 <http://retractionwatch.com/2015/10/09/13th-retraction-issued-for-jesus-angel-lemus/>.  
54  
55  
56  
57  
58  
59  
60

Review draft – not for distribution or attribution

- 1  
2  
3 1175 Kidwell, M.C., L.B. Lazarević, E. Baranski, T.E. Hardwicke, S. Piechowski, L.-S. Falkenberg, C.  
4  
5 1176 Kennett, A. Slowik, C. Sonnleitner, C. Hess-Holden, T.M. Errington, S. Fiedler, and B.A. Nosek.  
6  
7 1177 2016. Badges to Acknowledge Open Practices: A Simple, Low-Cost, Effective Method for  
8  
9 1178 Increasing Transparency. *PLOS Biology*. 14(5): e1002456.  
10  
11 <http://dx.doi.org/10.1371/journal.pbio.1002456>  
12  
13 1180 Kloor, K. 2015. Agricultural researchers rattled by demands for documents from group opposed to GM  
14  
15 1181 foods. *Science Insider*. . <http://dx.doi.org/10.1126/science.aaa7846>  
16  
17 1182 Kollipara, P. 2015. Open records laws becoming vehicle for harassing academic researchers, report warns  
18  
19 (Feb. 13, 2015). *Science*. <http://dx.doi.org/10.1126/science.aaa7856>  
20  
21 1183  
22 1184 Kolok, A.S. 2016. The dose makes the poison. Pages 1-9 in *Modern Poisons: A Brief Introduction to*  
23  
24 1185 *Contemporary Toxicology*. Springer International Publishing.  
25  
26 1186 Krinsky, S. 2005. The Funding Effect in Science and Its Implications for the Judiciary. *Journal of Law*  
27  
28 1187 *and Policy*. 13(1): 43-68  
29  
30 1188 Krumholz, H.M., J.S. Ross, A.H. Presler, and D.S. Egilman. 2007. What have we learnt from Vioxx?  
31  
32 1189 *BMJ : British Medical Journal*. 334(7585): 120-123.  
33  
34 <http://dx.doi.org/10.1136/bmj.39024.487720.68>  
35  
36 1190  
37 1191 Lackey, R.T. 2001. Values, Policy, and Ecosystem Health. *BioScience*. 51(6): 437-443.  
38  
39 1192 [http://dx.doi.org/10.1641/0006-3568\(2001\)051\[0437:VPAEH\]2.0.CO;2](http://dx.doi.org/10.1641/0006-3568(2001)051[0437:VPAEH]2.0.CO;2)  
40  
41 1193 Lackey, R.T. 2007. Science, scientists, and policy advocacy. *Conservation Biology*. 21(1): 12-17.  
42  
43 1194 <http://dx.doi.org/10.1111/j.1523-1739.2006.00639.x>  
44  
45 1195 Laine, H. 2017. Afraid of Scooping; Case Study on Researcher Strategies against Fear of Scooping in the  
46  
47 1196 Context of Open Science. *Data Science Journal*. 16: 29. <http://dx.doi.org/10.5334/dsj-2017-029>  
48  
49 1197 Levy, K.E. and D.M. Johns. 2016. When open data is a Trojan Horse: The weaponization of transparency  
50  
51 1198 in science and governance. *Big Data & Society*. 3(1).  
52  
53 <http://dx.doi.org/10.1177/2053951715621568>  
54  
55  
56  
57  
58  
59  
60



Review draft – not for distribution or attribution

- 1  
2  
3 1200 Lewandowsky, S. and D. Bishop. 2016. Research integrity: Don't let transparency damage science.  
4  
5 1201 *Nature*. 529: 459-461. <http://dx.doi.org/10.1038/529459a>  
6  
7 1202 Lexchin, J., L.A. Bero, B. Djulbegovic, and O. Clark. 2003. Pharmaceutical industry sponsorship and  
8  
9 1203 research outcome and quality: systematic review. *BMJ*. 326(7400): 1167-1170.  
10  
11 1204 <http://dx.doi.org/10.1136/bmj.326.7400.1167>  
12  
13 1205 Lindenmayer, D.B. and G.E. Likens. 2010. The science and application of ecological monitoring.  
14  
15 1206 *Biological Conservation*. 143(6): 1317-1328. <http://dx.doi.org/10.1016/j.biocon.2010.02.013>  
16  
17 1207 Macleod, M. 2014. Some salt with your statin, Professor? *PLOS Biology*. 12(1): e1001768.  
18  
19 1208 <http://dx.doi.org/10.1371/journal.pbio.1001768>  
20  
21 1209 Marcus, A. and I. Oransky. 2016. CRISPR controversy reveals how badly journals handle conflicts of  
22  
23 1210 interest (January 21, 2016). *STAT*. [https://www.statnews.com/2016/01/21/crispr-conflicts-of-](https://www.statnews.com/2016/01/21/crispr-conflicts-of-interest/)  
24  
25 1211 [interest/](https://www.statnews.com/2016/01/21/crispr-conflicts-of-interest/)  
26  
27 1212 Martinson, B.C., M.S. Anderson, and R. de Vries. 2005. Scientists behaving badly. *Nature*. 435(7043):  
28  
29 1213 737-738. <http://dx.doi.org/10.1038/435737a>  
30  
31 1214 McClellan, F. 2008. The Vioxx Litigation: A Critical Look at Trial Tactics, the Tort System, and the  
32  
33 1215 Roles of Lawyers in Mass Tort Litigation. *DePaul Law Review*. 57: 509–538  
34  
35 1216 McGarity, T.O. 2003. Our Science Is Sound Science and Their Science Is Junk Science: Science-Based  
36  
37 1217 Strategies for Avoiding Accountability and Responsibility for Risk-Producing Products and  
38  
39 1218 Activities. *Kansas Law Review*. 897-937  
40  
41 1219 McGarity, T.O. and W.E. Wagner. 2012. Bending Science: How Special Interests Corrupt Public Health  
42  
43 1220 Research. Harvard University Press, Cambridge, MA  
44  
45 1221 McNutt, M. 2016. #IAmAResearchParasite. *Science*. 351(6277): 1005-1005.  
46  
47 1222 <http://dx.doi.org/10.1126/science.aaf4701>  
48  
49 1223 McNutt, M., K. Lehnert, B. Hanson, B.A. Nosek, A.M. Ellison, and J.L. King. 2016. Liberating field  
50  
51 1224 science samples and data. *Science*. 351(6277): 1024-1026.  
52  
53 1225 <http://dx.doi.org/10.1126/science.aad7048>  
54  
55  
56  
57  
58  
59  
60

Review draft – not for distribution or attribution

- 1  
2  
3 1226 Mebane, C.A., R.J. Eakins, B.G. Fraser, and W.J. Adams. 2015. Recovery of a mining-damaged stream  
4  
5 1227 ecosystem. *Elementa: Science of the Anthropocene*. 3(1): 000042.  
6  
7 1228 <http://dx.doi.org/10.12952/journal.elementa.000042>  
8  
9 1229 Mebane, C.A. and J.S. Meyer. 2016. Environmental Toxicology without Chemistry and Publications  
10  
11 1230 without Discourse: Linked Impediments to Better Science. *Environmental Toxicology and*  
12  
13 1231 *Chemistry*. 35(6): 1335–1336. <http://dx.doi.org/10.1002/etc.3418>  
14  
15 1232 Melvin, S.D., K.R. Munkittrick, T. Bosker, and D.L. MacLatchy. 2009. Detectable effect size and  
16  
17 1233 bioassay power of mummichog (*Fundulus heteroclitus*) and fathead minnow (*Pimephales*  
18  
19 1234 *promelas*) adult reproductive tests. *Environmental Toxicology and Chemistry*. 28(11): 2416–2425  
20  
21 1235 <http://dx.doi.org/10.1897/08-601.1>  
22  
23 1236 Meyer, J.N. and A.B. Francisco. 2013. A call for fuller reporting of toxicity test data. *Integrated*  
24  
25 1237 *Environmental Assessment and Management*. 9(2): 347-348. <http://dx.doi.org/10.1002/ieam.1406>  
26  
27 1238 Mozur, M.C. 2012. A global professional society. *Integrated Environmental Assessment and*  
28  
29 1239 *Management*. 8(1): 1-1. <http://dx.doi.org/10.1002/ieam.1270>  
30  
31 1240 Mudge, J.F., T.J. Barrett, K.R. Munkittrick, and J.E. Houlahan. 2012. Negative Consequences of Using  $\alpha$   
32  
33 1241 = 0.05 for Environmental Monitoring Decisions: A Case Study from a Decade of Canada's  
34  
35 1242 Environmental Effects Monitoring Program. *Environmental Science & Technology*. 46(17): 9249-  
36  
37 1243 9255. <http://dx.doi.org/10.1021/es301320n>  
38  
39 1244 Munkittrick, K.R., C.J. Arens, R.B. Lowell, and G.P. Kaminski. 2009. A review of potential methods for  
40  
41 1245 determining critical effect size for designing environmental monitoring programs. *Environmental*  
42  
43 1246 *Toxicology and Chemistry*. 28(7): 1361-1371. <http://dx.doi.org/10.1897/08-376.1>  
44  
45 1247 Murray, K.R., S.J. McCardell, and J.R. Schofield. 1999. Natural Resource Damage Trustees: Whose Side  
46  
47 1248 Are They Really On? *Environmental Lawyer*. 5: 407-467  
48  
49 1249 NAS. 1992. Responsible Science: Ensuring the Integrity of the Research Process. National Academy of  
50  
51 1250 Sciences, National Academy Press, Washington, D.C. <https://doi.org/10.17226/1864>.  
52  
53  
54  
55  
56  
57  
58  
59  
60

Review draft – not for distribution or attribution

- 1  
2  
3 1251 NAS. 2017. *Fostering Integrity in Research*. National Academy of Sciences, National Academy Press,  
4  
5 1252 Washington, D.C. 284 pp. <https://doi.org/10.17226/21896>.  
6  
7 1253 Nature Editors. 2014. Why high-profile journals have more retractions (17 September 2014). *Nature*.  
8  
9 1254 <http://dx.doi.org/10.1038/nature.2014.15951>  
10  
11 1255 Nature Editors. 2018. Nature journals tighten rules on non-financial conflicts. *Nature*. 554(6).  
12  
13 1256 <http://dx.doi.org/10.1038/d41586-018-01420-8>  
14  
15 1257 Nature Medicine Editors. 2017. Take science off the stand. *Nature Medicine*. 23(3): 265-265.  
16  
17 1258 <http://dx.doi.org/10.1038/nm.4303>  
18  
19 1259 Nelson, B. 2009. Data sharing: Empty archives. *Nature*. 461: 160-163. <http://dx.doi.org/10.1038/461160a>  
20  
21 1260 Norton, S.B., S.M. Cormier, and G.W. Suter, II. 2002. The easiest person to fool. *Environmental*  
22  
23 *Toxicology and Chemistry*. 21(6): 1099-1100. <http://dx.doi.org/10.1002/etc.5620210601>  
24  
25 1261  
26 1262 Nosek, B.A. and 39 co-authors. 2015. Promoting an open research culture. *Science*. 348(6242): 1422-  
27  
28 1263 1425. <http://dx.doi.org/10.1126/science.aab2374>  
29  
30 1264 Nosek, B.A. and T.M. Errington. 2017. Making sense of replications. *eLife*. 6: e23383.  
31  
32 1265 <http://dx.doi.org/10.7554/eLife.23383>  
33  
34 1266 NRC-CNRC. 2013. NRC's Research Integrity Policy. National Research Council Canada. 28 pp.  
35  
36 1267 [http://www.nrc-cnrc.gc.ca/eng/about/policies/research\\_integrity/](http://www.nrc-cnrc.gc.ca/eng/about/policies/research_integrity/).  
37  
38 1268 NRC. 2002. *Integrity in Scientific Research: Creating an Environment That Promotes Responsible*  
39  
40 *Conduct*. National Research Council (US), National Academy Press, Washington, D.C.  
41  
42 1269  
43 1270 Nuzzo, R. 2015. How scientists fool themselves – and how they can stop. *Nature*. 526: 182–185 (08  
44  
45 1271 October 2015). <http://dx.doi.org/10.1038/526182a>  
46  
47 1272 Obama, B. 2009. Scientific Integrity (Presidential documents, Memorandum of March 9, 2009). *Federal*  
48  
49 1273 *Register*. 74(46): 10671-10672  
50  
51 1274 Ogden, L.E. 2016. Nine years of censorship. *Nature*. 533 26–28. <http://dx.doi.org/10.1038/533026a>  
52  
53 1275 Oransky, I. 2015. How Publish or Perish Promotes Inaccuracy in Science—and Journalism. *AMA Journal*  
54  
55 *of Ethics*. 17(12): 1172-1175. <http://dx.doi.org/10.1001/journalofethics.2015.17.12.sect1-1512>  
56  
57 1276  
58  
59  
60

Review draft – not for distribution or attribution

- 1  
2  
3 1277 Oreskes, N., D. Carlat, M.E. Mann, P.D. Thacker, and F.S. vom Saal. 2015. Viewpoint: Why Disclosure  
4  
5 1278 Matters. *Environmental Science & Technology*. 49(13): 7527-7528.  
6  
7 1279 <http://dx.doi.org/10.1021/acs.est.5b02726>  
8  
9 1280 Oreskes, N. and E.M. Conway. 2010. Defeating the merchants of doubt. *Nature*. 465(7299): 686-687.  
10  
11 1281 <http://dx.doi.org/10.1038/465686a>  
12  
13 1282 Owen, S.F., D.B. Huggett, T.H. Hutchinson, M.J. Hetheridge, P. McCormack, L.B. Kinter, J.F. Ericson,  
14  
15 L.A. Constantine, and J.P. Sumpter. 2010. The value of repeating studies and multiple controls:  
16 1283 replicated 28-day growth studies of rainbow trout exposed to clofibric acid. *Environmental*  
17  
18 1284 *Toxicology and Chemistry*. 29(12): 2831-2839. <http://dx.doi.org/10.1002/etc.351>  
19  
20 1285  
21  
22 1286 Parker, K.R. and J.A. Wiens. 2005. Assessing recovery following environmental accidents: environmental  
23  
24 1287 variation, ecological assumptions, and strategies. *Ecological Applications*. 15(6): 2037-2051.  
25  
26 1288 <http://dx.doi.org/10.1890/04-1723>  
27  
28 1289 Parker, T.H., W. Forstmeier, J. Koricheva, F. Fidler, J.D. Hadfield, Y.E. Chee, C.D. Kelly, J. Gurevitch,  
29  
30 and S. Nakagawa. 2016. Transparency in Ecology and Evolution: Real Problems, Real Solutions.  
31  
32 1290 *Trends in Ecology & Evolution*. 31(9): 711-719. <http://dx.doi.org/10.1016/j.tree.2016.07.002>  
33  
34 1291  
35 1292 Peterman, R.M. and M. M'Gonigle. 1992. Statistical power analysis and the precautionary principle.  
36  
37 1293 *Marine Pollution Bulletin*. 24(5): 231-234. [http://dx.doi.org/10.1016/0025-326X\(92\)90559-O](http://dx.doi.org/10.1016/0025-326X(92)90559-O)  
38  
39 1294 PLOS, 2014, Data Availability, accessed March 2, 2017 at [http://journals.plos.org/plosone/s/data-](http://journals.plos.org/plosone/s/data-availability)  
40  
41 1295 [availability](http://journals.plos.org/plosone/s/data-availability).  
42  
43 1296 PLOS Medicine Editors. 2008. Making Sense of Non-Financial Competing Interests. *PLoS Med*. 5(9):  
44  
45 1297 e199. <http://dx.doi.org/10.1371/journal.pmed.0050199>  
46  
47 1298 Power, M., G. Power, and D.G. Dixon. 1995. Detection and decision-making in environmental effects  
48  
49 1299 monitoring. *Environmental Management*. 19(5): 629-639. <http://dx.doi.org/10.1007/BF02471945>  
50  
51 1300 Rekdal, O.B. 2014. Academic urban legends. *Social Studies of Science*. 44(4): 638-654.  
52  
53 1301 <http://dx.doi.org/10.1177/0306312714535679>  
54  
55  
56  
57  
58  
59  
60

Review draft – not for distribution or attribution

- 1  
2  
3 1302 Renner, R. 2005. Proposed selenium standard under attack. *Environmental Science & Technology*. 39(6):  
4  
5 1303 125A-126A. <http://dx.doi.org/10.1021/es053215n>  
6  
7 1304 Resnik, D.B., T. Neal, A. Raymond, and G.E. Kissling. 2015. Research Misconduct Definitions Adopted  
8  
9 1305 by U.S. Research Institutions. *Accountability in Research*. 22(1): 14-21.  
10  
11 1306 <http://dx.doi.org/10.1080/08989621.2014.891943>  
12  
13 1307 Resnik, D.B. and A.E. Shamoo. 2011. The Singapore Statement on Research Integrity. *Accountability in*  
14  
15 1308 *Research*. 18(2): 71-75. <http://dx.doi.org/10.1080/08989621.2011.557296>  
16  
17 1309 Roberts, P.D., G.B. Stewart, and A.S. Pullin. 2006. Are review articles a reliable source of evidence to  
18  
19 1310 support conservation and environmental management? A comparison with medicine. *Biological*  
20  
21 1311 *Conservation*. 132(4): 409-423. <http://dx.doi.org/10.1016/j.biocon.2006.04.034>  
22  
23 1312 Ross, T. 2017. Crime in the cancer lab (January 27, 2017). New York Times.  
24  
25 1313 [https://www.nytimes.com/2017/01/28/opinion/sunday/a-crime-in-the-cancer-lab.html?\\_r=1](https://www.nytimes.com/2017/01/28/opinion/sunday/a-crime-in-the-cancer-lab.html?_r=1).  
26  
27 1314 Ruff, K. 2015. Scientific journals and conflict of interest disclosure: what progress has been made?  
28  
29 1315 *Environmental Health*. 14(1): 1-8. <http://dx.doi.org/10.1186/s12940-015-0035-6>  
30  
31 1316 Schäfer, R.B., M. Bundschuh, A. Focks, and P.C. von der Ohe. 2013. To the Editor [authors should make  
32  
33 1317 all their raw data accessible]. *Environmental Toxicology and Chemistry*. 32(4): 734-735.  
34  
35 1318 <http://dx.doi.org/10.1002/etc.2140>  
36  
37 1319 Schindler, D.W. 1998. Replication versus realism: The need for ecosystem-scale experiments.  
38  
39 1320 *Ecosystems*. 1(4): 323-334. <http://dx.doi.org/10.1007/s100219900026>  
40  
41 1321 Scott, J.M. and J.L. Rachlow. 2011. Refocusing the Debate about Advocacy. *Conservation Biology*.  
42  
43 1322 25(1): 1-3. <http://dx.doi.org/10.1111/j.1523-1739.2010.01629.x>  
44  
45 1323 Scott, J.M., J.L. Rachlow, R.T. Lackey, A.B. Pidgorna, J.L. Aycrigg, G.R. Feldman, L.K. Svancara, D.A.  
46  
47 1324 Rupp, D.I. Stanish, and R.K. Steinhorst. 2007. Policy Advocacy in Science: Prevalence,  
48  
49 1325 Perspectives, and Implications for Conservation Biologists. *Conservation Biology*. 21(1): 29-35.  
50  
51 1326 <http://dx.doi.org/10.1111/j.1523-1739.2006.00641.x>  
52  
53  
54  
55  
56  
57  
58  
59  
60

Review draft – not for distribution or attribution

- 1  
2  
3 1327 Sedlak, D. 2016. Crossing The Imaginary Line. *Environmental Science & Technology*. 50(18): 9803-  
4  
5 1328 9804. <http://dx.doi.org/10.1021/acs.est.6b04432>  
6  
7 1329 Shaw, D. and P. Satalkar. 2018. Researchers' interpretations of research integrity: A qualitative study.  
8  
9 1330 *Accountability in Research*. 1-15. <http://dx.doi.org/10.1080/08989621.2017.1413940>  
10  
11 1331 Shrader-Frechette, K. 2012. Research Integrity and Conflicts of Interest: The Case of Unethical Research-  
12  
13 1332 Misconduct Charges Filed by Edward Calabrese. *Accountability in Research*. 19(4): 220-242.  
14  
15 1333 <http://dx.doi.org/10.1080/08989621.2012.700882>  
16  
17 1334 Skorupa, J.P., T.S. Presser, S.J. Hamilton, A.D. Lemly, and B.E. Sample. 2004. EPA's Draft Tissue-Based  
18  
19 1335 Selenium Criterion: A Technical Review. U.S. Fish and Wildlife Service, U.S. Geological  
20  
21 1336 Survey, U.S. Forest Service and CH2M Hill. 35 pp.  
22  
23 1337 <https://wwwrcamnl.wr.usgs.gov/Selenium/library.htm>  
24  
25 1338 Smaldino, P.E. and R. McElreath. 2016. The natural selection of bad science. *Royal Society Open*  
26  
27 1339 *Science*. 3(9). <http://dx.doi.org/10.1098/rsos.160384>  
28  
29 1340 Smith, R. 2006. Conflicts of interest: how money clouds objectivity. *Journal of the Royal Society of*  
30  
31 1341 *Medicine*. 99(6): 292-297  
32  
33 1342 Smith, R. and I. Roberts. 2016. Time for sharing data to become routine: the seven excuses for not doing  
34  
35 1343 so are all invalid [version 1; referees: 2 approved, 1 approved with reservations]. *F1000Research*.  
36  
37 1344 5(781). <http://dx.doi.org/10.12688/f1000research.8422.1>  
38  
39 1345 Snyder, B.F. and L.M. Hooper-Bui. 2018. A Teachable Moment: The Relevance of Ethics and the Limits  
40  
41 1346 of Science. *BioScience*. bix165-bix165. <http://dx.doi.org/10.1093/biosci/bix165>  
42  
43 1347 Solomon, K.R., J.A. Carr, L.H. Du Preez, J.P. Giesy, R.J. Kendall, E.E. Smith, and G.J. Van Der Kraak.  
44  
45 1348 2008. Effects of Atrazine on Fish, Amphibians, and Aquatic Reptiles: A Critical Review. *Critical*  
46  
47 1349 *Reviews in Toxicology*. 38(9): 721-772. <http://dx.doi.org/10.1080/10408440802116496>  
48  
49 1350 Stedeford, T. 2007. Prior restraint and censorship: acknowledged occupational hazards for government  
50  
51 1351 scientists. *William and Mary Environmental Law and Policy Review*. 31(3): 725-745.  
52  
53  
54  
55  
56  
57  
58  
59  
60

Review draft – not for distribution or attribution

- 1  
2  
3 1352 Stein, R. and J. Eilperin. 2010. Obama administration issues guidelines designed to ensure 'scientific  
4  
5 1353 integrity' (December 17, 2010). *Washington Post*.  
6  
7 1354 Steneck, N.H. 2006. Fostering integrity in research: Definitions, current knowledge, and future directions.  
8  
9 1355 *Science and Engineering Ethics*. 12(1): 53-74. <http://dx.doi.org/10.1007/PL00022268>  
10  
11 1356 Stern, V. 2017. Updated: Why would a university pay a scientist found guilty of misconduct to leave? (2  
12  
13 1357 October 2017). *Science*. <http://dx.doi.org/10.1126/science.aan7182>  
14  
15 1358 Stokstad, E. 2012. Fracking Report Criticized for Apparent Conflict of Interest (July 24, 2012). *Science*.  
16  
17 <http://www.sciencemag.org/news/2012/07/fracking-report-criticized-apparent-conflict-interest>.  
18  
19 1359  
20 1360 Sumner, P., S. Vivian-Griffiths, J. Boivin, A. Williams, C.A. Venetis, A. Davies, J. Ogden, L. Whelan, B.  
21  
22 1361 Hughes, B. Dalton, F. Boy, and C.D. Chambers. 2014. The association between exaggeration in  
23  
24 1362 health related science news and academic press releases: retrospective observational study. *BMJ* :  
25  
26 1363 *British Medical Journal*. 349. <http://dx.doi.org/10.1136/bmj.g7015>  
27  
28 1364 Suter, G.W., II and S.M. Cormier. 2015a. Bias in the development of health and ecological assessments  
29  
30 1365 and potential solutions. *Human and Ecological Risk Assessment*. 22(1): 99-115.  
31  
32 1366 <http://dx.doi.org/10.1080/10807039.2015.1056062>  
33  
34 1367 Suter, G.W., II and S.M. Cormier. 2015b. The Problem of Biased Data and Potential Solutions for Health  
35  
36 1368 and Environmental Assessments. *Human and Ecological Risk Assessment*. 21(7): 1736-1752.  
37  
38 1369 <http://dx.doi.org/10.1080/10807039.2014.974499>  
39  
40 1370 Suter, G.W., II., S.B. Norton, and S.M. Cormier. 2002. A method for inferring the causes of observed  
41  
42 1371 impairments in aquatic ecosystems. *Environmental Toxicology and Chemistry*. 21(6): 1101-1111.  
43  
44 1372 <http://dx.doi.org/10.1002/etc.5620210602>  
45  
46 1373 Tollefson, J. 2015. Earth science wrestles with conflict-of-interest policies. *Nature*. 522: 403-404.  
47  
48 1374 <http://dx.doi.org/10.1038/522403a>  
49  
50 1375 Topf, A., 2016, Imperial Metals sues engineering companies over Mount Polley disaster (July 10, 2016):  
51  
52 1376 Mining.com, accessed February 7, 2017 at [http://www.mining.com/imperial-metals-sues-](http://www.mining.com/imperial-metals-sues-engineering-companies-mount-polley-disaster/)  
53  
54 1377 [engineering-companies-mount-polley-disaster/](http://www.mining.com/imperial-metals-sues-engineering-companies-mount-polley-disaster/).  
55  
56  
57  
58  
59  
60

Review draft – not for distribution or attribution

- 1  
2  
3 1378 U.S. Department of Interior, 2014, Code of Scientific and Scholarly Conduct (poster), at  
4  
5 1379 [https://www.doi.gov/scientificintegrity/upload/DOI-Code-of-Scientific-and-Scholarly-Conduct-](https://www.doi.gov/scientificintegrity/upload/DOI-Code-of-Scientific-and-Scholarly-Conduct-Poster-December-2014.pdf)  
6  
7 1380 [Poster-December-2014.pdf](https://www.doi.gov/scientificintegrity/upload/DOI-Code-of-Scientific-and-Scholarly-Conduct-Poster-December-2014.pdf).  
8  
9 1381 USEPA. 2013. Aquatic Life Ambient Water Quality Criteria For Ammonia – Freshwater 2013. EPA 822-  
10  
11 1382 R-13-001. 255 pp.  
12  
13 1383 <http://water.epa.gov/scitech/swguidance/standards/criteria/aqlife/ammonia/index.cfm>.  
14  
15 1384 van Iersel, S., E.M. Swart, Y. Nakadera, N.M. van Straalen, and J.M. Koene. 2014. Effect of Male  
16  
17 Accessory Gland Products on Egg Laying in Gastropod Molluscs. *Journal of Visualized*  
18 1385 *Experiments*. 88: e51698. <http://dx.doi.org/10.3791/51698>  
19  
20 1386  
21  
22 1387 Van Kirk, R.W. and S.L. Hill. 2007. Demographic model predicts trout population response to selenium  
23  
24 1388 based on individual-level toxicity. *Ecological Modelling*. 206(3-4): 407-420.  
25  
26 1389 <http://dx.doi.org/10.1016/j.ecolmodel.2007.04.003>  
27  
28 1390 van Kolschooten, F. 2002. Conflicts of interest: Can you believe what you read? *Nature*. 416(6879): 360-  
29  
30 1391 363  
31  
32 1392 Van Noorden, R. 2014. Publishers withdraw more than 120 gibberish papers (24 February 2014). *Nature*.  
33  
34 1393 <http://dx.doi.org/10.1038/nature.2014.14763>  
35  
36 1394 Vines, T.H., A.Y.K. Albert, R.L. Andrew, F. Débarre, D.G. Bock, M.T. Franklin, K.J. Gilbert, J.-S.  
37  
38 Moore, S. Renaut, and D.J. Rennison. 2014. The availability of research data declines rapidly  
39 1395 with article age. *Current Biology*. 24(1): 94-97.  
40  
41 1396 <http://dx.doi.org/http://dx.doi.org/10.1016/j.cub.2013.11.014>  
42  
43 1397  
44  
45 1398 Wadman, M. 1997. \$100m payout after drug data withheld. *Nature*. 388(6644): 703-703  
46  
47 1399 Wagner, W. 2005. The perils of relying on interested parties to evaluate scientific quality. *American*  
48  
49 *Journal of Public Health*. 95(S1): S99-S106. <http://dx.doi.org/10.2105/AJPH.2004.044792>  
50  
51 1400  
52 1401 Wagner, W.E. and D. Michaels. 2004. Equal Treatment for Regulatory Science: Extending the Controls  
53  
54 1402 Governing the Quality of Public Research to Private Research. *American Journal of Law &*  
55  
56 1403 *Medicine*. 30(2-3): 119-154. <http://dx.doi.org/10.1177/009885880403000202>  
57  
58  
59  
60



Review draft – not for distribution or attribution

- 1  
2  
3 1404 Wiens, J.A. and K.R. Parker. 1995. Analyzing the effects of accidental environmental impacts:  
4  
5 1405 approaches and assumptions. *Ecological Applications*. 5(4): 1069-1083.  
6  
7 1406 <http://dx.doi.org/10.2307/2269355>  
8  
9 1407 Wise, J. 1997. Research suppressed for seven years by drug company. *BMJ : British Medical Journal*.  
10  
11 1408 314(7088): 1145-1145. <http://dx.doi.org/10.1136/bmj.314.7088.1145>  
12  
13 1409 Womack, R.P. 2015. Research Data in Core Journals in Biology, Chemistry, Mathematics, and Physics.  
14  
15 1410 *PLoS ONE*. 10(12): e0143460. <http://dx.doi.org/10.1371/journal.pone.0143460>  
16  
17 1411 Young, N.S., J.P.A. Ioannidis, and O. Al-Ubaydli. 2008. Why Current Publication Practices May Distort  
18  
19 1412 Science. *PLOS Medicine*. 5(10): e201. <http://dx.doi.org/10.1371/journal.pmed.0050201>  
20  
21  
22 1413  
23  
24  
25  
26  
27  
28  
29  
30  
31  
32  
33  
34  
35  
36  
37  
38  
39  
40  
41  
42  
43  
44  
45  
46  
47  
48  
49  
50  
51  
52  
53  
54  
55  
56  
57  
58  
59  
60
